# Supplementary material
Source: PubMed Central journal article supplement (PMC8462514)
Supplement: aim-olf-M212239-M21-2239_Supplement.pdf [file aim-olf-M212239-M21-2239_Supplement.pdf]

## Supplementary Material\*

Reif J, Heun-Johnson H, Tysinger B, et al. Measuring the COVID-19 mortality burden in the United States. A microsimulation study. *Ann Intern Med.* 2021. [Epub ahead of print]. doi:10.7326/M21-2239

Supplement 1. Additional Analyses

Supplement 2. The Future Adult Model: Technical Documentation

Supplement 3. Future Adult Model Estimates

Supplement 4. The Future Elderly Model: Technical Documentation

Supplement 5. Future Elderly Model Estimates

\* This supplementary material was provided by the authors to give readers further details on their article. The material was reviewed but not copyedited.

# **Measuring the COVID-19 Mortality Burden in the United States: A Microsimulation Study**

Julian Reif, PhD; Hanke Heun-Johnson, PhD; Bryan Tysinger, PhD; Darius Lakdawalla, PhD

August 2021

This appendix provides additional information and analyses not reported in the main text.

## **TABLE OF CONTENTS**

### **Section 1. Excess Mortality Data**

### **Section 2. COVID-19 Mortality Odds Ratios**

### **Section 3. Methods**

### **Section 4. Additional Results**

## List of Supplementary Tables and Figures

|                                                                                                                                                                                                                                                                |           |
|----------------------------------------------------------------------------------------------------------------------------------------------------------------------------------------------------------------------------------------------------------------|-----------|
| <b>Supplement Table 1. COVID-19 mortality odds ratios for different comorbidities .....</b>                                                                                                                                                                    | <b>8</b>  |
| <b>Supplement Table 2. Lower bound of 95% uncertainty interval: years of life lost and quality-adjusted life-years lost due the US COVID-19 pandemic, by age group, sex, and race/ethnicity .....</b>                                                          | <b>9</b>  |
| <b>Supplement Table 3. Upper bound of 95% uncertainty interval: years of life lost and quality-adjusted life-years lost due the US COVID-19 pandemic, by age group, sex, and race/ethnicity .....</b>                                                          | <b>10</b> |
| <b>Supplement Table 4. Lower bound of 95% uncertainty interval: years of life lost and quality-adjusted life-years lost due the US COVID-19 pandemic, by 10-year age group .....</b>                                                                           | <b>11</b> |
| <b>Supplement Table 5. Upper bound of 95% uncertainty interval: years of life lost and quality-adjusted life-years lost due the US COVID-19 pandemic, by 10-year age group .....</b>                                                                           | <b>12</b> |
| <b>Supplement Table 6. Individualized Risk analysis: years of life lost and quality-adjusted life-years lost due to the US COVID-19 pandemic, by COVID-19 vs. non-COVID-19 excess deaths and 10-year age group ...</b>                                         | <b>13</b> |
| <b>Supplement Table 7. Lower bound of 95% uncertainty interval: Individualized Risk analysis: years of life lost and quality-adjusted life-years lost due the US COVID-19 pandemic, by COVID-19 vs. non-COVID-19 excess deaths and 10-year age group .....</b> | <b>14</b> |
| <b>Supplement Table 8. Upper bound of 95% uncertainty interval: Individualized Risk analysis: years of life lost and quality-adjusted life-years lost due the US COVID-19 pandemic, by COVID-19 vs. non-COVID-19 excess deaths and 10-year age group .....</b> | <b>15</b> |
| <br>                                                                                                                                                                                                                                                           |           |
| <b>Supplement Figure 1. Prevalence of risk factors in 2020 that are positively associated with COVID-19 mortality .....</b>                                                                                                                                    | <b>16</b> |
| <b>Supplement Figure 2. Black population: prevalence of risk factors in 2020 that are positively associated with COVID-19 mortality .....</b>                                                                                                                  | <b>17</b> |
| <b>Supplement Figure 3. Hispanic population: prevalence of risk factors in 2020 that are positively associated with COVID-19 mortality .....</b>                                                                                                               | <b>18</b> |
| <b>Supplement Figure 4. White population: prevalence of risk factors in 2020 that are positively associated with COVID-19 mortality .....</b>                                                                                                                  | <b>19</b> |
| <b>Supplement Figure 5. Predicted years of life lost due to the US COVID-19 pandemic, relative to average life expectancy in the decedent's age-sex-race/ethnicity subgroup, by age group, sex, and race/ethnicity .....</b>                                   | <b>20</b> |
| <b>Supplement Figure 6. Average Risk analysis: number of quality-adjusted life-years lost per 10,000, by age group and comorbidity .....</b>                                                                                                                   | <b>21</b> |
| <b>Supplement Figure 7. Frailty-Based Risk analysis: number of quality-adjusted life-years lost per 10,000, by age group and comorbidity .....</b>                                                                                                             | <b>22</b> |
| <b>Supplement Figure 8. Number of quality-adjusted life-years lost per 10,000, by age group, sex, and race/ethnicity .....</b>                                                                                                                                 | <b>23</b> |
| <b>Supplement Figure 9. Average Risk analysis: number of quality-adjusted life-years lost per 10,000, by race/ethnicity and comorbidity .....</b>                                                                                                              | <b>24</b> |
| <b>Supplement Figure 10. Frailty-Based Risk analysis: number of quality-adjusted life-years lost per 10,000, by race/ethnicity and comorbidity .....</b>                                                                                                       | <b>25</b> |

## Section 1. Excess Mortality Data

Our data on excess deaths come from two separate datasets provided by the Centers for Disease Control and Prevention (CDC). We use the first dataset to determine our sample period, which we define as the largest set of weeks with uninterrupted excess mortality. The second dataset provides weekly counts of total excess deaths and COVID-19-related deaths.

We obtained the first dataset from the CDC's estimates of "excess deaths associated with COVID-19" for the US and Puerto Rico on June 26, 2021. This first dataset is available at:

<https://data.cdc.gov/NCHS/Excess-Deaths-Associated-with-COVID-19/xkkf-xrst/>

We relied on the CDC's implementation of the Farrington Surveillance algorithm to compare deaths in 2020 and 2021 to deaths from prior years, as described here:

[https://www.cdc.gov/nchs/nvss/vsrr/covid19/excess\\_deaths.htm](https://www.cdc.gov/nchs/nvss/vsrr/covid19/excess_deaths.htm)

According to the CDC's algorithm, statistically significant excess mortality commenced in week 13 of 2020 (the week beginning on March 22, 2020) and persisted until week 10 of 2021 (the week ending on March 13, 2021). Week 11 was the first week since the onset of the COVID-19 pandemic in which there was not a statistically significant excess death toll (based on the data we downloaded on June 26, 2021). We therefore defined our sample period as March 22, 2020 through March 13, 2021.

Next, we extracted the weekly number of COVID-19 deaths (defined as deaths where ICD-10 code U07.1 was listed as a contributing cause of death) and the weekly number of deaths above the average (as compared to 2015-2019) for each age-sex-race/ethnicity category for the time period March 22, 2020 through March 13, 2021. This second dataset is available at:

<https://data.cdc.gov/NCHS/AH-Excess-Deaths-by-Sex-Age-and-Race/m74n-4hbs>

To align the CDC's race/ethnicity categories with the other data sources described below, we recoded them as follows. The CDC categories non-Hispanic White, non-Hispanic Asian, non-Hispanic American Indian or Alaska Native, non-Hispanic Native Hawaiian or Other Pacific Islander, or Other were coded as White; the category non-Hispanic Black was coded as Black; and the category Hispanic was coded as Hispanic.

The number of deaths estimated by the CDC for the most recent weeks of the dataset was adjusted to account for reporting lags. Because this adjustment is imperfect, it can result in negative values for non-COVID-19 weekly excess deaths. We therefore set negative values for non-COVID-19 weekly excess deaths reported by the CDC during the time period April 14, 2021 through March 13, 2021 to zero.

Finally, we calculated the total number of excess deaths and the total number of COVID-19 deaths by summing across all weeks, for each age-sex-race/ethnicity subgroup. The number of non-COVID-19 excess deaths for each age-sex-race/ethnicity subgroup was determined by subtracting total COVID-19 deaths from the total number of excess deaths. In a small number of age-sex-race/ethnicity subgroups, the total number of non-COVID-19 excess deaths was slightly negative; per CDC methodology, these negative values were set equal to zero.

To calculate excess death rates per 10,000 people in each age-sex-race/ethnicity subgroup, we divided the number of excess deaths by the subgroup's population, as estimated by the Health and Retirement Study (HRS) for those over age 55 and the Panel Study of Income Dynamics (PSID) for younger age groups. The HRS and the PSID serve as the host databases for the microsimulation model of years of life lost, as described in Section 3 below.

## Section 2. COVID-19 Mortality Odds Ratios

We obtained COVID-19 mortality odds ratios (OR) for different risk factors from the most recent update of an associational study of over 17 million adults using the openSAFELY platform in England (1, 2). These estimates apply to the entire population that was registered with a general practice using the openSAFELY platform. Thus,

these estimates are not limited to hospitalized or symptomatic people. COVID-19 deaths are identified as those where the underlying cause is coded as U07.1 (“COVID-19, virus identified”) or U07.2 (“COVID-19, virus not identified”) between February 1, 2020 and November 9, 2020. By contrast, the National Center for Health Statistics did not implement U07.2 for US mortality statistics; instead, all confirmed and suspected COVID-19 deaths are coded as U07.1. The openSAFELY analytic platform includes general practitioner practices that use electronic health record software SystemOne (1).

Our study employs the reported COVID-19 mortality ORs from Table A2 (fully adjusted COVID-19 deaths 2020) of Bhaskaran et al. (2021) to calculate a COVID-19 risk score that estimates each individual’s likelihood of dying from COVID-19, based on comorbidities associated with increased risk of COVID-19 mortality (2). We only incorporated risk factors that had ORs reported as statistically significant ( $P < 0.05$ ). In cases where there were multiple OR estimates that informed a single risk factor modeled by the microsimulation, such as cancer or diabetes, we used all the OR estimates provided that at least one was statistically significant. The estimates that we use in our study are listed in the third column of Supplement Table 1.

An individual’s risk score was defined as 1 multiplied by the product of the odds ratios corresponding to their comorbidities. An individual with no comorbidities thus has a risk score of 1, while an individual with a body mass index (BMI) of 35 and high blood pressure has a risk score of 1.30 ( $= 1.44 \times 0.90$ ) (Supplement Table 1). We used the exact OR estimates for the following comorbidities, which were defined analogously in both the openSAFELY study and our microsimulation: former smoker, high blood pressure, lung disease, heart disease, stroke, dementia, and BMI categories 30-35, 35-40 and 40+. The OR estimates for diabetes and cancer were reweighted to match the definitions in the microsimulation. The microsimulation includes a binary measure of cancer, but the openSAFELY study reports odds ratios for six different cancer groups: two types of cancer (haematological & non-haematological) crossed with three possible diagnosis windows (diagnosed < 1 year ago, diagnosed 1-4.9 years ago, and diagnosed 5 or more years ago). We employed the average of the log odds ratios of those six estimates, weighted by the populations reported in the openSAFELY study. We employed a similar weighted average for diabetes, which has three reported OR estimates in the openSAFELY study but is measured with a binary variable in our microsimulation.

The excess death data obtained from the CDC are available only in 5-year age groups. To increase precision, we used the estimates from Bhaskaran et al. to interpolate the distribution of excess deaths over single years of age within each 5-year age group. We accomplished this interpolation by first estimating a loglinear model of ORs provided for age categories in Bhaskaran et al. Age bins were converted to an average age (29 years for 18-39, 44.5 for 40-49, 54.5 for 50-59, 64.5 for 60-69, and 74.5 for 70-79; 80+ group is omitted), and the model was fitted with age as independent variable and the log COVID-19 mortality OR as dependent variable:

$$\log OR = \alpha + \beta AGE + e$$

This regression yielded the estimates  $\hat{\alpha} = -5.845$  (95% CI,  $-6.148$  to  $-5.542$ ) and  $\hat{\beta} = 0.105$  (95% CI,  $0.101$  to  $0.110$ ). We then applied the predicted value to each individual’s COVID-19 mortality risk score.

Finally, our COVID-19 risk score also accounts for whether the individual resides in a nursing home, since nursing home deaths represent a large share of total deaths. To calculate the odds ratio for this comorbidity, we first obtained data on the number of COVID-19 deaths among residents in certified Medicare skilled nursing facilities/Medicaid nursing facilities. Data from the Centers for Medicare & Medicaid Services (CMS) were retrieved from:

<https://data.cms.gov/Special-Programs-Initiatives-COVID-19-Nursing-Home/COVID-19-Nursing-Home-Dataset/s2uc-8wxxp>.

This dataset reported that there were 130,296 COVID-19 deaths among residents of nursing homes between January 1, 2020 and March 13, 2021. These data allow us to compute the share of total COVID-19 deaths that occurred in nursing homes. We then solved for the odds ratio that, when applied to our COVID-19 risk score, yielded a distribution of decedents consistent with this share.

## Section 3. Methods

We rely on an established microsimulation framework to calculate years of life lost (YLLs). The Future Elderly Model (FEM) and Future Adult Model (FAM) are dynamic microsimulation models based on biennial, longitudinal, nationally representative survey data for the United States. The FEM and FAM have been validated extensively with regards to trends in chronic disease prevalence, disease risk factors like BMI and smoking, functional limitations, quality-of-life, and mortality. The FEM relies primarily on the Health and Retirement Study (HRS), a nationally representative household survey of Americans over the age of fifty. The FAM is based on the Panel Study of Income Dynamics (PSID), a nationally representative survey of Americans of all ages. Both simulations model individuals' health risk factors, chronic illness incidence, limitations in function, mortality, and more over the life course. Full details, including model validation, are available in Supplement 2 and Supplement 4. The data and code used to produce the estimates for our study are publicly available from our Subversion repository:

[https://schweb.lahrc.lahealthresearchcloud.org/svn/AIM\\_covid/](https://schweb.lahrc.lahealthresearchcloud.org/svn/AIM_covid/)

Some datasets, such as the survey input data for the simulation (e.g. PSID, HRS), must be retrieved from the original sources because our Data Use Agreements do not allow us to redistribute them.

Our analysis measures YLLs and quality-adjusted life years (QALYs) lost relative to baseline. The projected life expectancy for each excess death is the number of life-years lived in the microsimulation under the assumption of zero excess deaths. Summing projected life expectancy across all excess deaths then yields the total YLLs. QALYs lost are calculated by summing the quality-of-life index. Both YLLs and QALYs lost are undiscounted. We use the FAM to estimate YLLs and QALYs lost for people ages 25 to 54 in 2020, and the FEM for people ages 55+ in 2020.

FAM simulations begin in 2009 and are replenished with cohorts of 25-year-olds through 2021. Incoming 25-year-old simulants are based on PSID respondents but have their sample weights adjusted to match demographic characteristics from US Census Projections (3). FAM simulations end in 2117. FEM simulations are started in 2016 with individuals ages 51+ as of that year, without replenishing cohorts. FEM simulations end in 2086. Together, the FEM and FAM include 28,175 simulants, which differ along numerous socioeconomic and health dimensions and are weighted to be nationally representative of the 223 million US adults ages 25+ and alive as of July 1, 2020.

To increase precision, the simulations are repeated using 150 Monte Carlo replications and then averaged when estimating the distributions of future outcomes. To quantify YLLs and QALYs lost from COVID-19 and non-COVID-19 excess deaths, we assign those deaths to individuals in the microsimulation's output for the 2020 calendar year, based on their demographics and health characteristics. The assignment of excess deaths based on age-sex-race/ethnicity and health is accomplished by appropriately adjusting the simulants' weights, and varied across our three analyses as described below.

The first analysis assumes that all COVID-19 and non-COVID-19 excess deaths occur randomly within each age-sex-race/ethnicity subgroup. No distinction was made between COVID-19 excess deaths and non-COVID-19 excess deaths. This "Average Risk" analysis is analogous to calculating YLLs using a life table that adjusts for the age, sex, and race/ethnicity of the decedent.

The second analysis, which serves as our preferred (baseline) approach, matches the distribution of COVID-19 excess deaths within each subgroup to the mortality odds ratios estimated for each of 12 different COVID-19 risk factors. Specifically, we assume that COVID-19 excess deaths are distributed in the subgroup in proportion to individuals' COVID-19 risk score, which was constructed using COVID-19 mortality odds ratios as described above. We assume that non-COVID-19 deaths are distributed according to the baseline mortality risk framework employed in the FEM and FAM. Thus, this approach distinguishes between risk factors associated with COVID-19 and those associated with non-COVID-19 excess deaths.

In the third analysis, we assume that all excess deaths (both COVID-19 and non-COVID-19) occur among the simulants with the highest mortality rate within each subgroup, as estimated by the microsimulation model. This “Frailty-Based Risk” analysis assumes that only the frailest individuals died. To accomplish this, we first ranked individuals by mortality risk, as estimated by the FEM and FAM, within their age-sex-race/ethnicity subgroup. In each age-sex-race/ethnicity subgroup, we then systematically selected the highest mortality risk individuals until all excess deaths were accounted for. No distinction was made between COVID-19 excess deaths and non-COVID-19 excess deaths.

Comparing our preferred Individualized Risk analysis to the alternative Frailty-Based Risk and Average Risk analyses clarifies the extent to which COVID-19 mortality afflicts those with below-average versus average longevity for their demographic subgroup.

### 3.1 Measuring outcomes

#### *Years of Life Lost (YLLs)*

For the Average Risk, Individualized Risk, and Frailty-Based Risk analyses, YLLs for each excess death are equal to the number of life-years lived in the microsimulation under the counterfactual assumption of zero excess deaths. Deaths are determined at 2-year intervals in the microsimulation. For the Average Risk and Individualized Risk analyses, counterfactual deaths were assumed to occur at the midpoint of the relevant 2-year interval. For the Frailty-Based Risk analysis, we conservatively assumed that counterfactual deaths occurred at the beginning of the 2-year interval, which minimizes the potential number of YLLs.

In the period life table analysis reported in Table 1 of the main text, we project life expectancy using 2018 CDC period life tables that adjust for single year of age, sex, and race/ethnicity. These tables are publicly available online:

[https://ftp.cdc.gov/pub/Health\\_Statistics/NCHS/Publications/NVSR/69-12](https://ftp.cdc.gov/pub/Health_Statistics/NCHS/Publications/NVSR/69-12) (tables 5,6, 8, 9, 11 and 12)

Our YLL estimates are based on  $e(x)$ , the average number of years of life remaining at exact age  $x$ .

#### *Quality-Adjusted Life Years (QALYs) lost*

Quality-of-life is measured using the EuroQol five dimensions questionnaire (EQ-5D). These five dimensions are based on five survey questions that elicit the extent of a respondent’s problems with mobility, self-care, daily activities, pain, and anxiety/depression. These questions are then weighted using stated preference data to compute the relative importance of each one and combined to create a single quality-of-life measure that is anchored at 0 (equivalent to death) and 1 (perfect health) (4). This index is first measured using the Medical Expenditure Panel Survey (MEPS), and then mapped to the HRS and PSID using variables common to both databases (Section 9.2 of Supplement 2).

QALYs lost for each excess death is calculated by summing the EQ-5D index over the years for which the individual is alive in the counterfactual model.

### 3.2 Assessing uncertainty

We employ two approaches to quantify uncertainty in our analyses. The first stems from uncertainty in the transition models used for the microsimulation models and the second stems from uncertainty in COVID-19 mortality odds ratio estimates. We employ a nonparametric bootstrap approach to create 50 separate sets of transition model estimates for use in the microsimulation, each of which is simulated 150 times in a Monte Carlo fashion (5). Uncertainty in the COVID-19 mortality ORs is incorporated by drawing from a multivariate normal distribution of the underlying parameters from the logistic model. Distributions of risk factors that consist of multiple subcategories in Bhaskaran et al. (cancer and diabetes) were created by weighted draws of the underlying distributions (2). The underlying distribution was based on the variance-covariance matrix from Bhaskaran et al. (2021), as provided by the authors. These draws are randomly paired with the nonparametric bootstrap transition

estimates. Results from each bootstrapped simulation are then used to calculate 95% uncertainty intervals around the mean outcomes.

## **Section 4. Additional Results**

Supplement Table 2 and Supplement Table 3 report the lower and upper bounds of the 95% percent uncertainty interval corresponding to the estimates presented in Table 1 of the main text, respectively.

Supplement Table 4 and Supplement Table 5 report the lower and upper bounds of the 95% percent uncertainty interval corresponding to the estimates presented in Table 2 of the main text, respectively.

Supplement Table 6 reports YLLs and QALYs lost by COVID-19 vs. non-COVID-19 excess deaths and 10-year age group. Supplement Table 7 and Supplement Table 8 report the lower and upper bounds of the 95% uncertainty interval corresponding to the estimates presented in Supplement Table 6.

Supplement Figure 1 illustrates the prevalence of COVID-19 related comorbidities in the US population for different age groups, as estimated by the FEM and FAM. Supplement Figure 2, Supplement Figure 3, and Supplement Figure 4 present corresponding prevalence estimates separately for Blacks, Hispanics, and Whites.

Supplement Figure 5 shows how the estimated distribution from Figure 2 of the main text varies by sex and race/ethnicity, for ages 26-64 and ages 65+.

Supplement Figure 6 and Supplement Figure 7 report the corresponding versions of Figure 3 of the main text, for the Average Risk and Frailty-Based Risk analyses.

Supplement Figure 8 reports the number of quality-adjusted life-years lost per 10,000, by age group, sex, and race/ethnicity, for the Individualized Risk analysis.

Supplement Figure 9 and Supplement Figure 10 report the corresponding versions of Figure 4 of the main text, for the Average Risk and Frailty-Based Risk analyses.



**Supplement Table 1. COVID-19 mortality odds ratios for different comorbidities**

| Comorbidity                           | FEM/FAM definition                                                                                                                                                                                                                                                                    | Odds ratio (95% CI) | Source                                                                                                                                                                                                                                                      | Notes                                                                                                         |
|---------------------------------------|---------------------------------------------------------------------------------------------------------------------------------------------------------------------------------------------------------------------------------------------------------------------------------------|---------------------|-------------------------------------------------------------------------------------------------------------------------------------------------------------------------------------------------------------------------------------------------------------|---------------------------------------------------------------------------------------------------------------|
| $30 \leq BMI < 35$                    | Derived from “How tall are you?” and “How much do you weigh?” (FAM) or “About how tall are you?” and “About how much do you weigh?” (FEM)                                                                                                                                             | 1.07 (1.03-1.12)    | Bhaskaran et al. (2021)                                                                                                                                                                                                                                     |                                                                                                               |
| $35 \leq BMI < 40$                    |                                                                                                                                                                                                                                                                                       | 1.44 (1.36-1.54)    | Bhaskaran et al. (2021)                                                                                                                                                                                                                                     |                                                                                                               |
| $40 \leq BMI$                         |                                                                                                                                                                                                                                                                                       | 2.11 (1.93-2.29)    | Bhaskaran et al. (2021)                                                                                                                                                                                                                                     |                                                                                                               |
| Former smoker (excl. current smokers) | Derived from “Did you ever smoke cigarettes?” & “Do you smoke cigarettes?”                                                                                                                                                                                                            | 1.26 (1.22-1.30)    | Bhaskaran et al. (2021)                                                                                                                                                                                                                                     |                                                                                                               |
| High blood pressure                   | “Has a doctor ever told you that you have high blood pressure or hypertension?”                                                                                                                                                                                                       | 0.90 (0.87-0.94)    | Bhaskaran et al. (2021)                                                                                                                                                                                                                                     | Source definition: systolic $\geq$ 140 mm Hg or diastolic $\geq$ 90 mm Hg                                     |
| Lung disease                          | “Not including asthma, has a doctor ever told you that you have chronic lung disease such as chronic bronchitis or emphysema?”                                                                                                                                                        | 1.66 (1.59-1.73)    | Bhaskaran et al. (2021)                                                                                                                                                                                                                                     | Excluding asthma                                                                                              |
| Heart disease                         | “Has a doctor ever told you that you have had a heart attack, coronary heart disease, angina, congestive heart failure, or other heart problems?”                                                                                                                                     | 1.23 (1.19-1.27)    | Bhaskaran et al. (2021)                                                                                                                                                                                                                                     |                                                                                                               |
| Diabetes                              | “Has a doctor ever told you that you have diabetes or high blood sugar?”                                                                                                                                                                                                              | 1.41 (1.36-1.46)    | Bhaskaran et al. (2021)                                                                                                                                                                                                                                     | Weighted average of HbA1c < 58 mmol/mol, HbA1c $\geq$ 58 mmol/mol, and no recent HbA1c measure                |
| Cancer                                | “Has a doctor ever told you that you have cancer or a malignant tumor?” (FAM)<br>“Has a doctor ever told you that you have cancer or a malignant tumor, excluding minor skin cancer?” (FEM)                                                                                           | 1.12 (1.08-1.16)    | Bhaskaran et al. (2021)                                                                                                                                                                                                                                     | Weighted average of all haematological and non-haematological cancers, with diagnosis at any time in the past |
| Stroke                                | “Has a doctor ever told you that you have had a stroke?”                                                                                                                                                                                                                              | 1.53 (1.46-1.59)    | Bhaskaran et al. (2021)                                                                                                                                                                                                                                     |                                                                                                               |
| Dementia                              | Based on Telephone Interview for Cognitive Status (TICS) or proxy respondents(6)                                                                                                                                                                                                      | 3.62 (3.41-3.84)    | Bhaskaran et al. (2021)                                                                                                                                                                                                                                     |                                                                                                               |
| Nursing home                          | “Are you living in a nursing home or other health care facility? Def: A nursing home or other health facility provides all of the following services for its residents: dispensing of medication, 24-hour nursing assistance and supervision, personal assistance, and room & meals.” | 2.45 (2.20-2.69)    | CMS (2021)<br><a href="https://data.cms.gov/Special-Programs-Initiatives-COVID-19-Nursing-Home/COVID-19-Nursing-Home-Dataset/s2uc-8wxp">https://data.cms.gov/Special-Programs-Initiatives-COVID-19-Nursing-Home/COVID-19-Nursing-Home-Dataset/s2uc-8wxp</a> | Sum of all deaths reported in “residents_weekly_covid_19” for all locations                                   |

The first column lists the 12 COVID-19-related comorbidities accounted for in the Individualized Risk analysis. The second column describes how the comorbidity is measured in the surveys underlying the Future Elderly Model and Future Adult Model microsimulations. The third column reports the mortality odds ratio used to construct the COVID-19 risk score. The odds ratio is obtained either from Bhaskaran et al. (2021) or from a calibration exercise using nursing home deaths obtained from CMS (2021) (2, 7). BMI: body mass index.

**Supplement Table 2. Lower bound of 95% uncertainty interval: years of life lost and quality-adjusted life-years lost due the US COVID-19 pandemic, by age group, sex, and race/ethnicity**

| Outcome                      | Totals     |          |          | Ages 25-64 |          |       |       |          |       | Ages 65+ |          |       |       |          |       |   |   |
|------------------------------|------------|----------|----------|------------|----------|-------|-------|----------|-------|----------|----------|-------|-------|----------|-------|---|---|
|                              | Ages 25-64 | Ages 65+ | Ages 25+ | Female     |          |       | Male  |          |       | Female   |          |       | Male  |          |       |   |   |
|                              |            |          |          | Black      | Hispanic | White | Black | Hispanic | White | Black    | Hispanic | White | Black | Hispanic | White |   |   |
| Population, thousands        | .          | .        | .        | .          | .        | .     | .     | .        | .     | .        | .        | .     | .     | .        | .     | . | . |
| <b>CDC excess deaths</b>     |            |          |          |            |          |       |       |          |       |          |          |       |       |          |       |   |   |
| Deaths                       | .          | .        | .        | .          | .        | .     | .     | .        | .     | .        | .        | .     | .     | .        | .     | . | . |
| COVID-19                     | .          | .        | .        | .          | .        | .     | .     | .        | .     | .        | .        | .     | .     | .        | .     | . | . |
| Non-COVID-19                 | .          | .        | .        | .          | .        | .     | .     | .        | .     | .        | .        | .     | .     | .        | .     | . | . |
| Deaths per 10k               | .          | .        | .        | .          | .        | .     | .     | .        | .     | .        | .        | .     | .     | .        | .     | . | . |
| COVID-19                     | .          | .        | .        | .          | .        | .     | .     | .        | .     | .        | .        | .     | .     | .        | .     | . | . |
| Non-COVID-19                 | .          | .        | .        | .          | .        | .     | .     | .        | .     | .        | .        | .     | .     | .        | .     | . | . |
| <b>Longitudinal outcomes</b> |            |          |          |            |          |       |       |          |       |          |          |       |       |          |       |   |   |
| <b>YLL, thousands</b>        |            |          |          |            |          |       |       |          |       |          |          |       |       |          |       |   |   |
| Period life table            | .          | .        | .        | .          | .        | .     | .     | .        | .     | .        | .        | .     | .     | .        | .     | . | . |
| Average Risk                 | 5,043      | 5,354    | 10,432   | 428        | 442      | 788   | 768   | 1,100    | 1,452 | 417      | 375      | 1,703 | 391   | 462      | 1,921 |   |   |
| Individualized Risk          | 4,560      | 4,339    | 8,939    | 378        | 407      | 694   | 690   | 1,018    | 1,313 | 327      | 301      | 1,354 | 317   | 387      | 1,579 |   |   |
| Frailty-Based Risk           | 2,338      | 1,072    | 3,465    | 177        | 231      | 229   | 386   | 643      | 573   | 88       | 90       | 291   | 78    | 123      | 325   |   |   |
| QALYs lost, thousands        |            |          |          |            |          |       |       |          |       |          |          |       |       |          |       |   |   |
| Average Risk                 | 3,951      | 3,877    | 7,858    | 321        | 338      | 621   | 599   | 871      | 1,152 | 287      | 256      | 1,239 | 280   | 331      | 1,419 |   |   |
| Individualized Risk          | 3,485      | 2,990    | 6,508    | 274        | 304      | 528   | 525   | 792      | 1,016 | 211      | 191      | 933   | 216   | 264      | 1,115 |   |   |
| Frailty-Based Risk           | 1,592      | 543      | 2,170    | 110        | 152      | 140   | 262   | 471      | 388   | 41       | 44       | 142   | 39    | 67       | 161   |   |   |
| YLL per 10k                  |            |          |          |            |          |       |       |          |       |          |          |       |       |          |       |   |   |
| Period life table            | .          | .        | .        | .          | .        | .     | .     | .        | .     | .        | .        | .     | .     | .        | .     | . | . |
| Average Risk                 | 301        | 972      | 468      | 381        | 316      | 134   | 750   | 699      | 251   | 1,423    | 1,451    | 682   | 1,949 | 2,280    | 940   |   |   |
| Individualized Risk          | 272        | 789      | 401      | 337        | 291      | 118   | 674   | 646      | 226   | 1,117    | 1,163    | 543   | 1,596 | 1,903    | 774   |   |   |
| Frailty-Based Risk           | 139        | 195      | 155      | 158        | 166      | 39    | 376   | 408      | 99    | 300      | 346      | 116   | 392   | 606      | 159   |   |   |
| QALYs lost per 10k           |            |          |          |            |          |       |       |          |       |          |          |       |       |          |       |   |   |
| Average Risk                 | 235        | 704      | 352      | 286        | 242      | 106   | 585   | 553      | 199   | 980      | 987      | 497   | 1,394 | 1,634    | 693   |   |   |
| Individualized Risk          | 208        | 544      | 292      | 244        | 218      | 90    | 513   | 503      | 175   | 719      | 737      | 374   | 1,088 | 1,295    | 546   |   |   |
| Frailty-Based Risk           | 95         | 98       | 97       | 98         | 109      | 24    | 256   | 299      | 67    | 140      | 171      | 57    | 197   | 328      | 79    |   |   |

This table reports the lower bound of the 95% uncertainty interval for the estimates presented in Table 1 of the main text. Uncertainty intervals were obtained by performing a non-parametric bootstrap that resampled the data underlying the Future Elderly Model and Future Adult Model and drew COVID-19 mortality odds ratios from an independent multivariate normal distribution. YLL: years of life lost. QALYs: quality-adjusted life-years.

**Supplement Table 3. Upper bound of 95% uncertainty interval: years of life lost and quality-adjusted life-years lost due the US COVID-19 pandemic, by age group, sex, and race/ethnicity**

| Outcome                      | Totals     |          |          | Ages 25-64 |          |       |       |          |       | Ages 65+ |          |       |       |          |       |   |   |
|------------------------------|------------|----------|----------|------------|----------|-------|-------|----------|-------|----------|----------|-------|-------|----------|-------|---|---|
|                              | Ages 25-64 | Ages 65+ | Ages 25+ | Female     |          |       | Male  |          |       | Female   |          |       | Male  |          |       |   |   |
|                              |            |          |          | Black      | Hispanic | White | Black | Hispanic | White | Black    | Hispanic | White | Black | Hispanic | White |   |   |
| Population, thousands        | .          | .        | .        | .          | .        | .     | .     | .        | .     | .        | .        | .     | .     | .        | .     | . | . |
| <b>CDC excess deaths</b>     |            |          |          |            |          |       |       |          |       |          |          |       |       |          |       |   |   |
| Deaths                       | .          | .        | .        | .          | .        | .     | .     | .        | .     | .        | .        | .     | .     | .        | .     | . | . |
| COVID-19                     | .          | .        | .        | .          | .        | .     | .     | .        | .     | .        | .        | .     | .     | .        | .     | . | . |
| Non-COVID-19                 | .          | .        | .        | .          | .        | .     | .     | .        | .     | .        | .        | .     | .     | .        | .     | . | . |
| Deaths per 10k               | .          | .        | .        | .          | .        | .     | .     | .        | .     | .        | .        | .     | .     | .        | .     | . | . |
| COVID-19                     | .          | .        | .        | .          | .        | .     | .     | .        | .     | .        | .        | .     | .     | .        | .     | . | . |
| Non-COVID-19                 | .          | .        | .        | .          | .        | .     | .     | .        | .     | .        | .        | .     | .     | .        | .     | . | . |
| <b>Longitudinal outcomes</b> |            |          |          |            |          |       |       |          |       |          |          |       |       |          |       |   |   |
| <b>YLL, thousands</b>        |            |          |          |            |          |       |       |          |       |          |          |       |       |          |       |   |   |
| Period life table            | .          | .        | .        | .          | .        | .     | .     | .        | .     | .        | .        | .     | .     | .        | .     | . | . |
| Average Risk                 | 5,223      | 5,504    | 10,692   | 446        | 488      | 812   | 827   | 1,214    | 1,503 | 453      | 405      | 1,774 | 439   | 505      | 2,012 |   |   |
| Individualized Risk          | 4,776      | 4,485    | 9,221    | 400        | 456      | 726   | 750   | 1,141    | 1,364 | 356      | 335      | 1,414 | 358   | 424      | 1,671 |   |   |
| Frailty-Based Risk           | 2,605      | 1,218    | 3,768    | 212        | 292      | 276   | 468   | 799      | 656   | 113      | 111      | 356   | 111   | 167      | 436   |   |   |
| <b>QALYs lost, thousands</b> |            |          |          |            |          |       |       |          |       |          |          |       |       |          |       |   |   |
| Average Risk                 | 4,098      | 3,991    | 8,060    | 335        | 375      | 641   | 641   | 962      | 1,195 | 314      | 280      | 1,293 | 315   | 364      | 1,490 |   |   |
| Individualized Risk          | 3,663      | 3,102    | 6,732    | 290        | 343      | 556   | 568   | 891      | 1,061 | 232      | 222      | 982   | 246   | 294      | 1,187 |   |   |
| Frailty-Based Risk           | 1,784      | 637      | 2,385    | 131        | 195      | 170   | 320   | 588      | 446   | 56       | 57       | 180   | 61    | 97       | 235   |   |   |
| <b>YLL per 10k</b>           |            |          |          |            |          |       |       |          |       |          |          |       |       |          |       |   |   |
| Period life table            | .          | .        | .        | .          | .        | .     | .     | .        | .     | .        | .        | .     | .     | .        | .     | . | . |
| Average Risk                 | 311        | 996      | 479      | 398        | 348      | 139   | 801   | 767      | 259   | 1,529    | 1,547    | 706   | 2,137 | 2,481    | 976   |   |   |
| Individualized Risk          | 284        | 810      | 413      | 356        | 325      | 124   | 727   | 721      | 235   | 1,201    | 1,282    | 563   | 1,730 | 2,093    | 809   |   |   |
| Frailty-Based Risk           | 155        | 220      | 169      | 189        | 209      | 47    | 454   | 505      | 113   | 383      | 425      | 142   | 538   | 822      | 211   |   |   |
| <b>QALYs lost per 10k</b>    |            |          |          |            |          |       |       |          |       |          |          |       |       |          |       |   |   |
| Average Risk                 | 244        | 722      | 361      | 298        | 268      | 109   | 621   | 608      | 206   | 1,059    | 1,073    | 514   | 1,540 | 1,786    | 723   |   |   |
| Individualized Risk          | 218        | 560      | 302      | 259        | 245      | 95    | 550   | 563      | 183   | 783      | 851      | 390   | 1,189 | 1,447    | 575   |   |   |
| Frailty-Based Risk           | 106        | 115      | 107      | 117        | 139      | 29    | 311   | 372      | 77    | 190      | 218      | 72    | 296   | 478      | 114   |   |   |

This table reports the upper bound of the 95% uncertainty interval for the estimates presented in Table 1 of the main text. Uncertainty intervals were obtained by performing a non-parametric bootstrap that resampled the data underlying the Future Elderly Model and Future Adult Model and drew COVID-19 mortality odds ratios from an independent multivariate normal distribution. YLL: years of life lost. QALYs: quality-adjusted life-years.

**Supplement Table 4. Lower bound of 95% uncertainty interval: years of life lost and quality-adjusted life-years lost due the US COVID-19 pandemic, by 10-year age group**

| Outcome               | Age    |       |       |       |       |       |       |       |
|-----------------------|--------|-------|-------|-------|-------|-------|-------|-------|
|                       | 25+    | 25-34 | 35-44 | 45-54 | 55-64 | 65-74 | 75-84 | 85+   |
| Population, thousands | .      | .     | .     | .     | .     | .     | .     | .     |
| CDC excess deaths     |        |       |       |       |       |       |       |       |
| Deaths                | .      | .     | .     | .     | .     | .     | .     | .     |
| COVID-19              | .      | .     | .     | .     | .     | .     | .     | .     |
| Non-COVID-19          | .      | .     | .     | .     | .     | .     | .     | .     |
| Deaths per 10k        | .      | .     | .     | .     | .     | .     | .     | .     |
| COVID-19              | .      | .     | .     | .     | .     | .     | .     | .     |
| Non-COVID-19          | .      | .     | .     | .     | .     | .     | .     | .     |
| Longitudinal outcomes |        |       |       |       |       |       |       |       |
| YLL, thousands        |        |       |       |       |       |       |       |       |
| Period life table     | .      | .     | .     | .     | .     | .     | .     | .     |
| Average Risk          | 10,432 | 867   | 1,166 | 1,031 | 1,954 | 2,636 | 1,799 | 899   |
| Individualized Risk   | 8,939  | 824   | 1,058 | 965   | 1,686 | 2,214 | 1,481 | 623   |
| Frailty-Based Risk    | 3,465  | 658   | 683   | 530   | 410   | 564   | 361   | 125   |
| QALYs lost, thousands |        |       |       |       |       |       |       |       |
| Average Risk          | 7,858  | 704   | 934   | 818   | 1,476 | 1,963 | 1,293 | 603   |
| Individualized Risk   | 6,508  | 659   | 824   | 751   | 1,230 | 1,586 | 1,011 | 376   |
| Frailty-Based Risk    | 2,170  | 498   | 478   | 359   | 217   | 294   | 179   | 58    |
| YLL per 10k           |        |       |       |       |       |       |       |       |
| Period life table     | .      | .     | .     | .     | .     | .     | .     | .     |
| Average Risk          | 468    | 196   | 285   | 254   | 463   | 813   | 1,105 | 1,371 |
| Individualized Risk   | 401    | 187   | 259   | 238   | 400   | 683   | 911   | 949   |
| Frailty-Based Risk    | 155    | 149   | 167   | 131   | 97    | 174   | 223   | 192   |
| QALYs lost per 10k    |        |       |       |       |       |       |       |       |
| Average Risk          | 352    | 159   | 229   | 201   | 350   | 606   | 794   | 919   |
| Individualized Risk   | 292    | 149   | 201   | 185   | 292   | 490   | 622   | 573   |
| Frailty-Based Risk    | 97     | 113   | 117   | 89    | 52    | 91    | 110   | 90    |

This table reports the lower bound of the 95% uncertainty interval for the estimates presented in Table 2 of the main text. Uncertainty intervals were obtained by performing a non-parametric bootstrap that resampled the data underlying the Future Elderly Model and Future Adult Model and drew COVID-19 mortality odds ratios from an independent multivariate normal distribution. YLL: years of life lost. QALYs: quality-adjusted life-years.

**Supplement Table 5. Upper bound of 95% uncertainty interval: years of life lost and quality-adjusted life-years lost due the US COVID-19 pandemic, by 10-year age group**

| Outcome                      | Age    |       |       |       |       |       |       |       |
|------------------------------|--------|-------|-------|-------|-------|-------|-------|-------|
|                              | 25+    | 25-34 | 35-44 | 45-54 | 55-64 | 65-74 | 75-84 | 85+   |
| Population, thousands        | .      | .     | .     | .     | .     | .     | .     | .     |
| <b>CDC excess deaths</b>     |        |       |       |       |       |       |       |       |
| Deaths                       | .      | .     | .     | .     | .     | .     | .     | .     |
| COVID-19                     | .      | .     | .     | .     | .     | .     | .     | .     |
| Non-COVID-19                 | .      | .     | .     | .     | .     | .     | .     | .     |
| Deaths per 10k               | .      | .     | .     | .     | .     | .     | .     | .     |
| COVID-19                     | .      | .     | .     | .     | .     | .     | .     | .     |
| Non-COVID-19                 | .      | .     | .     | .     | .     | .     | .     | .     |
| <b>Longitudinal outcomes</b> |        |       |       |       |       |       |       |       |
| YLL, thousands               |        |       |       |       |       |       |       |       |
| Period life table            | .      | .     | .     | .     | .     | .     | .     | .     |
| Average Risk                 | 10,692 | 905   | 1,222 | 1,106 | 2,015 | 2,722 | 1,864 | 938   |
| Individualized Risk          | 9,221  | 867   | 1,124 | 1,043 | 1,768 | 2,299 | 1,555 | 652   |
| Frailty-Based Risk           | 3,768  | 727   | 778   | 648   | 508   | 666   | 415   | 158   |
| QALYs lost, thousands        |        |       |       |       |       |       |       |       |
| Average Risk                 | 8,060  | 735   | 981   | 877   | 1,526 | 2,032 | 1,346 | 631   |
| Individualized Risk          | 6,732  | 693   | 878   | 812   | 1,301 | 1,653 | 1,071 | 395   |
| Frailty-Based Risk           | 2,385  | 551   | 547   | 442   | 283   | 362   | 213   | 75    |
| YLL per 10k                  |        |       |       |       |       |       |       |       |
| Period life table            | .      | .     | .     | .     | .     | .     | .     | .     |
| Average Risk                 | 479    | 205   | 299   | 273   | 477   | 839   | 1,152 | 1,445 |
| Individualized Risk          | 413    | 196   | 275   | 257   | 418   | 708   | 959   | 1,005 |
| Frailty-Based Risk           | 169    | 165   | 190   | 160   | 120   | 206   | 256   | 241   |
| QALYs lost per 10k           |        |       |       |       |       |       |       |       |
| Average Risk                 | 361    | 166   | 240   | 216   | 361   | 626   | 832   | 972   |
| Individualized Risk          | 302    | 157   | 215   | 200   | 308   | 509   | 661   | 609   |
| Frailty-Based Risk           | 107    | 125   | 134   | 109   | 67    | 111   | 131   | 114   |

This table reports the upper bound of the 95% uncertainty interval for the estimates presented in Table 2 of the main text. Uncertainty intervals were obtained by performing a non-parametric bootstrap that resampled the data underlying the Future Elderly Model and Future Adult Model and drew COVID-19 mortality odds ratios from an independent multivariate normal distribution. YLL: years of life lost. QALYs: quality-adjusted life-years.

**Supplement Table 6. Individualized Risk analysis: years of life lost and quality-adjusted life-years lost due to the US COVID-19 pandemic, by COVID-19 vs. non-COVID-19 excess deaths and 10-year age group**

| Outcome               | Age     |        |        |        |        |         |         |         |
|-----------------------|---------|--------|--------|--------|--------|---------|---------|---------|
|                       | 25+     | 25-34  | 35-44  | 45-54  | 55-64  | 65-74   | 75-84   | 85+     |
| Population, thousands | 223,092 | 44,195 | 40,899 | 40,589 | 42,228 | 32,432  | 16,228  | 6,522   |
| CDC excess deaths     |         |        |        |        |        |         |         |         |
| Deaths                | 740,247 | 18,136 | 29,977 | 34,455 | 91,427 | 180,021 | 197,977 | 188,254 |
| COVID-19              | 545,324 | 3,669  | 9,362  | 26,150 | 66,545 | 120,318 | 151,569 | 167,711 |
| Non-COVID-19          | 194,923 | 14,467 | 20,615 | 8,305  | 24,882 | 59,703  | 46,408  | 20,543  |
| Deaths per 10k        | 33.2    | 4.1    | 7.3    | 8.5    | 21.7   | 55.5    | 122.0   | 288.6   |
| COVID-19              | 24.4    | .8     | 2.3    | 6.4    | 15.8   | 37.1    | 93.4    | 257.1   |
| Non-COVID-19          | 8.7     | 3.3    | 5.0    | 2.0    | 5.9    | 18.4    | 28.6    | 31.5    |
| Longitudinal outcomes |         |        |        |        |        |         |         |         |
| YLL, thousands        |         |        |        |        |        |         |         |         |
| COVID-19 deaths       | 5,973   | 180    | 363    | 775    | 1,330  | 1,592   | 1,170   | 562     |
| Non-COVID-19 deaths   | 3,108   | 665    | 728    | 229    | 397    | 665     | 348     | 76      |
| QALYs lost, thousands |         |        |        |        |        |         |         |         |
| COVID-19 deaths       | 4,313   | 146    | 288    | 606    | 981    | 1,150   | 803     | 340     |
| Non-COVID-19 deaths   | 2,307   | 531    | 563    | 176    | 285    | 470     | 238     | 46      |
| YLL per 10k           |         |        |        |        |        |         |         |         |
| COVID-19 deaths       | 268     | 41     | 89     | 191    | 315    | 491     | 721     | 861     |
| Non-COVID-19 deaths   | 139     | 151    | 178    | 57     | 94     | 205     | 214     | 116     |
| QALYs lost per 10k    |         |        |        |        |        |         |         |         |
| COVID-19 deaths       | 193     | 33     | 70     | 149    | 232    | 354     | 495     | 521     |
| Non-COVID-19 deaths   | 103     | 120    | 138    | 43     | 67     | 145     | 147     | 70      |

This table reports the years of life lost (YLLs) and quality-adjusted life-years (QALYs) lost over the time period March 22, 2020 through March 13, 2021 as a result of the US COVID-19 pandemic. We report 95% uncertainty intervals in Tables 7-8 of Supplement 1. Population data were obtained from the Health and Retirement Study and the Panel Study of Income Dynamics. The longitudinal outcomes estimates presented in this table are based on the number of COVID and non-COVID excess deaths reported by the Centers for Disease Control and Prevention (CDC), which are reproduced in the second row. The YLLs and QALYs lost estimates for the Individualized Risk analysis are derived from the Future Elderly Model and the Future Adult Model, which use microsimulation to produce individual-level forecasts of mortality and quality-of-life for the US population ages 25+ (Figure 1 of the main text). The Individualized Risk analysis assigns all COVID-19-related excess deaths within the age-sex-race/ethnicity subgroup in proportion to estimates of COVID-19 comorbidity mortality odds ratios, and assigns non-COVID-19-related deaths in proportion to the 2020 (pre-COVID-19) annual mortality hazard projected by the microsimulation.

**Supplement Table 7. Lower bound of 95% uncertainty interval: Individualized Risk analysis: years of life lost and quality-adjusted life-years lost due the US COVID-19 pandemic, by COVID-19 vs. non-COVID-19 excess deaths and 10-year age group**

| Outcome                      | Age   |       |       |       |       |       |       |     |
|------------------------------|-------|-------|-------|-------|-------|-------|-------|-----|
|                              | 25+   | 25-34 | 35-44 | 45-54 | 55-64 | 65-74 | 75-84 | 85+ |
| Population, thousands        | .     | .     | .     | .     | .     | .     | .     | .   |
| <b>CDC excess deaths</b>     |       |       |       |       |       |       |       |     |
| Deaths                       | .     | .     | .     | .     | .     | .     | .     | .   |
| COVID-19                     | .     | .     | .     | .     | .     | .     | .     | .   |
| Non-COVID-19                 | .     | .     | .     | .     | .     | .     | .     | .   |
| Deaths per 10k               | .     | .     | .     | .     | .     | .     | .     | .   |
| COVID-19                     | .     | .     | .     | .     | .     | .     | .     | .   |
| Non-COVID-19                 | .     | .     | .     | .     | .     | .     | .     | .   |
| <b>Longitudinal outcomes</b> |       |       |       |       |       |       |       |     |
| YLL, thousands               |       |       |       |       |       |       |       |     |
| COVID-19 deaths              | 5,879 | 176   | 351   | 746   | 1,300 | 1,560 | 1,142 | 548 |
| Non-COVID-19 deaths          | 3,050 | 648   | 706   | 219   | 385   | 652   | 338   | 73  |
| QALYs lost, thousands        |       |       |       |       |       |       |       |     |
| COVID-19 deaths              | 4,239 | 142   | 277   | 583   | 955   | 1,124 | 780   | 331 |
| Non-COVID-19 deaths          | 2,262 | 517   | 545   | 168   | 274   | 460   | 230   | 44  |
| YLL per 10k                  |       |       |       |       |       |       |       |     |
| COVID-19 deaths              | 264   | 40    | 86    | 184   | 308   | 482   | 703   | 836 |
| Non-COVID-19 deaths          | 137   | 147   | 173   | 54    | 91    | 201   | 208   | 112 |
| QALYs lost per 10k           |       |       |       |       |       |       |       |     |
| COVID-19 deaths              | 190   | 32    | 68    | 144   | 226   | 347   | 480   | 504 |
| Non-COVID-19 deaths          | 101   | 117   | 133   | 41    | 65    | 142   | 141   | 68  |

This table reports the lower bound of the 95% uncertainty interval for the estimates presented in Table 6 of Supplement 1. Uncertainty intervals were obtained by performing a non-parametric bootstrap that resampled the data underlying the Future Elderly Model and Future Adult Model and drew COVID-19 mortality odds ratios from an independent multivariate normal distribution. YLL: years of life lost. QALYs: quality-adjusted life-years.

**Supplement Table 8. Upper bound of 95% uncertainty interval: Individualized Risk analysis: years of life lost and quality-adjusted life-years lost due the US COVID-19 pandemic, by COVID-19 vs. non-COVID-19 excess deaths and 10-year age group**

| Outcome                      | Age   |       |       |       |       |       |       |     |
|------------------------------|-------|-------|-------|-------|-------|-------|-------|-----|
|                              | 25+   | 25-34 | 35-44 | 45-54 | 55-64 | 65-74 | 75-84 | 85+ |
| Population, thousands        | .     | .     | .     | .     | .     | .     | .     | .   |
| <b>CDC excess deaths</b>     |       |       |       |       |       |       |       |     |
| Deaths                       | .     | .     | .     | .     | .     | .     | .     | .   |
| COVID-19                     | .     | .     | .     | .     | .     | .     | .     | .   |
| Non-COVID-19                 | .     | .     | .     | .     | .     | .     | .     | .   |
| Deaths per 10k               | .     | .     | .     | .     | .     | .     | .     | .   |
| COVID-19                     | .     | .     | .     | .     | .     | .     | .     | .   |
| Non-COVID-19                 | .     | .     | .     | .     | .     | .     | .     | .   |
| <b>Longitudinal outcomes</b> |       |       |       |       |       |       |       |     |
| YLL, thousands               |       |       |       |       |       |       |       |     |
| COVID-19 deaths              | 6,066 | 185   | 376   | 804   | 1,360 | 1,624 | 1,199 | 576 |
| Non-COVID-19 deaths          | 3,165 | 683   | 749   | 240   | 410   | 678   | 357   | 78  |
| QALYs lost, thousands        |       |       |       |       |       |       |       |     |
| COVID-19 deaths              | 4,387 | 150   | 298   | 629   | 1,007 | 1,176 | 826   | 348 |
| Non-COVID-19 deaths          | 2,353 | 544   | 581   | 184   | 295   | 480   | 246   | 48  |
| YLL per 10k                  |       |       |       |       |       |       |       |     |
| COVID-19 deaths              | 272   | 42    | 92    | 198   | 322   | 500   | 740   | 887 |
| Non-COVID-19 deaths          | 142   | 154   | 183   | 59    | 97    | 209   | 221   | 120 |
| QALYs lost per 10k           |       |       |       |       |       |       |       |     |
| COVID-19 deaths              | 197   | 34    | 73    | 155   | 238   | 362   | 510   | 538 |
| Non-COVID-19 deaths          | 105   | 123   | 142   | 45    | 70    | 148   | 152   | 73  |

This table reports the upper bound of the 95% uncertainty interval for the estimates presented in Table 6 of Supplement 1. Uncertainty intervals were obtained by performing a non-parametric bootstrap that resampled the data underlying the Future Elderly Model and Future Adult Model and drew COVID-19 mortality odds ratios from an independent multivariate normal distribution. YLL: years of life lost. QALYs: quality-adjusted life-years.



**Supplement Figure 1. Prevalence of risk factors in 2020 that are positively associated with COVID-19 mortality**

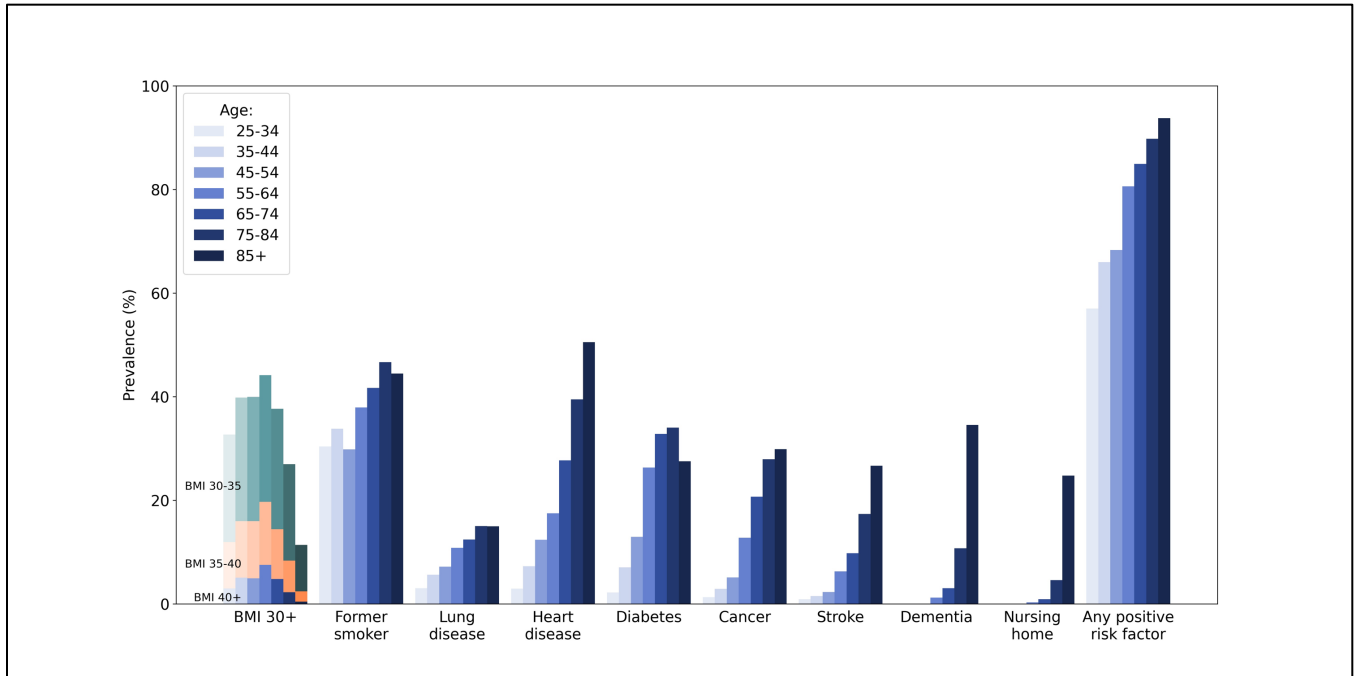

| Age (years)  | Prevalence in 2020, % (95% CI) |                       |                    |                       |                       |                       |                       |                       |                       |                       |                       |                          |
|--------------|--------------------------------|-----------------------|--------------------|-----------------------|-----------------------|-----------------------|-----------------------|-----------------------|-----------------------|-----------------------|-----------------------|--------------------------|
|              | BMI 30-35                      | BMI 35-40             | BMI 40+            | Former smoker         | Lung disease          | Heart disease         | Diabetes              | Cancer                | Stroke                | Dementia              | In nursing home       | Any positive risk factor |
| <b>25-34</b> | 20.7<br>(20.4 - 21.0)          | 8.9<br>(8.6 - 9.2)    | 3.0<br>(2.8 - 3.2) | 30.4<br>(29.4 - 31.4) | 3.0<br>(2.7 - 3.3)    | 3.0<br>(2.7 - 3.3)    | 2.2<br>(1.9 - 2.5)    | 1.3<br>(1.0 - 1.6)    | 0.9<br>(0.8 - 1.0)    | .                     | .                     | 57.0<br>(56.2 - 57.8)    |
| <b>35-44</b> | 23.8<br>(23.4 - 24.2)          | 10.9<br>(10.6 - 11.2) | 5.1<br>(4.7 - 5.5) | 33.8<br>(32.9 - 34.7) | 5.6<br>(5.1 - 6.1)    | 7.3<br>(6.8 - 7.8)    | 7.1<br>(6.4 - 7.8)    | 2.9<br>(2.5 - 3.3)    | 1.5<br>(1.3 - 1.7)    | .                     | .                     | 66.0<br>(65.4 - 66.6)    |
| <b>45-54</b> | 24.0<br>(23.5 - 24.5)          | 11.0<br>(10.7 - 11.3) | 4.9<br>(4.5 - 5.3) | 29.8<br>(29.1 - 30.5) | 7.2<br>(6.5 - 7.9)    | 12.4<br>(11.6 - 13.2) | 12.9<br>(12.0 - 13.8) | 5.1<br>(4.5 - 5.7)    | 2.3<br>(2.0 - 2.6)    | .                     | .                     | 68.3<br>(67.6 - 69.0)    |
| <b>55-64</b> | 24.5<br>(23.9 - 25.1)          | 12.2<br>(11.6 - 12.8) | 7.5<br>(6.8 - 8.2) | 37.9<br>(35.9 - 39.9) | 10.8<br>(9.6 - 12.0)  | 17.5<br>(16.5 - 18.5) | 26.3<br>(24.8 - 27.8) | 12.8<br>(11.4 - 14.2) | 6.3<br>(5.4 - 7.2)    | 1.2<br>(0.8 - 1.6)    | 0.3<br>(0.2 - 0.4)    | 80.6<br>(79.0 - 82.2)    |
| <b>65-74</b> | 23.2<br>(22.1 - 24.3)          | 9.6<br>(9.0 - 10.2)   | 4.8<br>(4.2 - 5.4) | 41.7<br>(39.4 - 44.0) | 12.4<br>(11.3 - 13.5) | 27.7<br>(25.9 - 29.5) | 32.8<br>(31.2 - 34.4) | 20.7<br>(19.5 - 21.9) | 9.8<br>(8.9 - 10.7)   | 3.0<br>(2.8 - 3.2)    | 0.9<br>(0.8 - 1.0)    | 84.9<br>(83.8 - 86.0)    |
| <b>75-84</b> | 18.6<br>(17.9 - 19.3)          | 6.1<br>(5.6 - 6.6)    | 2.3<br>(1.8 - 2.8) | 46.7<br>(44.1 - 49.3) | 15.0<br>(14.1 - 15.9) | 39.5<br>(37.5 - 41.5) | 34.0<br>(32.3 - 35.7) | 27.9<br>(26.3 - 29.5) | 17.4<br>(15.6 - 19.2) | 10.7<br>(10.1 - 11.3) | 4.6<br>(4.1 - 5.1)    | 89.8<br>(88.8 - 90.8)    |
| <b>85+</b>   | 9.0<br>(8.2 - 9.8)             | 2.0<br>(1.6 - 2.4)    | 0.4<br>(0.3 - 0.5) | 44.5<br>(40.8 - 48.2) | 15.0<br>(13.4 - 16.6) | 50.5<br>(47.8 - 53.2) | 27.5<br>(25.1 - 29.9) | 29.9<br>(27.6 - 32.2) | 26.7<br>(24.9 - 28.5) | 34.6<br>(33.0 - 36.2) | 24.8<br>(22.9 - 26.7) | 93.8<br>(92.6 - 95.0)    |

This figure reports the prevalence of different risk factors in the US adult population ages 25+ as of July 1, 2020. The estimates are produced by the Future Adult Model and the Future Elderly Model. The category “any positive risk factor” includes individuals who have at least one of the risk factors listed in the figure. 95% uncertainty intervals are given in parentheses. BMI: body mass index.

**Supplement Figure 2. Black population: prevalence of risk factors in 2020 that are positively associated with COVID-19 mortality**

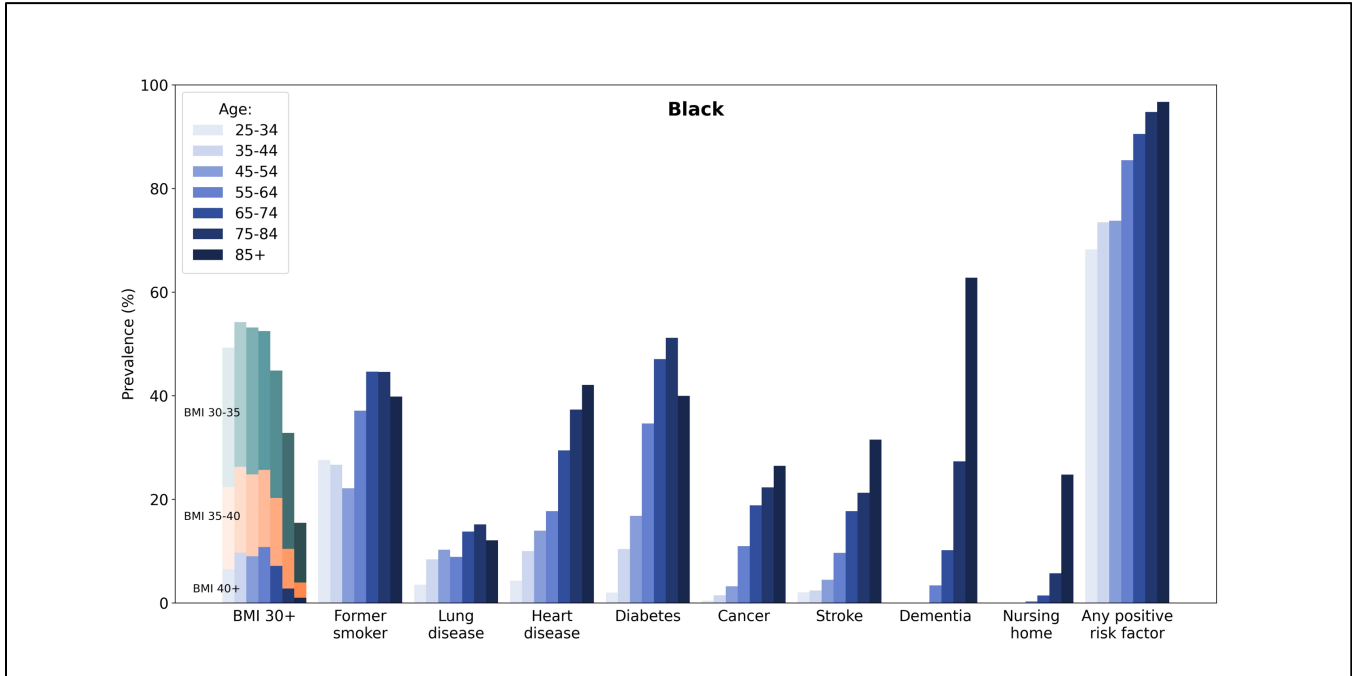

| Age (years)  | Prevalence in 2020, % (95% CI) |                       |                      |                       |                       |                       |                       |                       |                       |                       |                       |                          |
|--------------|--------------------------------|-----------------------|----------------------|-----------------------|-----------------------|-----------------------|-----------------------|-----------------------|-----------------------|-----------------------|-----------------------|--------------------------|
|              | BMI 30-35                      | BMI 35-40             | BMI 40+              | Former smoker         | Lung disease          | Heart disease         | Diabetes              | Cancer                | Stroke                | Dementia              | In nursing home       | Any positive risk factor |
| <b>25-34</b> | 26.9<br>(26.4 - 27.4)          | 15.9<br>(15.3 - 16.5) | 6.5<br>(6.1 - 6.9)   | 27.6<br>(26.2 - 29.0) | 3.5<br>(3.0 - 4.0)    | 4.3<br>(3.9 - 4.7)    | 2.0<br>(1.6 - 2.4)    | 0.4<br>(0.2 - 0.6)    | 2.1<br>(1.9 - 2.3)    | .                     | .                     | 68.2<br>(67.4 - 69.0)    |
| <b>35-44</b> | 27.9<br>(27.2 - 28.6)          | 16.6<br>(16.0 - 17.2) | 9.7<br>(9.2 - 10.2)  | 26.7<br>(25.6 - 27.8) | 8.4<br>(7.6 - 9.2)    | 10.0<br>(9.3 - 10.7)  | 10.4<br>(9.6 - 11.2)  | 1.5<br>(1.1 - 1.9)    | 2.4<br>(1.9 - 2.9)    | .                     | .                     | 73.5<br>(72.7 - 74.3)    |
| <b>45-54</b> | 28.4<br>(27.7 - 29.1)          | 15.8<br>(15.2 - 16.4) | 9.0<br>(8.4 - 9.6)   | 22.1<br>(21.3 - 22.9) | 10.3<br>(9.5 - 11.1)  | 13.9<br>(12.9 - 14.9) | 16.8<br>(15.5 - 18.1) | 3.2<br>(2.4 - 4.0)    | 4.4<br>(3.7 - 5.1)    | .                     | .                     | 73.7<br>(72.8 - 74.6)    |
| <b>55-64</b> | 26.8<br>(25.6 - 28.0)          | 14.9<br>(14.0 - 15.8) | 10.8<br>(9.3 - 12.3) | 37.1<br>(34.0 - 40.2) | 8.9<br>(7.4 - 10.4)   | 17.7<br>(15.6 - 19.8) | 34.6<br>(31.4 - 37.8) | 10.9<br>(8.9 - 12.9)  | 9.7<br>(7.6 - 11.8)   | 3.4<br>(2.2 - 4.6)    | 0.3<br>(0.2 - 0.4)    | 85.5<br>(84.1 - 86.9)    |
| <b>65-74</b> | 24.6<br>(22.7 - 26.5)          | 13.1<br>(11.6 - 14.6) | 7.1<br>(5.9 - 8.3)   | 44.6<br>(39.6 - 49.6) | 13.7<br>(11.6 - 15.8) | 29.5<br>(24.8 - 34.2) | 47.1<br>(42.9 - 51.3) | 18.8<br>(16.1 - 21.5) | 17.7<br>(14.9 - 20.5) | 10.2<br>(8.6 - 11.8)  | 1.4<br>(0.9 - 1.9)    | 90.5<br>(88.9 - 92.1)    |
| <b>75-84</b> | 22.4<br>(20.2 - 24.6)          | 7.6<br>(5.8 - 9.4)    | 2.8<br>(1.6 - 4.0)   | 44.6<br>(40.6 - 48.6) | 15.2<br>(10.5 - 19.9) | 37.3<br>(31.5 - 43.1) | 51.2<br>(44.9 - 57.5) | 22.3<br>(18.8 - 25.8) | 21.3<br>(18.3 - 24.3) | 27.3<br>(23.7 - 30.9) | 5.7<br>(3.8 - 7.6)    | 94.7<br>(92.6 - 96.8)    |
| <b>85+</b>   | 11.5<br>(8.6 - 14.4)           | 3.0<br>(1.8 - 4.2)    | 1.0<br>(0.4 - 1.6)   | 39.8<br>(30.3 - 49.3) | 12.1<br>(8.4 - 15.8)  | 42.1<br>(36.1 - 48.1) | 40.0<br>(33.2 - 46.8) | 26.5<br>(21.7 - 31.3) | 31.5<br>(25.5 - 37.5) | 62.7<br>(57.9 - 67.5) | 24.8<br>(21.0 - 28.6) | 96.7<br>(95.4 - 98.0)    |

This figure reports the prevalence of different risk factors in the US adult Black population ages 25+ as of July 1, 2020. The estimates are produced by the Future Adult Model and the Future Elderly Model. The category “any positive risk factor” includes individuals who have at least one of the risk factors listed in the figure. 95% uncertainty intervals are given in parentheses. BMI: body mass index.

**Supplement Figure 3. Hispanic population: prevalence of risk factors in 2020 that are positively associated with COVID-19 mortality**

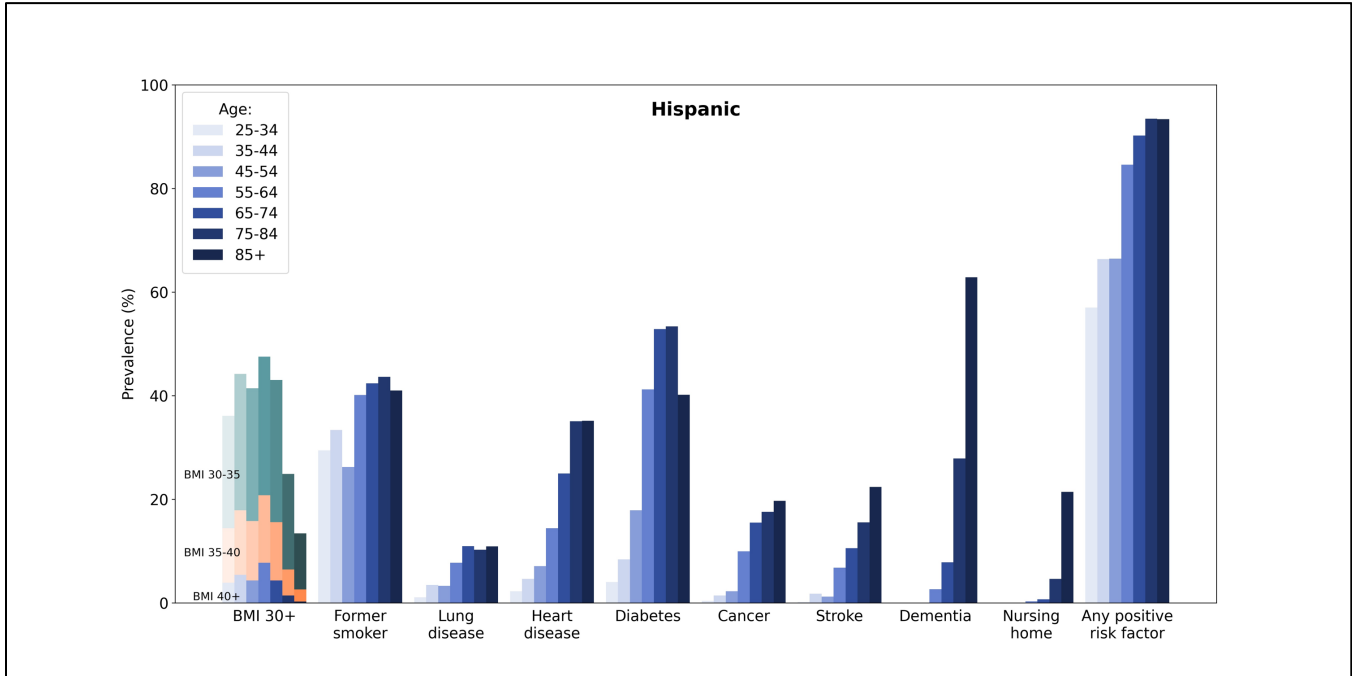

| Prevalence in 2020, % (95% CI) |               |               |              |               |              |               |               |               |               |               |                 |                          |  |
|--------------------------------|---------------|---------------|--------------|---------------|--------------|---------------|---------------|---------------|---------------|---------------|-----------------|--------------------------|--|
| Age (years)                    | BMI 30-35     | BMI 35-40     | BMI 40+      | Former smoker | Lung disease | Heart disease | Diabetes      | Cancer        | Stroke        | Dementia      | In nursing home | Any positive risk factor |  |
| <b>25-34</b>                   | 21.7          | 10.5          | 3.9          | 29.5          | 1.1          | 2.2           | 4.0           | 0.4           | 0.2           | .             | .               | 57.0                     |  |
|                                | (21.1 - 22.3) | (10.0 - 11.0) | (3.5 - 4.3)  | (27.2 - 31.8) | (0.7 - 1.5)  | (1.8 - 2.6)   | (3.3 - 4.7)   | (0.1 - 0.7)   | (0.1 - 0.3)   | .             | .               | (55.1 - 58.9)            |  |
| <b>35-44</b>                   | 26.3          | 12.5          | 5.4          | 33.4          | 3.5          | 4.6           | 8.4           | 1.4           | 1.8           | .             | .               | 66.4                     |  |
|                                | (25.3 - 27.3) | (11.6 - 13.4) | (4.7 - 6.1)  | (31.4 - 35.4) | (2.6 - 4.4)  | (3.6 - 5.6)   | (6.2 - 10.6)  | (0.7 - 2.1)   | (1.5 - 2.1)   | .             | .               | (64.5 - 68.3)            |  |
| <b>45-54</b>                   | 25.6          | 11.5          | 4.3          | 26.2          | 3.3          | 7.1           | 17.9          | 2.2           | 1.2           | .             | .               | 66.5                     |  |
|                                | (24.5 - 26.7) | (10.6 - 12.4) | (3.7 - 4.9)  | (24.7 - 27.7) | (2.4 - 4.2)  | (5.5 - 8.7)   | (14.5 - 21.3) | (1.2 - 3.2)   | (0.7 - 1.7)   | .             | .               | (64.7 - 68.3)            |  |
| <b>55-64</b>                   | 26.8          | 13.0          | 7.7          | 40.1          | 7.7          | 14.4          | 41.2          | 10.0          | 6.8           | 2.7           | 0.3             | 84.6                     |  |
|                                | (25.4 - 28.2) | (11.6 - 14.4) | (5.4 - 10.0) | (36.7 - 43.5) | (5.8 - 9.6)  | (11.8 - 17.0) | (35.9 - 46.5) | (7.1 - 12.9)  | (4.9 - 8.7)   | (1.7 - 3.7)   | (0.1 - 0.5)     | (81.8 - 87.4)            |  |
| <b>65-74</b>                   | 27.4          | 11.3          | 4.3          | 42.4          | 10.9         | 25.0          | 52.8          | 15.5          | 10.6          | 7.8           | 0.7             | 90.2                     |  |
|                                | (24.7 - 30.1) | (9.6 - 13.0)  | (2.8 - 5.8)  | (37.4 - 47.4) | (6.6 - 15.2) | (19.3 - 30.7) | (47.8 - 57.8) | (11.4 - 19.6) | (6.9 - 14.3)  | (6.3 - 9.3)   | (0.3 - 1.1)     | (88.0 - 92.4)            |  |
| <b>75-84</b>                   | 18.4          | 5.0           | 1.4          | 43.7          | 10.3         | 35.1          | 53.4          | 17.6          | 15.5          | 27.9          | 4.6             | 93.5                     |  |
|                                | (13.5 - 23.3) | (2.7 - 7.3)   | (0.4 - 2.4)  | (34.7 - 52.7) | (6.8 - 13.8) | (28.8 - 41.4) | (42.9 - 63.9) | (12.1 - 23.1) | (10.8 - 20.2) | (24.5 - 31.3) | (2.7 - 6.5)     | (91.1 - 95.9)            |  |
| <b>85+</b>                     | 10.8          | 2.4           | 0.3          | 41.0          | 10.9         | 35.2          | 40.2          | 19.7          | 22.4          | 62.9          | 21.4            | 93.4                     |  |
|                                | (6.8 - 14.8)  | (1.1 - 3.7)   | (0.1 - 0.5)  | (32.8 - 49.2) | (7.3 - 14.5) | (27.5 - 42.9) | (29.4 - 51.0) | (13.5 - 25.9) | (15.6 - 29.2) | (56.8 - 69.0) | (17.0 - 25.8)   | (89.7 - 97.1)            |  |

This figure reports the prevalence of different risk factors in the US adult Hispanic population ages 25+ as of July 1, 2020. The estimates are produced by the Future Adult Model and the Future Elderly Model. The category “any positive risk factor” includes individuals who have at least one of the risk factors listed in the figure. 95% uncertainty intervals are given in parentheses. BMI: body mass index.

**Supplement Figure 4. White population: prevalence of risk factors in 2020 that are positively associated with COVID-19 mortality**

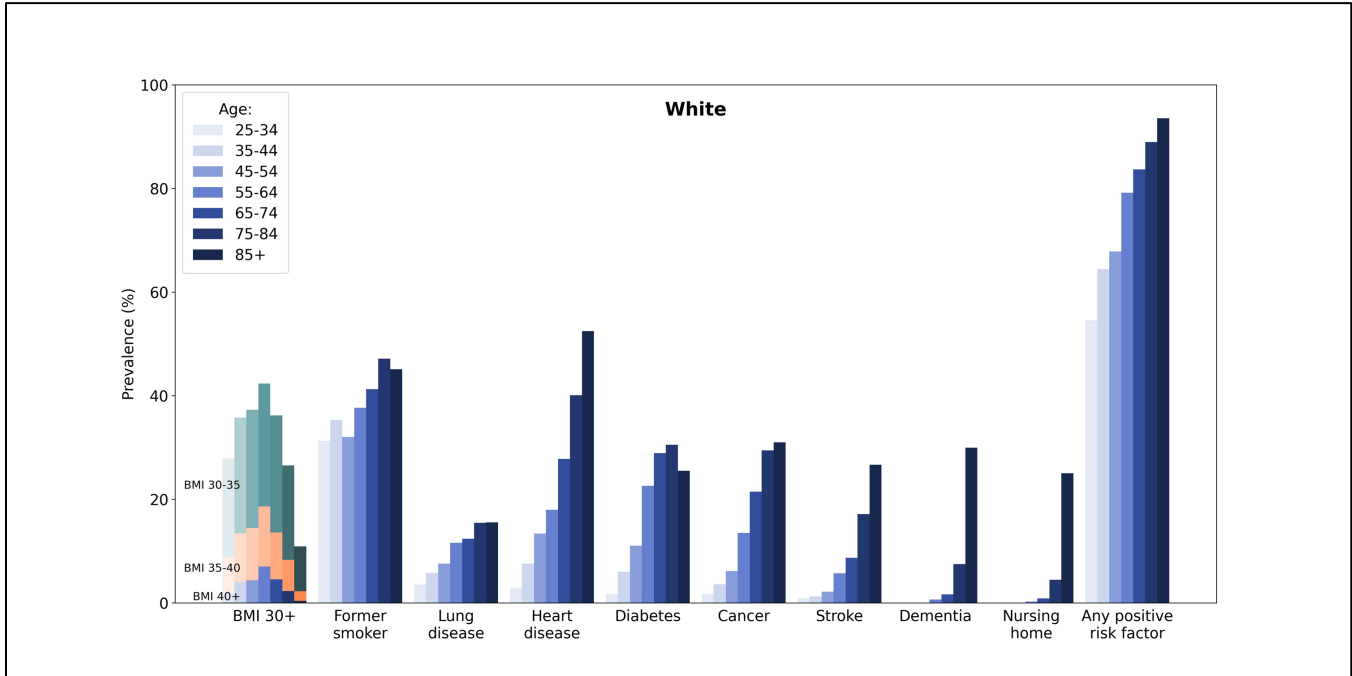

| Prevalence in 2020, % (95% CI) |               |               |             |               |               |               |               |               |               |               |                 |                          |  |
|--------------------------------|---------------|---------------|-------------|---------------|---------------|---------------|---------------|---------------|---------------|---------------|-----------------|--------------------------|--|
| Age (years)                    | BMI 30-35     | BMI 35-40     | BMI 40+     | Former smoker | Lung disease  | Heart disease | Diabetes      | Cancer        | Stroke        | Dementia      | In nursing home | Any positive risk factor |  |
| <b>25-34</b>                   | 19.1          | 6.9           | 1.9         | 31.3          | 3.6           | 2.9           | 1.7           | 1.8           | 0.9           | .             | .               | 54.5                     |  |
|                                | (18.8 - 19.4) | (6.7 - 7.1)   | (1.7 - 2.1) | (30.2 - 32.4) | (3.3 - 3.9)   | (2.6 - 3.2)   | (1.5 - 1.9)   | (1.5 - 2.1)   | (0.8 - 1.0)   | .             | .               | (53.8 - 55.2)            |  |
| <b>35-44</b>                   | 22.3          | 9.4           | 4.1         | 35.3          | 5.7           | 7.6           | 6.0           | 3.6           | 1.3           | .             | .               | 64.4                     |  |
|                                | (21.9 - 22.7) | (9.1 - 9.7)   | (3.7 - 4.5) | (34.2 - 36.4) | (5.1 - 6.3)   | (7.1 - 8.1)   | (5.5 - 6.5)   | (3.0 - 4.2)   | (1.1 - 1.5)   | .             | .               | (63.8 - 65.0)            |  |
| <b>45-54</b>                   | 22.8          | 10.1          | 4.4         | 32.0          | 7.6           | 13.4          | 11.0          | 6.1           | 2.2           | .             | .               | 67.8                     |  |
|                                | (22.3 - 23.3) | (9.8 - 10.4)  | (4.0 - 4.8) | (31.2 - 32.8) | (6.8 - 8.4)   | (12.5 - 14.3) | (10.3 - 11.7) | (5.3 - 6.9)   | (1.9 - 2.5)   | .             | .               | (67.1 - 68.5)            |  |
| <b>55-64</b>                   | 23.7          | 11.6          | 7.0         | 37.7          | 11.6          | 18.0          | 22.6          | 13.5          | 5.7           | 0.7           | 0.3             | 79.2                     |  |
|                                | (22.9 - 24.5) | (10.8 - 12.4) | (6.1 - 7.9) | (35.1 - 40.3) | (10.2 - 13.0) | (16.7 - 19.3) | (20.9 - 24.3) | (11.8 - 15.2) | (4.8 - 6.6)   | (0.3 - 1.1)   | (0.2 - 0.4)     | (77.3 - 81.1)            |  |
| <b>65-74</b>                   | 22.6          | 9.0           | 4.6         | 41.3          | 12.4          | 27.8          | 28.9          | 21.5          | 8.7           | 1.6           | 0.9             | 83.7                     |  |
|                                | (21.5 - 23.7) | (8.3 - 9.7)   | (3.8 - 5.4) | (38.8 - 43.8) | (11.2 - 13.6) | (26.0 - 29.6) | (27.0 - 30.8) | (20.2 - 22.8) | (7.8 - 9.6)   | (1.4 - 1.8)   | (0.7 - 1.1)     | (82.4 - 85.0)            |  |
| <b>75-84</b>                   | 18.2          | 6.0           | 2.3         | 47.2          | 15.5          | 40.1          | 30.5          | 29.4          | 17.1          | 7.5           | 4.5             | 88.9                     |  |
|                                | (17.3 - 19.1) | (5.5 - 6.5)   | (1.7 - 2.9) | (44.3 - 50.1) | (14.4 - 16.6) | (37.9 - 42.3) | (28.7 - 32.3) | (27.6 - 31.2) | (15.3 - 18.9) | (6.9 - 8.1)   | (4.1 - 4.9)     | (87.7 - 90.1)            |  |
| <b>85+</b>                     | 8.6           | 1.9           | 0.4         | 45.1          | 15.6          | 52.5          | 25.5          | 31.0          | 26.6          | 30.0          | 25.0            | 93.6                     |  |
|                                | (7.7 - 9.5)   | (1.5 - 2.3)   | (0.2 - 0.6) | (41.3 - 48.9) | (13.9 - 17.3) | (49.4 - 55.6) | (23.1 - 27.9) | (28.5 - 33.5) | (24.8 - 28.4) | (28.2 - 31.8) | (23.2 - 26.8)   | (92.3 - 94.9)            |  |

This figure reports the prevalence of different risk factors in the US adult White population ages 25+ as of July 1, 2020. The estimates are produced by the Future Adult Model and the Future Elderly Model. The category “any positive risk factor” includes individuals who have at least one of the risk factors listed in the figure. 95% uncertainty intervals are given in parentheses. BMI: body mass index.

**Supplement Figure 5. Predicted years of life lost due to the US COVID-19 pandemic, relative to average life expectancy in the decedent’s age-sex-race/ethnicity subgroup, by age group, sex, and race/ethnicity**

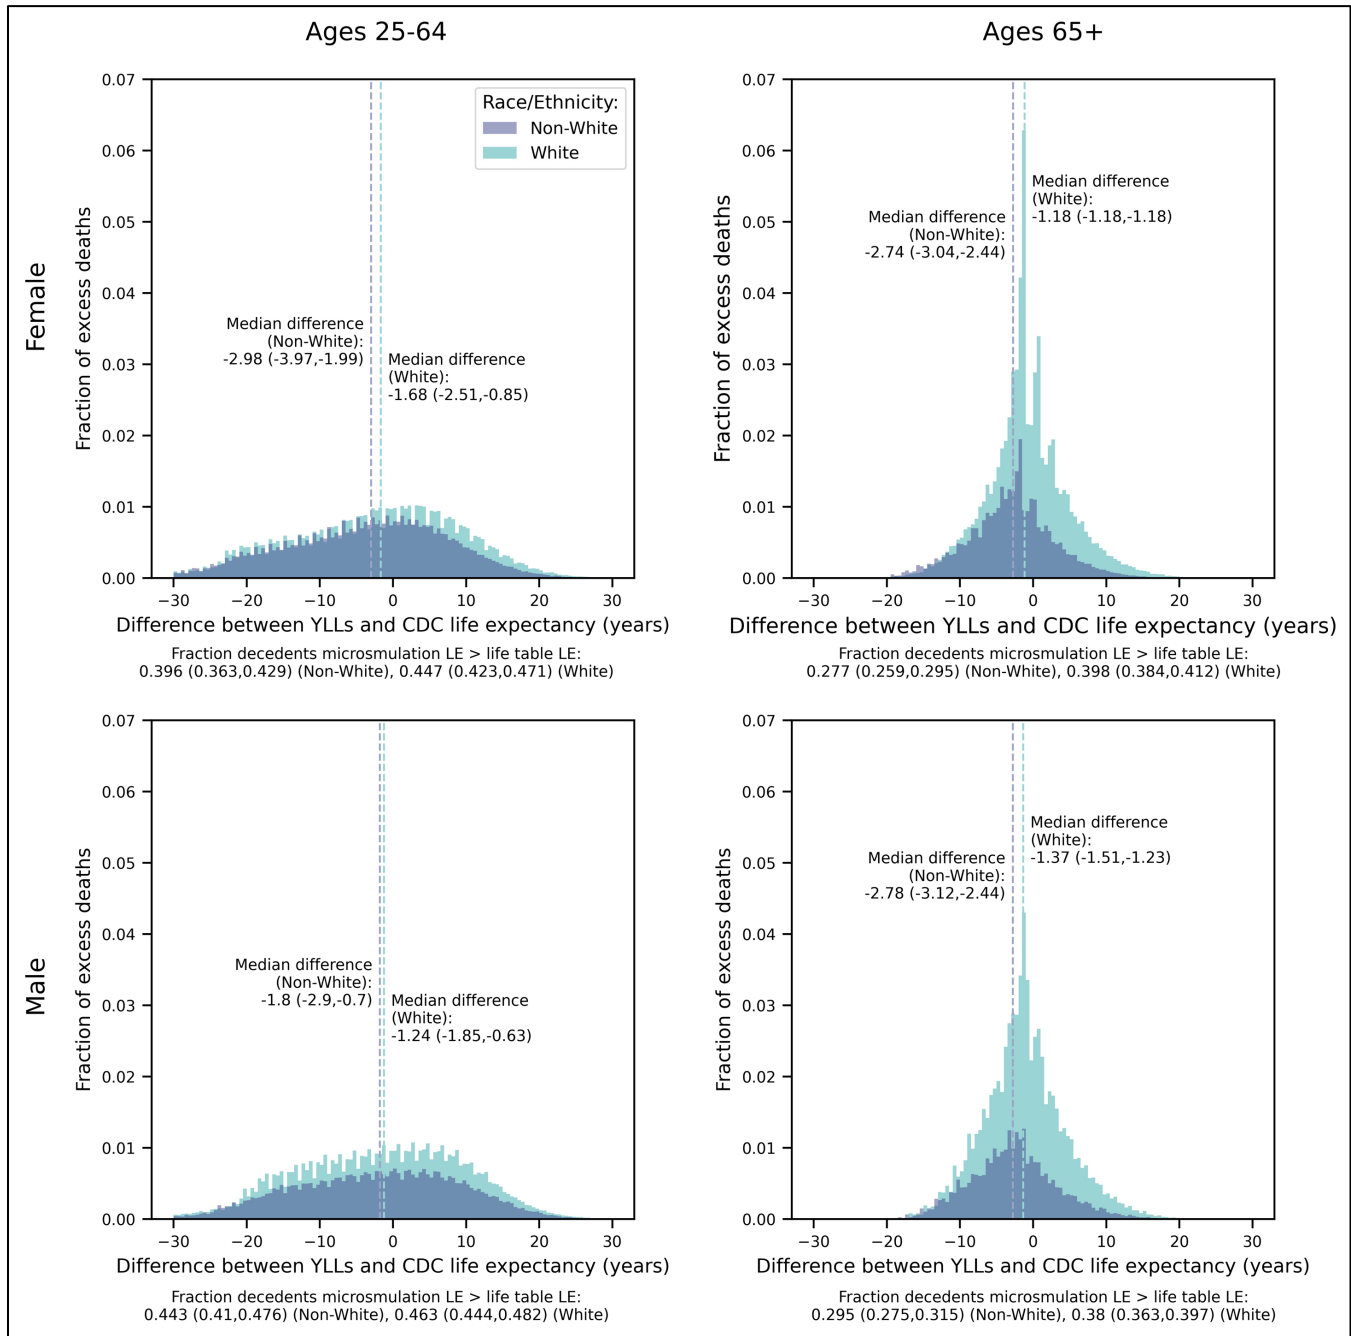

This figure reports the distribution of the number of years of life lost (YLLs) due the US COVID-19 pandemic, relative to the decedent’s age-, sex-, and race/ethnicity-adjusted life expectancy as reported in the 2018 period life table from the Centers for Disease Control and Prevention (CDC). An x-axis value of 0 indicates that the decedent’s YLLs, which are estimated by microsimulation under the Individualized Risk analysis assumptions, are equal to the average CDC life expectancy in their age-sex-race/ethnicity subgroup. Values greater than zero correspond to decedents with YLLs above the average CDC life expectancy for their subgroup, while values less than zero correspond to individuals with YLLs below the average CDC life expectancy. The dashed vertical lines report medians of the distributions. 95% uncertainty intervals are given in parentheses. LE: life expectancy.

### Supplement Figure 6. Average Risk analysis: number of quality-adjusted life-years lost per 10,000, by age group and comorbidity

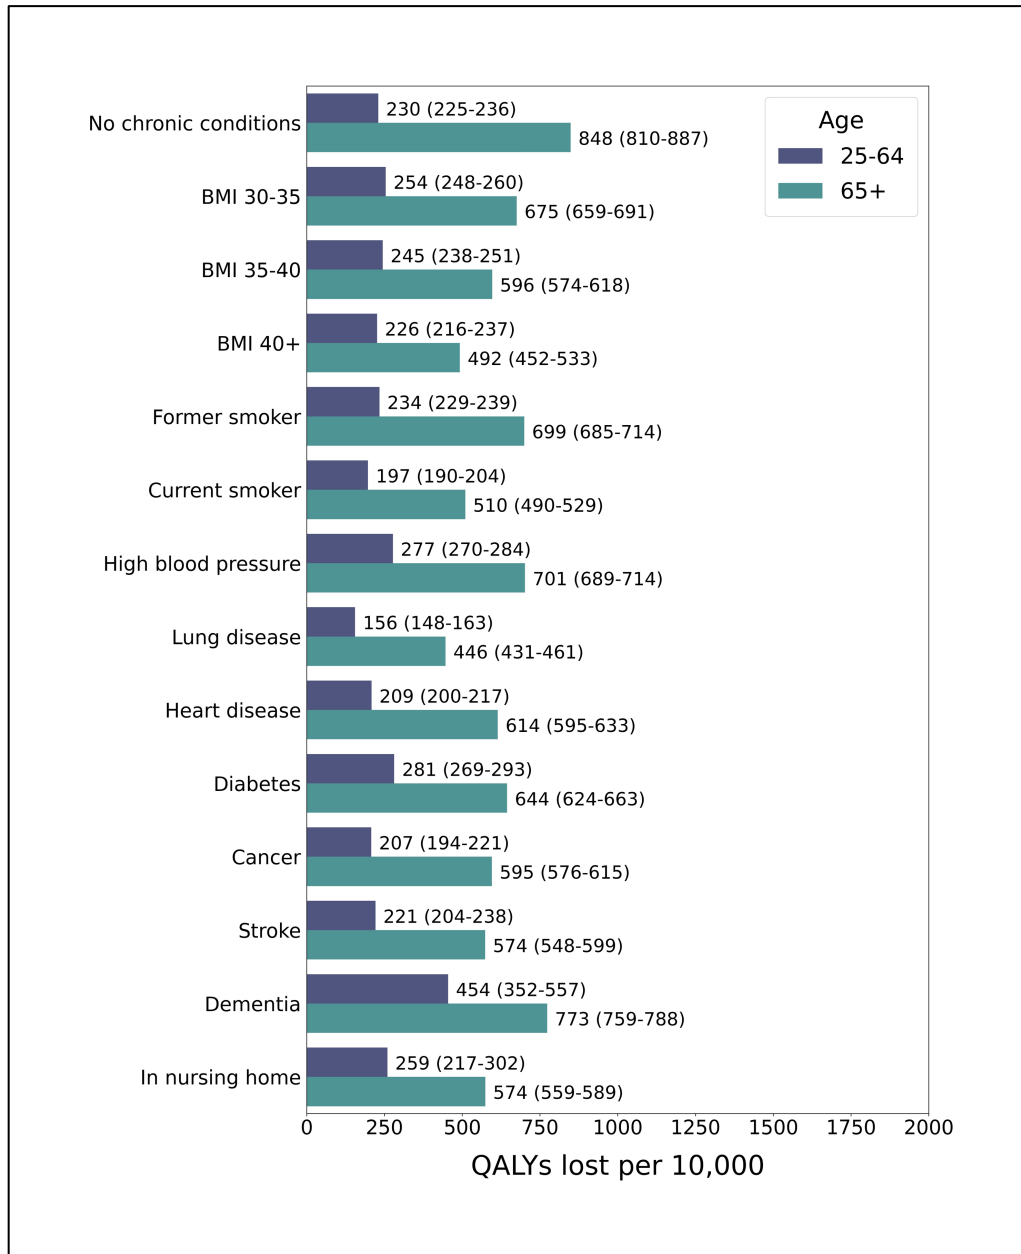

This figure reports the number of quality-adjusted life-years (QALYs) lost from the COVID-19 pandemic among US adults ages 25-64 and ages 65+, by comorbidity, over the time period March 22, 2020 through March 13, 2021. 95% uncertainty intervals are given in parentheses. The estimates are produced by the microsimulation model's Average Risk analysis, which assumes that each excess death occurred randomly within the 5-year age, sex, and race/ethnicity category that corresponds to that death. Estimates for dementia and living in a nursing home pertain only to ages 55+. Non-COVID-19-related excess deaths are assumed to occur based on the (pre-COVID-19) mortality probabilities projected by the microsimulation. BMI: Body Mass Index.

**Supplement Figure 7. Frailty-Based Risk analysis: number of quality-adjusted life-years lost per 10,000, by age group and comorbidity**

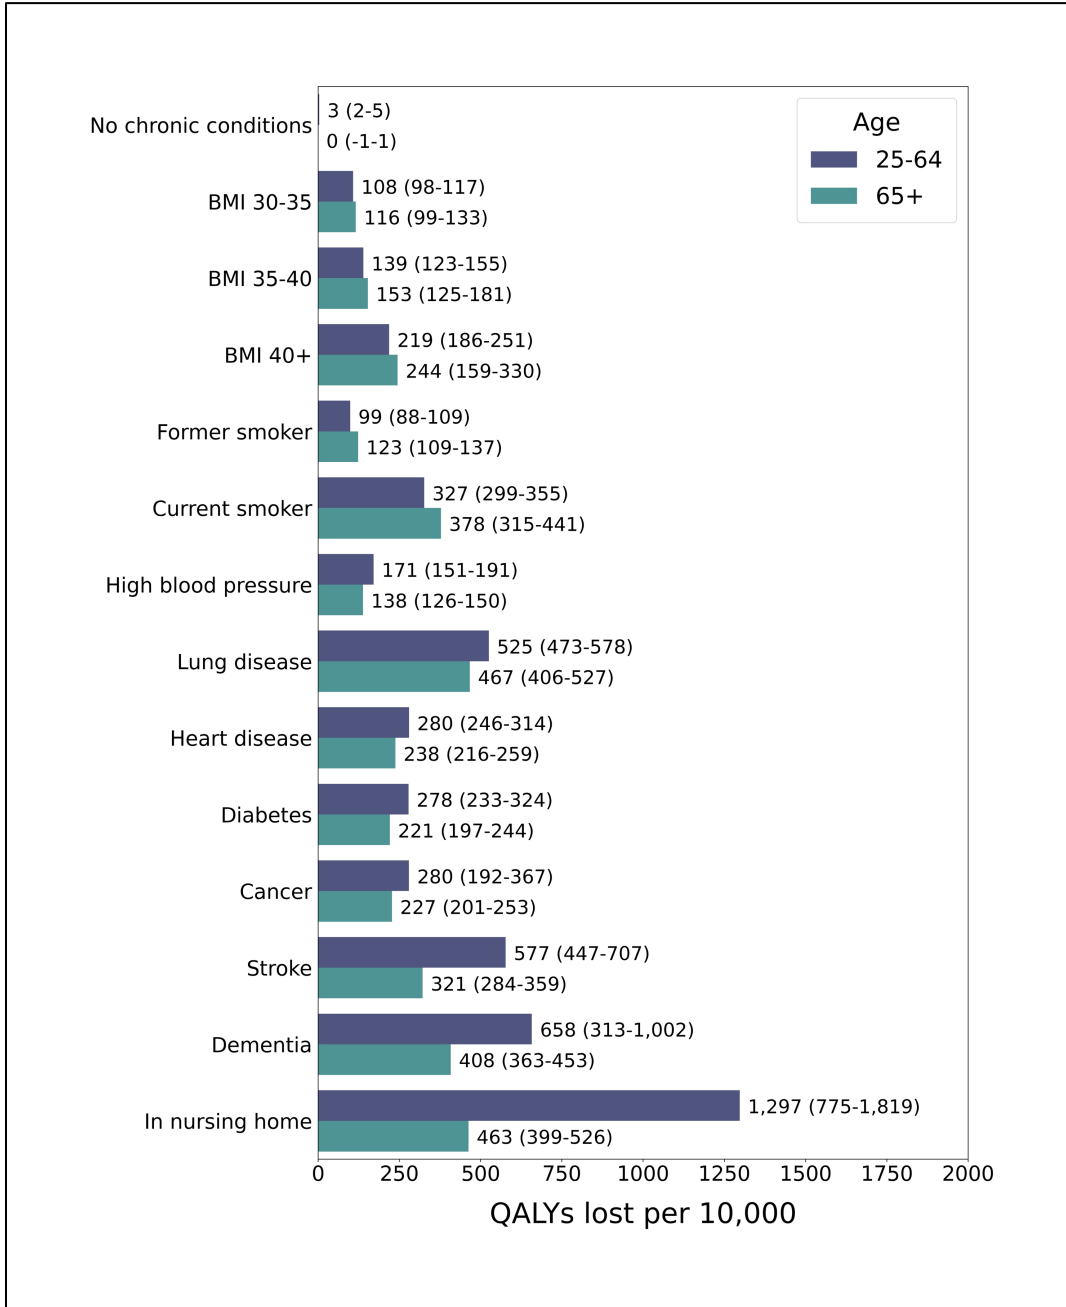

This figure reports the number of quality-adjusted life-years (QALYs) lost from the COVID-19 pandemic among US adults ages 25-64 and ages 65+, by comorbidity, over the time period March 22, 2020 through March 13, 2021. 95% uncertainty intervals are given in parentheses. The estimates are produced by the microsimulation model's Frailty-Based Risk analysis, which assigns all excess deaths within the subgroup to the individuals with the highest annual mortality hazard projected by the microsimulation. Estimates for dementia and living in a nursing home pertain only to ages 55+. Non-COVID-19-related excess deaths are assumed to occur based on the (pre-COVID-19) mortality probabilities projected by the microsimulation. BMI: Body Mass Index.

**Supplement Figure 8. Number of quality-adjusted life-years lost per 10,000, by age group, sex, and race/ethnicity**

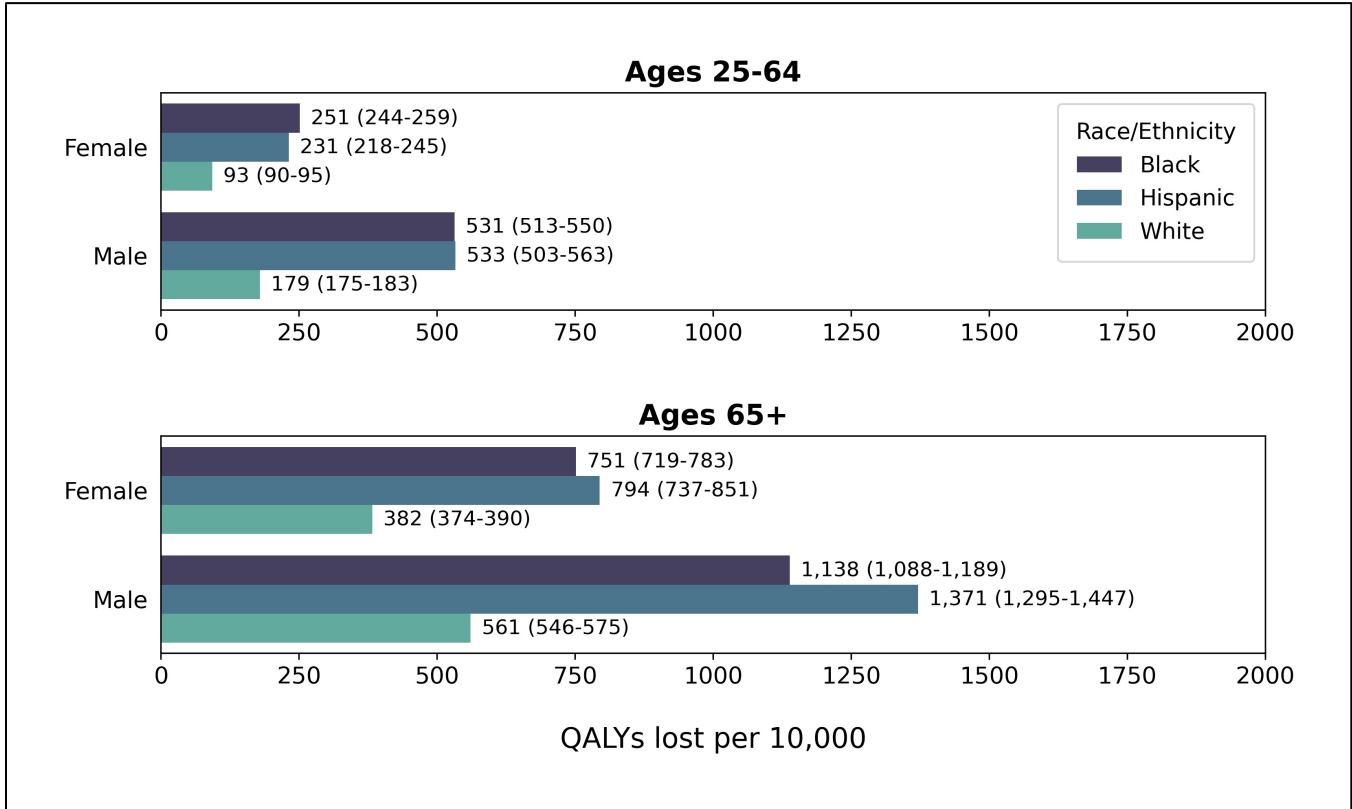

This figure reports the number of quality-adjusted life-years (QALYs) lost per 10,000 among US populations ages 25-64 and 65+, by race/ethnicity and sex, over the time period March 22, 2020 through March 13, 2021 as a result of the COVID-19 pandemic. 95% uncertainty intervals are given in parentheses. The estimates are produced by the microsimulation model’s Individualized Risk analysis, which assigns all COVID-19-related excess deaths within the age-sex-race/ethnicity subgroup in proportion to estimates of COVID-19 comorbidity mortality odds ratios, and assigns non-COVID-19-related deaths in proportion to the 2020 (pre-COVID-19) annual mortality hazard projected by the microsimulation.



**Supplement Figure 9. Average Risk analysis: number of quality-adjusted life-years lost per 10,000, by race/ethnicity and comorbidity**

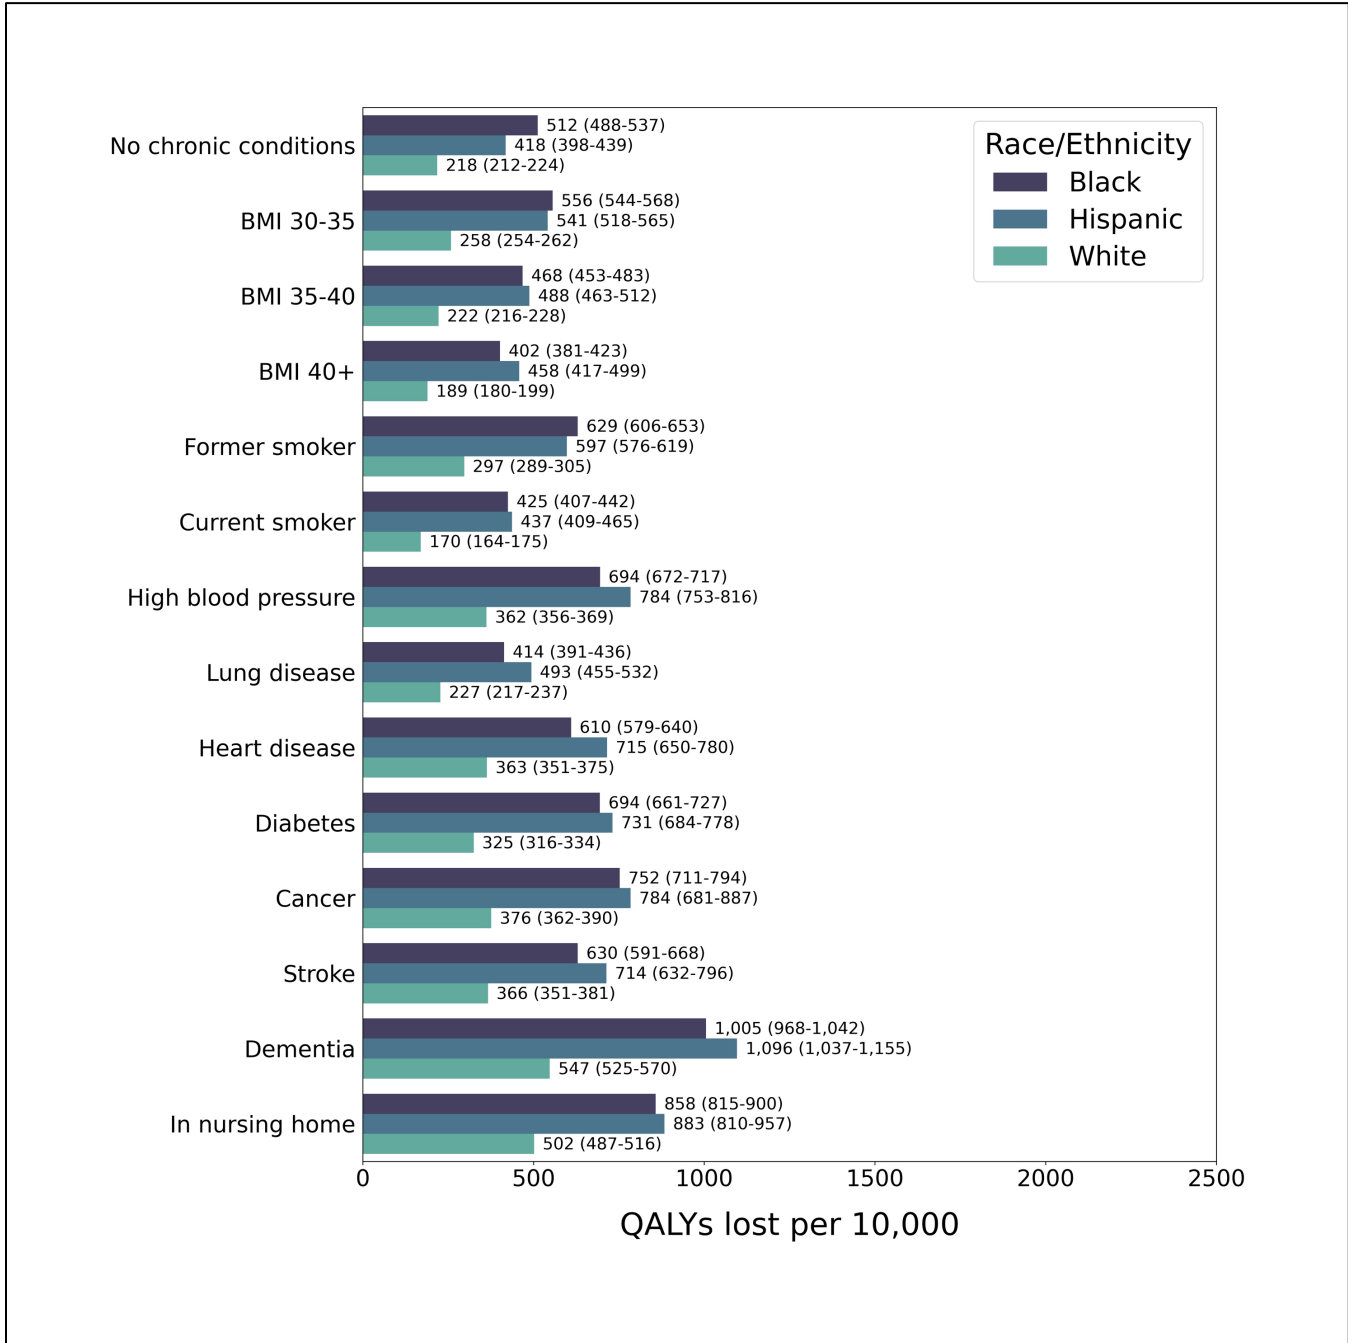

This figure reports the number of quality-adjusted life-years (QALYs) lost from the COVID-19 pandemic among US adults ages 25-64 and ages 65+, by comorbidity and race/ethnicity, over the time period March 22, 2020 through March 13, 2021. 95% uncertainty intervals are given in parentheses. The estimates are produced by the microsimulation model’s Average Risk analysis, which assumes that each excess death occurred randomly within the 5-year age, sex, and race/ethnicity category that corresponds to that death. Estimates for dementia and living in a nursing home pertain only to ages 55+. Non-COVID-19-related excess deaths are assumed to occur based on the (pre-COVID-19) mortality probabilities projected by the microsimulation. BMI: Body Mass Index.

**Supplement Figure 10. Frailty-Based Risk analysis: number of quality-adjusted life-years lost per 10,000, by race/ethnicity and comorbidity**

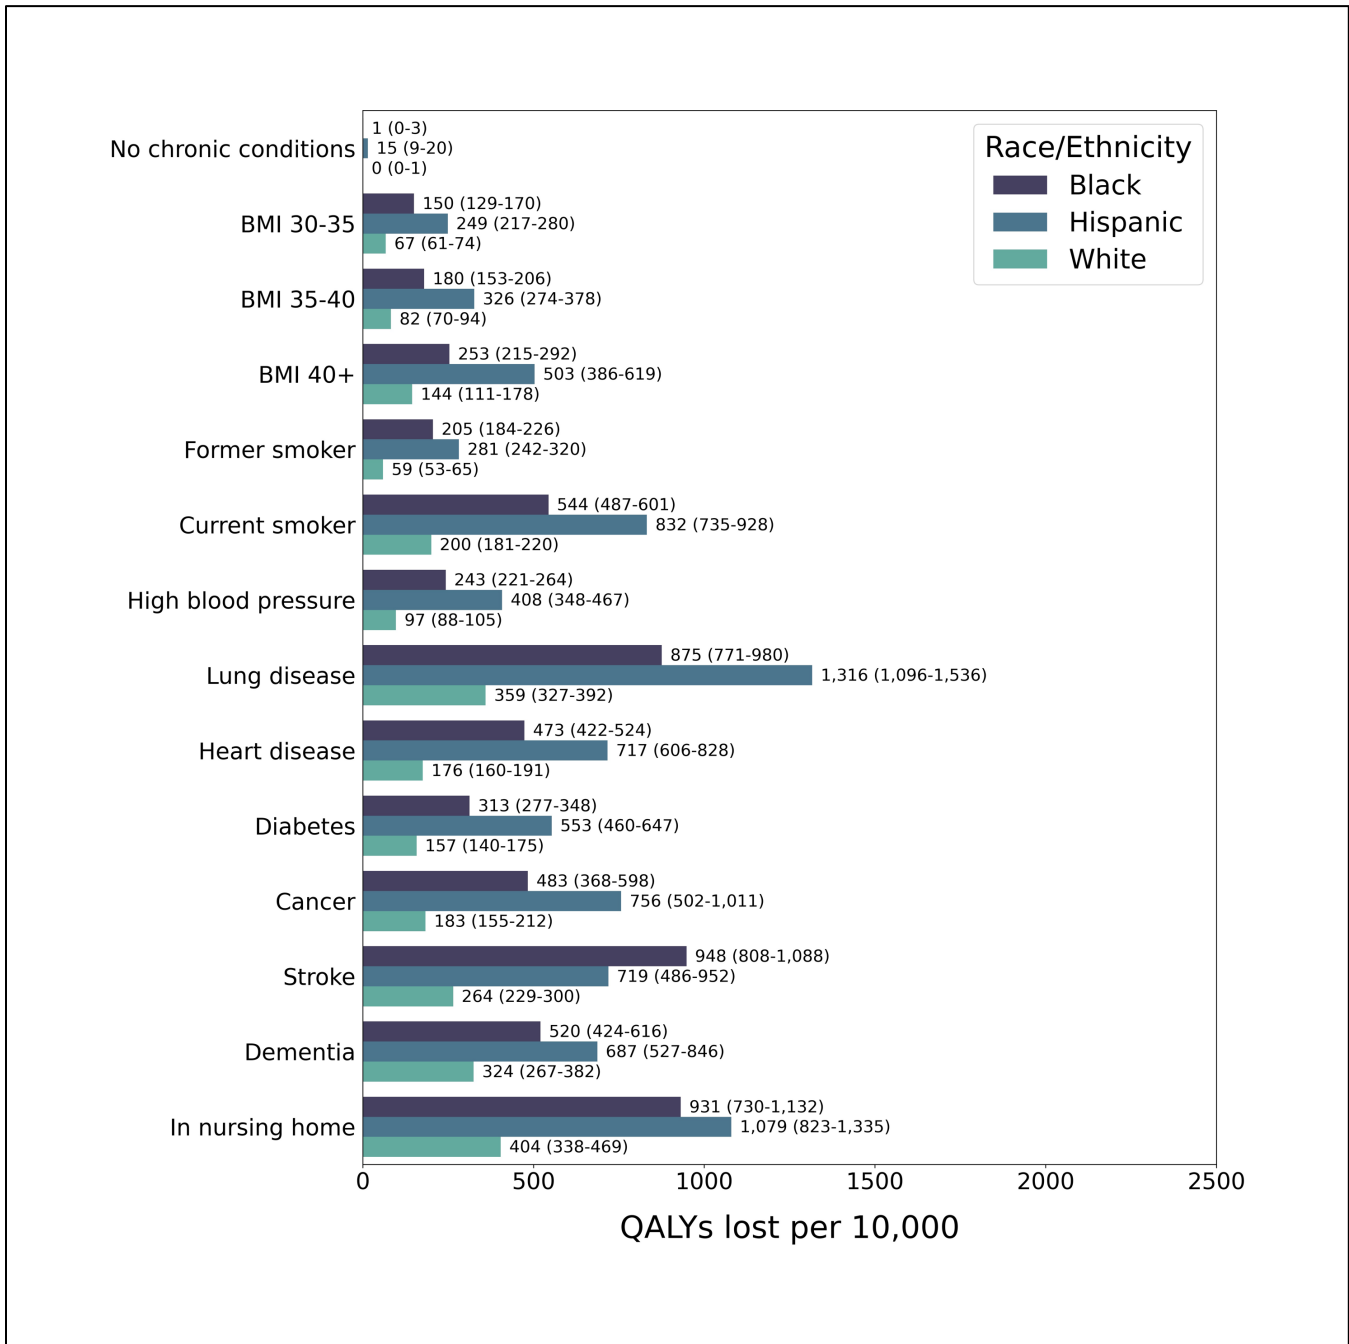

This figure reports the number of quality-adjusted life-years (QALYs) lost from the COVID-19 pandemic among US adults ages 25-64 and ages 65+, by comorbidity and race/ethnicity, over the time period March 22, 2020 through March 13, 2021. 95% uncertainty intervals are given in parentheses. The estimates are produced by the microsimulation model's Frailty-Based Risk analysis, which assigns all excess deaths within the subgroup to the individuals with the highest annual mortality hazard projected by the microsimulation. Estimates for dementia and living in a nursing home pertain only to ages 55+. Non-COVID-19-related excess deaths are assumed to occur based on the (pre-COVID-19) mortality probabilities projected by the microsimulation. BMI: Body Mass Index.

## References

1. Williamson EJ, Walker AJ, Bhaskaran K, Bacon S, Bates C, Morton CE, et al. Factors associated with COVID-19-related death using OpenSAFELY. *Nature*. 2020;584(7821):430-6.
2. Bhaskaran K, Bacon SC, Evans SJ, Bates CJ, Rentsch CT, MacKenna B, et al. Factors associated with deaths due to COVID-19 versus other causes: population-based cohort analysis of UK primary care data and linked national death registrations within the OpenSAFELY platform. *The Lancet Regional Health-Europe*. 2021;6:100109.
3. US Census Projections. Census Bureau. National population projections: Downloadable files: Table 1. Projected population by single year of age, sex, race, and Hispanic origin for the United States, 2012 to 2060: Middle series.; 2012.
4. Shaw JW, Johnson JA, Coons SJ. US valuation of the EQ-5D health states: development and testing of the D1 valuation model. *Medical Care*. 2005:203-20.
5. Blaylock B. *Essays on the Use of Microsimulation for Health and Economic Policy Analysis*: University of Southern California; 2015.
6. Zissimopoulos J, Crimmins E, Clair PS. The value of delaying Alzheimer's disease onset. *Forum for Health Economics & Policy*, 2015. De Gruyter: 25-39.
7. CMS. Division of Nursing Homes/Quality, Safety, and Oversight Group/Center for Clinical Standards and Quality; 2021.

# The Future Adult Model: Technical Documentation

Dana P. Goldman, University of Southern California  
Duncan Ermini Leaf, University of Southern California  
Bryan Tysinger, University of Southern California

September 8, 2021

# Contents

|           |                                                                               |           |
|-----------|-------------------------------------------------------------------------------|-----------|
| <b>1</b>  | <b>Functioning of the dynamic model</b>                                       | <b>4</b>  |
| 1.1       | Background . . . . .                                                          | 4         |
| 1.2       | Overview . . . . .                                                            | 4         |
| 1.3       | Comparison with other microsimulation models of health expenditures . . . . . | 5         |
| 1.3.1     | CBOLT Model . . . . .                                                         | 6         |
| 1.3.2     | Centers for Medicare and Medicaid Services . . . . .                          | 6         |
| 1.3.3     | MINT Model . . . . .                                                          | 6         |
| <b>2</b>  | <b>Data sources used for estimation</b>                                       | <b>6</b>  |
| 2.1       | Panel Survey of Income Dynamics . . . . .                                     | 6         |
| 2.2       | Health and Retirement Study . . . . .                                         | 7         |
| 2.3       | Medical Expenditure Panel Survey . . . . .                                    | 7         |
| 2.4       | Medicare Current Beneficiary Survey . . . . .                                 | 7         |
| <b>3</b>  | <b>Estimation</b>                                                             | <b>8</b>  |
| 3.1       | Transition model . . . . .                                                    | 8         |
| 3.1.1     | Further Details on Specific Transition Models . . . . .                       | 9         |
| 3.1.2     | Inverse Hyperbolic Sine Transformation . . . . .                              | 10        |
| <b>4</b>  | <b>Model for replenishing cohorts</b>                                         | <b>11</b> |
| 4.1       | Model and estimation . . . . .                                                | 11        |
| 4.2       | Trends for replenishing cohorts . . . . .                                     | 12        |
| <b>5</b>  | <b>Government revenues and expenditures</b>                                   | <b>12</b> |
| 5.1       | Medical costs estimation . . . . .                                            | 12        |
| <b>6</b>  | <b>Implementation</b>                                                         | <b>13</b> |
| 6.1       | Intervention Module . . . . .                                                 | 14        |
| <b>7</b>  | <b>Validation</b>                                                             | <b>14</b> |
| 7.1       | Data Splitting . . . . .                                                      | 15        |
| 7.1.1     | Demographics . . . . .                                                        | 15        |
| 7.1.2     | Health Outcomes . . . . .                                                     | 15        |
| 7.1.3     | Health Risk Factors . . . . .                                                 | 15        |
| 7.1.4     | Economic Outcomes . . . . .                                                   | 15        |
| 7.2       | External Corroboration . . . . .                                              | 15        |
| <b>8</b>  | <b>Baseline Forecasts</b>                                                     | <b>16</b> |
| 8.1       | Disease Prevalence . . . . .                                                  | 16        |
| <b>9</b>  | <b>Acknowledgments</b>                                                        | <b>16</b> |
| <b>10</b> | <b>Tables</b>                                                                 | <b>16</b> |
|           | <b>References</b>                                                             | <b>33</b> |

## List of Figures

|   |                                                                            |    |
|---|----------------------------------------------------------------------------|----|
| 1 | Architecture of the FAM . . . . .                                          | 5  |
| 2 | Historic and Forecasted Chronic Disease Prevalence for Men 25+ . . . . .   | 29 |
| 3 | Historic and Forecasted Chronic Disease Prevalence for Women 25+ . . . . . | 29 |
| 4 | Historic and Forecasted ADL and IADL Prevalence for Men 25+ . . . . .      | 30 |
| 5 | Historic and Forecasted ADL and IADL Prevalence for Women 25+ . . . . .    | 30 |

## List of Tables

|    |                                                                                                      |    |
|----|------------------------------------------------------------------------------------------------------|----|
| 1  | Estimated outcomes in replenishing cohorts module . . . . .                                          | 16 |
| 2  | Estimated outcomes in transitions module . . . . .                                                   | 17 |
| 3  | Health condition prevalences in survey data . . . . .                                                | 18 |
| 4  | Survey questions used to determine health conditions . . . . .                                       | 19 |
| 5  | Outcomes in the transition model . . . . .                                                           | 20 |
| 6  | Restrictions on transition model . . . . .                                                           | 21 |
| 7  | Descriptive statistics for stock population . . . . .                                                | 22 |
| 8  | Parameter estimates for latent model: conditional means and thresholds . . . . .                     | 23 |
| 9  | Parameter estimates for latent model: parameterized covariance matrix . . . . .                      | 24 |
| 10 | Health and risk factor trends for replenishing cohorts, prevalences relative to 2009 . . . . .       | 25 |
| 11 | Education trends for replenishing cohorts, prevalences relative to 2009 . . . . .                    | 26 |
| 12 | Social trends for replenishing cohorts, prevalences relative to 2009 . . . . .                       | 27 |
| 13 | Data-splitting validation of 1999 cohort: Mortality in 2001, 2007, and 2013 . . . . .                | 28 |
| 14 | Data-splitting validation of 1999 cohort: Demographic outcomes in 2001, 2007, and 2013 . . . . .     | 28 |
| 15 | Data-splitting validation of 1999 cohort: Binary health outcomes in 2001, 2007, and 2013 . . . . .   | 28 |
| 16 | Data-splitting validation of 1999 cohort: Risk factor outcomes in 2001, 2007, and 2013 . . . . .     | 31 |
| 17 | Data-splitting validation of 1999 cohort: Binary economic outcomes in 2001, 2007, and 2013 . . . . . | 31 |
| 18 | Population forecasts: Census compared to FAM . . . . .                                               | 32 |

This appendix describes technical details to support the paper **”Measuring the COVID-19 Mortality Burden in the United States: A Microsimulation Study”**. In addition to outcomes described in the paper, the microsimulation provides additional outcomes (e.g. medical expenditures and social security benefits). As the data sources and models are intricately connected, we report all data sources and methodology to provide a complete picture of the microsimulation to the reader. However, the sections that are most relevant to this paper are: section 1 for an overview; data source sections 2.1 (PSID), 2.2 (HRS), and 2.3 (MEPS); sections 3 and 4 for estimation of the transition model and the model for new cohorts, respectively; section 6 for the implementation; section 7 for validation strategies; and section 8 for baseline forecasts.

# 1 Functioning of the dynamic model

## 1.1 Background

The Future Elderly Model (FEM) is a microsimulation model originally developed out of an effort to examine health and health care costs among the elderly Medicare population (age 65+). A description of the previous incarnation of the model can be found in Goldman et al. (2004). The original work was funded by the Centers for Medicare and Medicaid Services and carried out by a team of researchers composed of Dana P. Goldman, Paul G. Shekelle, Jayanta Bhattacharya, Michael Hurd, Geoffrey F. Joyce, Darius N. Lakdawalla, Dawn H. Matsui, Sydne J. Newberry, Constantijn W. A. Panis and Baoping Shang.

Since then various extensions have been implemented to the original model. The most recent version of the FEM now projects health outcomes for all Americans aged 51 and older and uses the Health and Retirement Study (HRS) as a host dataset rather than the Medicare Current Beneficiary Survey (MCBS). The work has also been extended to include economic outcomes such as earnings, labor force participation and pensions. This work was funded by the National Institute on Aging through its support of the RAND Roybal Center for Health Policy Simulation (P30AG024968), the Department of Labor through contract J-9-P-2-0033, the National Institutes of Aging through the R01 grant “Integrated Retirement Modeling” (R01AG030824) and the MacArthur Foundation Research Network on an Aging Society.

This document describes the Future Adult Model (FAM), the development of the model to forecast Americans aged 25 and older. FAM uses the Panel Survey of Income Dynamics (PSID) as the host dataset. In addition to modeling health, health care costs, and economic outcomes, FAM also models life events such as changes in marital status and childbearing. Development of FAM is supported by the National Institutes of Aging through the USC Roybal Center for Health Policy Simulation (5P30AG024968-13) and the MacArthur Foundation Research Network on an Aging Society.

## 1.2 Overview

The defining characteristic of the model is the modeling of real rather than synthetic cohorts, all of whom are followed at the individual level. This allows for more heterogeneity in behavior than would be allowed by a cell-based approach. Also, since the PSID interviews both respondent and spouse, we can link records to calculate household-level outcomes, which depend on the responses of both spouses.

The model has three core components:

- The replenishing cohort module predicts the economic and health outcomes of new cohorts of 25/26 year-olds. This module takes in data from the Panel Survey of Income Dynamics (PSID) and trends calculated from other sources. It allows us to generate cohorts as the simulation proceeds, so that we can measure outcomes for the age 25+ population in any given year.
- The transition module calculates the probabilities of transiting across various health states and financial outcomes. The module takes as inputs risk factors such as smoking, weight, age and education, along with lagged health and financial states. This allows for a great deal of heterogeneity and fairly general feedback effects. The transition probabilities are estimated from the longitudinal data in the PSID.

- The policy outcomes module aggregates projections of individual-level outcomes into policy outcomes such as taxes, medical care costs, and disability benefits. This component takes account of public and private program rules to the extent allowed by the available outcomes.

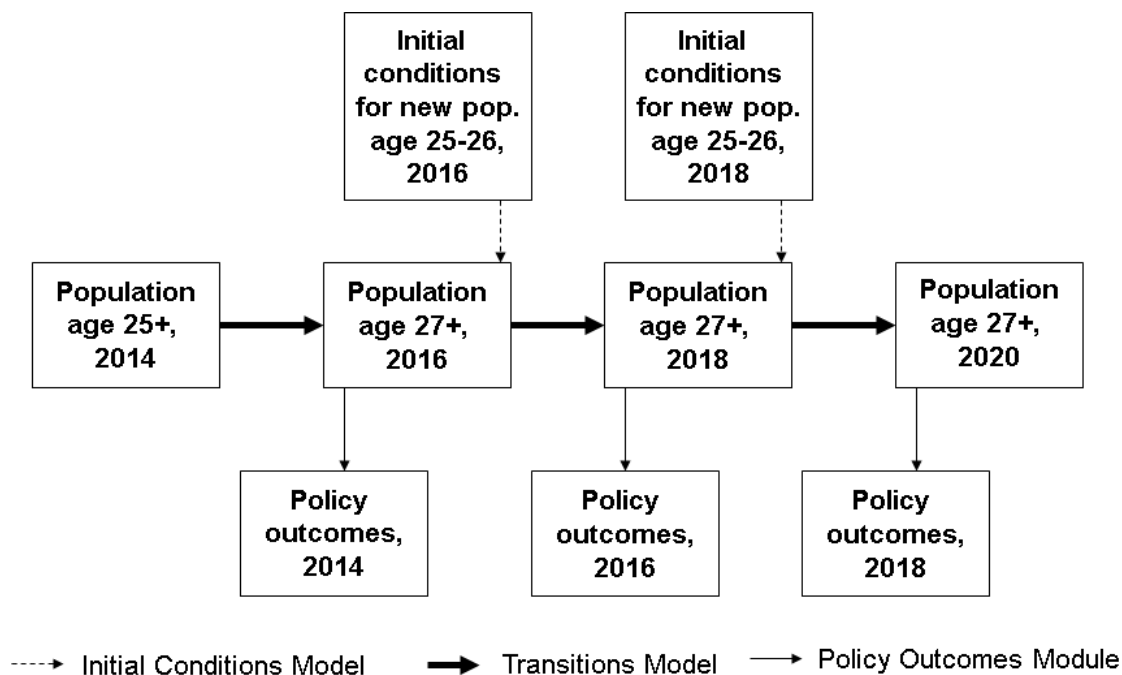

Figure 1: Architecture of the FAM

Figure 1 provides a schematic overview of the model. In this example, we start in 2014 with an initial population aged 25+ taken from the PSID. We then predict outcomes using our estimated transition probabilities (see section 3.1). Those who survive make it to the end of that year, at which point we calculate policy outcomes for the year. We then move to the following time period (two years later), when a replenishing cohort of 25 and 26 year-olds enters (see section 4). This entrance forms the new age 25+ population, which then proceeds through the transition model as before. This process is repeated until we reach the final year of the simulation.

### 1.3 Comparison with other microsimulation models of health expenditures

The precursor to the FAM, the FEM, was unique among models that make health expenditure projections. It was the only model that projected health trends rather than health expenditures. It was also unique in generating mortality projections based on assumptions about health trends rather than historical time series.

FAM extends FEM to younger ages, adding additional dimensions to the simulation. Events over the life course, such as marital status and childbearing are simulated. Labor force participation is modeled in greater detail, distinguishing between out-of-labor force, unemployed, working part-time, and working full-time.



### 1.3.1 CBOLT Model

The Congressional Budget Office (CBO) uses time-series techniques to project health expenditure growth in the short term and then makes an assumption on long-term growth. They use a long term growth of excess costs of 2.3 percentage points starting in 2020 for Medicare. They then assume a reduction in excess cost growth in Medicare of 1.5% through 2083, leaving a rate of 0.9% in 2083. For non-Medicare spending they assume an annual decline of 4.5%, leading to an excess growth rate in 2083 of 0.1%.

### 1.3.2 Centers for Medicare and Medicaid Services

The Centers for Medicare and Medicaid Services (CMS) performs an extrapolation of medical expenditures over the first ten years, then computes a general equilibrium model for years 25 through 75 and linearly interpolates to identify medical expenditures in years 11 through 24 of their estimation. The core assumption they use is that excess growth of health expenditures will be one percentage point higher per year for years 25-75 (that is if nominal GDP growth is 4%, health care expenditure growth will be 5%).

### 1.3.3 MINT Model

Modeling Income in the Near Term (MINT) is a microsimulation model developed by the Urban Institute and others for the Social Security Administration to enable policy analysis of proposed changes to Social Security benefits and payroll taxes Smith and Favreault (2013). MINT uses the Survey of Income and Program Participation (SIPP) as the base data and simulates a range of outcomes, with a focus on those that will impact Social Security. Recent extensions have included health insurance coverage and out-of-pocket medical expenditures. Health enters MINT via self-reported health status and self-reported work limitations. MINT simulates marital status and fertility.

## 2 Data sources used for estimation

The Panel Survey of Income Dynamics is the main data source for the model. We estimate models for assigning characteristics for the replacement cohorts in Replenishing Conditions Module. These are summarized in Table 1. We estimate transition models for the entire PSID population in the Transition Model Module. Transitioned outcomes are described in Table 2.

### 2.1 Panel Survey of Income Dynamics

The Panel Survey of Income Dynamics (PSID), waves 1999-2013 are used to estimate the transition models. PSID interviews occur every two years. We create a dataset of respondents who have formed their own households, either as single heads of households, cohabitating partners, or married partners. These heads, wives, and "wives" (males are automatically assigned head of household status by the PSID if they are in a couple) respond to the richest set of PSID questions, including the health questions that are critical for our purposes.

We use all respondents age 25 and older. When appropriately weighted, the PSID is representative of U.S. households. We also use the PSID as the host data for full population simulations that begin in 2009. Respondents age 25 and 26 are used as the basis for the synthetic cohorts that

we generate, used for replenishing the sample in population simulations or as the basis of cohort scenarios.

The PSID continually adds new cohorts that are descendents (or new partners/spouses of descendents). Consequently, updating the simulation to include more recent data is straightforward.

## 2.2 Health and Retirement Study

The Health and Retirement Study (HRS), waves 1998-2012 are pooled with the PSID for estimation of mortality and widowhood models. The HRS has a similar structure to the PSID, with interviews occurring every two years. The HRS data is harmonized to the PSID for all relevant variables. We use the dataset created by RAND (RAND HRS, version O) as our basis for the analysis. We use all cohorts in the analysis. When appropriately weighted, the HRS in 2010 is representative of U.S. households where at least one member is at least 51. Compared to the PSID, the HRS includes more older Hispanics and interviews more respondents once they have entered nursing homes.

## 2.3 Medical Expenditure Panel Survey

The Medical Expenditure Panel Survey (MEPS), beginning in 1996, is a set of large-scale surveys of families and individuals, their medical providers (doctors, hospitals, pharmacies, etc.), and employers across the United States. The Household Component (HC) of the MEPS provides data from individual households and their members, which is supplemented by data from their medical providers. The Household Component collects data from a representative sub sample of households drawn from the previous year's National Health Interview Survey (NHIS). Since NHIS does not include the institutionalized population, neither does MEPS: this implies that we can only use the MEPS to estimate medical costs for the non-elderly (25-64) population. Information collected during household interviews include: demographic characteristics, health conditions, health status, use of medical services, sources of medical payments, and body weight and height. Each year the household survey includes approximately 12,000 households or 34,000 individuals. Sample size for those aged 25-64 is about 15,800 in each year. MEPS has comparable measures of social-economic (SES) variables as those in PSID, including age, race/ethnicity, educational level, census region, and marital status. We estimate expenditures and utilization using 2007-2010 data.

See Section 5.1 for a description. FAM also uses MEPS 2001-2003 data for QALY model estimation.

## 2.4 Medicare Current Beneficiary Survey

The Medicare Current Beneficiary Survey (MCBS) is a nationally representative sample of aged, disabled and institutionalized Medicare beneficiaries. The MCBS attempts to interview each respondent twelve times over three years, regardless of whether he or she resides in the community, a facility, or transitions between community and facility settings. The disabled (under 65 years of age) and oldest-old (85 years of age or older) are over-sampled. The first round of interviewing was conducted in 1991. Originally, the survey was a longitudinal sample with periodic supplements and indefinite periods of participation. In 1994, the MCBS switched to a rotating panel design with limited periods of participation. Each fall a new panel is introduced, with a target sample size of 12,000 respondents and each summer a panel is retired. Institutionalized respondents are interviewed by proxy. The MCBS contains comprehensive self-reported information on the health

status, health care use and expenditures, health insurance coverage, and socioeconomic and demographic characteristics of the entire spectrum of Medicare beneficiaries. Medicare claims data for beneficiaries enrolled in fee-for-service plans are also used to provide more accurate information on health care use and expenditures. MCBS years 2007-2010 are used for estimating medical cost and enrollment models. See section 5.1 for discussion.

### 3 Estimation

In this section we describe the approach used to estimate the transition model, the core of the FAM, and the initial cohort model which is used to rejuvenate the simulation population.

#### 3.1 Transition model

We consider a large set of outcomes for which we model transitions. Table 5 gives the set of outcomes considered for the transition model along with descriptive statistics and the population at risk when estimating the relationships.

Since we have a stock sample from the age 25+ population, each respondent goes through an individual-specific series of intervals. Hence, we have an unbalanced panel over the age range starting from 25 years old. Denote by  $j_{i0}$  the first age at which respondent  $i$  is observed and  $j_{iT_i}$  the last age when he is observed. Hence we observe outcomes at ages  $j_i = j_{i0}, \dots, j_{iT_i}$ .

We first start with discrete outcomes which are absorbing states (e.g. disease diagnostic, mortality, benefit claiming). Record as  $h_{i,j_i,m} = 1$  if the individual outcome  $m$  has occurred as of age  $j_i$ . We assume the individual-specific component of the hazard can be decomposed in a time invariant and variant part. The time invariant part is composed of the effect of observed characteristics  $x_i$  that are constant over the entire life course and initial conditions  $h_{i,j_0,-m}$  (outcomes other than the outcome  $m$ ) that are determined before the first age in which each individual is observed. The time-varying part is the effect of previously diagnosed outcomes  $h_{i,j_i-1,-m}$ , on the hazard for  $m$ .<sup>1</sup> We assume an index of the form  $z_{m,j_i} = x_i\beta_m + h_{i,j_i-1,-m}\gamma_m + h_{i,j_0,-m}\psi_m$ . Hence, the latent component of the hazard is modeled as

$$h_{i,j_i,m}^* = x_i\beta_m + h_{i,j_i-1,-m}\gamma_m + h_{i,j_0,-m}\psi_m + a_{m,j_i} + \varepsilon_{i,j_i,m}, \quad (1)$$

$$m = 1, \dots, M_0, j_i = j_{i0}, \dots, j_{iT_i}, i = 1, \dots, N$$

The term  $\varepsilon_{i,j_i,m}$  is a time-varying shock specific to age  $j_i$ . We assume that this last shock is normally distributed and uncorrelated across diseases. We approximate  $a_{m,j_i}$  with an age spline with knots at ages 35, 45, 55, 65, and 75. This simplification is made for computational reasons since the joint estimation with unrestricted age fixed effects for each condition would imply a large number of parameters. The absorbing outcome, conditional on being at risk, is defined as

$$h_{i,j_i,m} = \max\{I(h_{i,j_i,m}^* > 0), h_{i,j_i-1,m}\}$$

The occurrence of mortality censors observation of other outcomes in a current year.

A number of restrictions are placed on the way feedback is allowed in the model. Table 6 documents restrictions placed on the transition model. We also include a set of other controls. A list of such controls is given in Table 7 along with descriptive statistics.

We have five other types of outcomes:

---

<sup>1</sup>With some abuse of notation,  $j_i - 1$  denotes the previous age at which the respondent was observed.

1. First, we have binary outcomes which are not an absorbing state, such as starting smoking. We specify latent indices as in (1) for these outcomes as well but where the lag dependent outcome also appears as a right-hand side variable. This allows for state-dependence.
2. Second, we have ordered outcomes. These outcomes are also modeled as in (1) recognizing the observation rule is a function of unknown thresholds  $\varsigma_m$ . Similarly to binary outcomes, we allow for state-dependence by including the lagged outcome on the right-hand side.
3. The third type of outcomes we consider are censored outcomes, such as financial wealth. For wealth, there are a non-negligible number of observations with zero and negative wealth. For these, we consider two part models where the latent variable is specified as in (1) but model probabilities only when censoring does not occur. In total, we have  $M$  outcomes.
4. The fourth type of outcomes are continuous outcomes modeled with ordinary least squares. For example, we model transitions in  $\log(\text{BMI})$ . We allow for state-dependence by including the lagged outcome on the right-hand side.
5. The final type of models are categorical, but without an ordering. For example, an individual can transition to being out of the labor force, unemployed, or working (either full- or part-time). In situations like this, we utilize a multinomial logit model, including the lagged outcome on the right-hand side.

The parameters  $\theta_1 = \left( \{\beta_m, \gamma_m, \psi_m, \varsigma_m\}_{m=1}^M \right)$ , can be estimated by maximum likelihood. Given the normality distribution assumption on the time-varying unobservable, the joint probability of all time-intervals until failure, right-censoring or death conditional on the initial conditions  $h_{i,j_0,-m}$  is the product of normal univariate probabilities. Since these sequences, conditional on initial conditions, are also independent across diseases, the joint probability over all disease-specific sequences is simply the product of those probabilities.

For a given respondent observed from initial age  $j_{i0}$  to a last age  $j_{Ti}$ , the probability of the observed health history is (omitting the conditioning on covariates for notational simplicity)

$$l_i^{-0}(\theta; h_{i,j_{i0}}) = \left[ \prod_{m=1}^{M-1} \prod_{j=j_{i1}}^{j_{Ti}} P_{ij,m}(\theta)^{(1-h_{ij-1,m})(1-h_{ij,M})} \right] \times \left[ \prod_{j=j_{i1}}^{j_{Ti}} P_{ij,M}(\theta) \right]$$

We use the  $-0$  superscript to make explicit the conditioning on  $\mathbf{h}_{i,j_{i0}} = (h_{i,j_{i0},0}, \dots, h_{i,j_{i0},M})'$ . We have limited information on outcomes prior to this age. The likelihood is a product of  $M$  terms with the  $m$ th term containing only  $(\beta_m, \gamma_m, \psi_m, \varsigma_m)$ . This allows the estimation to be done separately for each outcome.

### 3.1.1 Further Details on Specific Transition Models

This section describes the modeling strategy for particular outcomes.

**Employment Status** Ultimately, we wish to simulate if an individual is out of the labor force, unemployed, working part-time, or working full-time at time  $t$ . We treat the estimation of this as a two-stage process. In the first stage, we predict if the individual is out of the labor force, unemployed, or working for pay using a multinomial logit model. Then, conditional on working for pay, we estimate if the individual is working part- or full-time using a probit model.

**Earnings** We estimate last calendar year earnings models based on the current employment status, controlling for the prior employment status. Of particular concern are individuals with no earnings, representing approximately twenty-five percent of the unemployed and seventy-eight percent of those out of the labor force. This group is less than 0.5% of the full- and part-time populations. We use a two-stage process for those out of the labor force and unemployed. The first stage is a probit that estimates if the individual has any earnings. The second stage is an OLS model of  $\log(\text{earnings})$  for those with non-zero earnings. For those working full- or part-time, we estimate OLS models of  $\log(\text{earnings})$ .

**Relationship Status** We are interested in three relationship statuses: single, cohabitating, and married. In each case, we treat the transition from time  $t$  to time  $t + 1$  as a two-stage process. In the first stage, we estimate if the individual will remain in their current status. In the second stage, we estimate which of the two other states the individual will transition to, conditional on leaving their current state.

**Childbearing** We estimate the number of children born in two-years separately for women and men. We model this using an ordered probit with three categories: no new births, one birth, and two births. Based on the PSID data, we found the exclusion of three or more births in a two-year period to be appropriate.

### 3.1.2 Inverse Hyperbolic Sine Transformation

One problem fitting the wealth distribution is that it has a long right tail and some negative values. We use a generalization of the inverse hyperbolic sine transform (IHT) presented in MacKinnon and Magee (1990). First denote the variable of interest  $y$ . The hyperbolic sine transform is

$$y = \sinh(x) = \frac{\exp(x) - \exp(-x)}{2} \quad (2)$$

The inverse of the hyperbolic sine transform is

$$x = \sinh^{-1}(y) = h(y) = \log(y + (1 + y^2)^{1/2})$$

Consider the inverse transformation. We can generalize such transformation, first allowing for a shape parameter  $\theta$ ,

$$r(y) = h(\theta y) / \theta \quad (3)$$

Such that we can specify the regression model as

$$r(y) = x\beta + \varepsilon, \varepsilon \sim N(0, \sigma^2) \quad (4)$$

A further generalization is to introduce a location parameter  $\omega$  such that the new transformation becomes

$$g(y) = \frac{h(\theta(y + \omega)) - h(\theta\omega)}{\theta h'(\theta\omega)} \quad (5)$$

where  $h'(a) = (1 + a^2)^{-1/2}$ .

We specify (4) in terms of the transformation  $g$ . The shape parameters can be estimated from the concentrated likelihood for  $\theta, \omega$ . We can then retrieve  $\beta, \sigma$  by standard OLS.

Upon estimation, we can simulate

$$\tilde{g} = x\hat{\beta} + \sigma\tilde{\eta}$$

where  $\eta$  is a standard normal draw. Given this draw, we can retransform using (5) and (2)

$$h(\theta(y + \omega)) = \theta h'(\theta\omega)\tilde{g} + h(\theta\omega)$$

$$\tilde{y} = \frac{\sinh[\theta h'(\theta\omega)\tilde{g} + h(\theta\omega)] - \theta\omega}{\theta}$$

The included estimates table (estimates\_FAM.xml) gives parameter estimates for the transition models.

## 4 Model for replenishing cohorts

We first discuss the empirical strategy, then present the model and estimation results. The model for replenishing cohorts integrates information coming from trends among younger cohorts with the joint distribution of outcomes in the current population of age 25 respondents in the PSID.

### 4.1 Model and estimation

Assume the latent model for  $\mathbf{y}_i^* = (y_{i1}^*, \dots, y_{iM}^*)'$ ,

$$\mathbf{y}_i^* = \boldsymbol{\mu} + \boldsymbol{\varepsilon}_i,$$

where  $\boldsymbol{\varepsilon}_i$  is normally distributed with mean zero and covariance matrix  $\boldsymbol{\Omega}$ . It will be useful to write the model as

$$\mathbf{y}_i^* = \boldsymbol{\mu} + \mathbf{L}_\Omega \boldsymbol{\eta}_i,$$

where  $\mathbf{L}_\Omega$  is a lower triangular matrix such that  $\mathbf{L}_\Omega \mathbf{L}'_\Omega = \boldsymbol{\Omega}$  and  $\boldsymbol{\eta}_i = (\eta_{i1}, \dots, \eta_{iM})'$  are standard normal. We observe  $y_i = \Gamma(y_i^*)$  which is a non-invertible mapping for a subset of the  $M$  outcomes. For example, we have binary, ordered and censored outcomes for which integration is necessary.

The vector  $\boldsymbol{\mu}$  can depend on some variables which have a stable distribution over time  $\mathbf{z}_i$  (say race, gender and education). This way, estimation preserves the correlation with these outcomes without having to estimate their correlation with other outcomes. Hence, we can write

$$\boldsymbol{\mu}_i = \mathbf{z}_i \boldsymbol{\beta}$$

and the whole analysis is done conditional on  $\mathbf{z}_i$ .

For binary and ordered outcomes, we fix  $\Omega_{m,m} = 1$  which fixes the scale. Also we fix the location of the ordered models by fixing thresholds as  $\tau_0 = -\infty$ ,  $\tau_1 = 0$ ,  $\tau_K = +\infty$ , where  $K$  denotes the number of categories for a particular outcome. We also fix to zero the correlation between selected outcomes (say earnings) and their selection indicator. Hence, we consider two-part models for these outcomes. Because some parameters are naturally bounded, we also re-parameterize the problem to guarantee an interior solution. In particular, we parameterize

$$\Omega_{m,m} = \exp(\delta_m), \quad m = m_0 - 1, \dots, M$$

$$\Omega_{m,n} = \tanh(\xi_{m,n}) \sqrt{\Omega_{m,m} \Omega_{n,n}}, \quad m, n = 1, \dots, N$$

$$\tau_{m,k} = \exp(\gamma_{m,k}) + \tau_{k-1}, \quad k = 2, \dots, K_m - 1, m \text{ ordered}$$

and estimate the  $(\delta_{m,m}, \xi_{m,n}, \gamma_k)$  instead of the original parameters. The parameter values are estimated using the *cmp* package in Stata (Roodman, 2011). Table 8 gives parameter estimates for the indices while Table 9 gives parameter estimates of the covariance matrix in the outcomes.

## 4.2 Trends for replenishing cohorts

Using the jointly estimated models previously described, we then assign outcomes to the replenishing cohorts, imposing trends for some health, risk factor, and social outcomes. We currently impose trends on BMI, education, number of children, marital status, hypertension, and smoking status for these 25-26 year olds. These trends are estimated using the National Health Interview Survey (health and risk factors) or the American Community Survey (social outcomes). All trends are halted after 2029. The trends are shown in Table 10, Table 11 and Table 12.

## 5 Government revenues and expenditures

This gives a limited overview of how revenues and expenditures of the government are computed.

### 5.1 Medical costs estimation

In the FAM, a cost module links a person's current state—demographics, economic status, current health, risk factors, and functional status to 4 types of individual medical spending. The FAM models: total medical spending (medical spending from all payment sources), Medicare spending<sup>2</sup>, Medicaid spending (medical spending paid by Medicaid), and out of pocket spending (medical spending by the respondent). These estimates are based on pooled weighted least squares regressions of each type of spending on risk factors, self-reported conditions, and functional status, with spending inflated to constant dollars using the medical component of the consumer price index. We use the 2007-2010 Medical Expenditure Panel Survey for these regressions for persons not Medicare eligible, and the 2007-2010 Medicare Current Beneficiary Survey for spending for those that are eligible for Medicare. Those eligible for Medicare include people eligible due to age (65+) or due to disability status. Comparisons of prevalences and question wording across these different sources are provided in Tables 3 and 4, respectively.

In the baseline scenario, this spending estimate can be interpreted as the resources consumed by the individual given the manner in which medicine is practiced in the United States during the post-part D era (2006-2010). Models are estimated for total, Medicaid, out of pocket spending, and for the Medicare spending.

Since Medicare spending has numerous components (Parts A and B are considered here), models are needed to predict enrollment. In 2004, 98.4% of all Medicare enrollees, and 99%+ of aged enrollees, were in Medicare Part A, and thus we assume that all persons eligible for Medicare take Part A. We use the 2007-2010 MCBS to model take up of Medicare Part B for both new enrollees into Medicare, as well as current enrollees without Part B. Estimates are based on weighted probit regression on various risk factors, demographic, and economic conditions. The PSID starting population for the FAM does not contain information on Medicare enrollment. Therefore another model of Part B enrollment for all persons eligible for Medicare is estimated via a probit, and used in the first year of simulation to assign initial Part B enrollment status. Estimation results are shown in estimates table. The MCBS data over represents the portion enrolled in Part B, having a 97% enrollment rate in 2004 instead of the 93.5% rate given by Medicare Trustee's Report. In addition to this baseline enrollment probit, we apply an elasticity to premiums of -0.10, based on the literature and simulation calibration for actual uptake through 2009 (Atherly et al., 2004;

---

<sup>2</sup>We estimate annual medical spending paid by specific parts of Medicare (Parts A, B, and D) and sum to get the total Medicare expenditures.

Buchmueller, 2006). The premiums are computed using average Part B costs from the previous time step and the means-testing thresholds established by the ACA.

Since 2006, the Medicare Current Beneficiaries Survey (MCBS) contains data on Medicare Part D. The data gives the capitated Part D payment and enrollment. When compared to the summary data presented in the CMS 2007 Trustee Report, the 2006 per capita cost is comparable between the MCBS and the CMS. However, the enrollment is underestimated in the MCBS, 53% compared to 64.6% according to CMS.

A cross-sectional probit model is estimated using years 2007-2010 to link demographics, economic status, current health, and functional status to Part D enrollment - see the estimates table. To account for both the initial under reporting of Part D enrollment in the MCBS, as well as the CMS prediction that Part D enrollment will rise to 75% by 2012, the constant in the probit model is increased by 0.22 in 2006, to 0.56 in 2012 and beyond. The per capita Part D cost in the MCBS matches well with the cost reported from CMS. An OLS regression using demographic, current health, and functional status is estimated for Part D costs based on capitated payment amounts.

The Part D enrollment and cost models are implemented in the Medical Cost module. The Part D enrollment model is executed conditional on the person being eligible for Medicare, and the cost model is executed conditional on the enrollment model leading a true result, after the Monte Carlo decision. Otherwise the person has zero Part D cost. The estimated Part D costs are added with Part A and B costs to obtain total Medicare cost, and any medical cost growth assumptions are then applied.

## 6 Implementation

The FAM is implemented in multiple parts. Estimation of the transition and cross sectional models is performed in Stata. The replenishing cohort model is estimated in Stata using the CMP package (Roodman, 2011). The simulation is implemented in C++ for speed and flexibility. Currently, the simulation is run on Linux, Windows, and Mac OS X.

To match the two year structure of the PSID data used to estimate the transition models, the FAM simulation proceeds in two year increments. The end of each two year step is designed to occur on July 1st to allow for easier matching to population forecasts from Social Security. A simulation of the FAM proceeds by first loading a population representative of the age 25+ US population in 2009, generated from PSID. In two year increments, the FAM applies the transition models for mortality, health, working, wealth, earnings, and benefit claiming with Monte Carlo decisions to calculate the new states of the population. Once the simulation begins, trends in mortality are applied. Separate mortality rate adjustment factors are defined for the under and over 65 age groups based on the mortality projections from the 2013 SSA Trustees report. The SSA projections are interpolated through 2090, then extended using GLM with log link through 2150. The average yearly all-cause mortality reduction between 2020 and 2150 was 1.06% for ages 25-64, and 0.66% for the 65+ population. The population is also adjusted by immigration forecasts from the US Census Department, stratified by race and age. If incoming cohorts are being used, the new 25/26 year olds are added to the population. The number of new 25/26 year olds added is consistent with estimates from the Census, stratified by race. Once the new states have been determined and new 25/26 year olds added, the cross sectional models for medical costs are performed. Summary variables are then computed. Computation of medical costs includes the persons that died to account for end of life costs. To reduce uncertainty due to the Monte Carlo decision rules, the simulation is performed multiple times (typically 100), and the mean of each summary variable is calculated across repetitions.



FAM simulation takes as inputs assumptions regarding the normal retirement age, real medical cost growth, and interest rates. The default assumptions are taken from the 2010 Social Security Intermediate scenario, adjusted for no price increases after 2010. Therefore simulation results are in real 2009 dollars.

Different simulation scenarios are implemented by changing any of the following components: incoming cohort model, transition models, interventions that adjust the probabilities of specific transition, and changes to assumptions on future economic conditions.

## 6.1 Intervention Module

The intervention module can adjust characteristics of individuals when they are first read into the simulation “init\_interventions” or alter transitions within the simulation “interventions.” At present, init\_interventions can act on chronic diseases, ADL/IADL status, program participation, and some demographic characteristics. Interventions within the simulation can currently act on mortality, chronic diseases, and some program participation variables.

Interventions can take several forms. The most commonly used is an adjustment to a transition probability. One can also delay the assignment of a chronic condition or cure an existing chronic condition. Additional flexibility comes from selecting who is eligible for the intervention. Some examples might help to make the interventions concrete.

- Example 1: Delay the enrollment into Social Security OASI by two years. In this scenario claiming of Social Security benefits is transitioned as normal. However, if a person is predicted to claim their benefits, then that status is not immediately assigned, but is instead assigned two years later.
- Example 2: Cure hypertension for those with no other chronic diseases. In this scenario any individual with hypertension (including those who have had hypertension for many years) is cured (hypertension status is set to 0), as long as they do not have other chronic diseases. This example uses the individuals chronic disease status as the eligibility criteria for the intervention.
- Example 3: Reduce the incidence of hypertension for half of men aged 55 to 65 by 10% in the first year of the simulation, gradually increasing the reduction to 20% after 10 years. This example begins to show the flexibility in the intervention module. The eligibility criteria are more complex (half of men in a specific age range are eligible) and the intervention changes over time. Mathematically, the intervention works by acting on the incidence probability,  $\rho$ . In the first year of the simulation, the probability is replaced by  $(1 - 0.5 * 0.1) \rho = 0.95\rho$ . The binary outcome is then assigned based on this new probability. Thus, at the population level, there is a 5% reduction in incidence for men aged 55 to 65, as desired. After 10 years, the probability for this eligible population becomes  $(1 - 0.5 * 0.2) \rho = 0.9\rho$ .

More elaborate interventions can be programmed by the user.

## 7 Validation

We perform data-splitting and external corroboration exercises. Data splitting is a test of the simulations internal validity that compares simulated outcomes to actual outcomes. External corroboration compares model forecasts to others forecasts.

## 7.1 Data Splitting

The data-splitting exercise randomly samples half of the PSID respondent IDs for use in estimating the transition models. The respondents not used for estimation, but who were present in the PSID sample in 1999, are then simulated from 1999 through 2013. Demographic, health, and economic outcomes are compared between the simulated (FAM) and actual (PSID) populations.

Worth noting is how the composition of the population changes in this exercise. In 1999, the sample represents those 25 and older. Since we follow a fixed cohort, the age of the population will increase to 39 and older in 2013. This has consequences for some measures in later years where the eligible population shrinks.

### 7.1.1 Demographics

Mortality and demographic measures are presented in Tables 13 and 14. Mortality incidence is comparable between the simulated and observed populations. Demographic characteristics do not differ between the two, except for age, which is slightly lower in the simulation population.

### 7.1.2 Health Outcomes

Binary health outcomes are presented in Table 15. FAM underestimates the prevalence of IADL limitations compared to the actual population. Binary outcomes, like diabetes, heart disease, lung disease and stroke do not differ. FAM overestimates cancer and hypertension compared to the actual population.

### 7.1.3 Health Risk Factors

Risk factors are presented in Table 16. FAM overestimates average BMI and underestimates smoking behavior compared to the actual population. In terms of practical significance, this difference in average BMI is equivalent to 1.4 pounds for an individual who is 58.

### 7.1.4 Economic Outcomes

Binary economic outcomes are presented in Table 17. FAM underpredicts claiming of federal disability claiming. Social Security retirement claiming, Supplemental Security claiming, and working for pay are not statistically different between FAM and the actual population.

On the whole, the data-splitting exercise is reassuring. There are differences that will be explored and improved upon in the future.

## 7.2 External Corroboration

Finally, we compare FAM population forecasts to Census forecasts of the US population. Here, we focus on the full PSID population (25 and older) and those 65 and older. For this exercise, we begin the simulation in 2009 and simulate the full population through 2049. Population projections are compared to the 2012 Census projections for years 2012 through 2049. See results in Table 18. By 2049, FAM forecasts for 25 and older remain within 2% of Census forecasts.

## 8 Baseline Forecasts

In this section we present baseline forecasts of the Future Adult Model. The figures show data from the PSID for the 25+ population from 1999 through 2009 and forecasts from the FAM for the 25+ population beginning in 2009.

### 8.1 Disease Prevalence

Figure 2 depicts the six chronic conditions we project for men. And Figure 3 depicts the historic and forecasted values for women.

Figure 4 shows historic and forecasted levels for any ADL difficulties, three or more ADL difficulties, any IADL difficulties, and two or more IADL difficulties for men 25 and older. Figure 5 shows historic and forecasted levels for any ADL difficulties, three or more ADL difficulties, any IADL difficulties, and two or more IADL difficulties for women 25 and older.

## 9 Acknowledgments

The Future Elderly Model and Future Adult Model has been developed by a large team over the last decade. Jay Bhattacharya, Eileen Crimmins, Christine Eibner, Étienne Gaudette, Geoff Joyce, Darius Lakdawalla, Pierre-Carl Michaud, and Julie Zissimopoulos have all provided expert guidance. Adam Gailey, Baoping Shang, and Igor Vaynman provided programming and analytic support during the first years of FEM development at RAND. Jeff Sullivan then led the technical development for several years. More recently, the University of Southern California research programming team has supported model development, including FAM development. These programmers include Patricia St. Clair, Laura Gascue, Henu Zhao, and Yuhui Zheng. Barbara Blaylock, Malgorzata Switek, and Wendy Cheng have greatly aided model development while working as research assistants at USC.

## 10 Tables

| <b>Economic Outcomes</b> | <b>Health Outcomes</b> | <b>Other Outcomes</b> |
|--------------------------|------------------------|-----------------------|
| Work Status              | BMI Category           | Education             |
| Earnings                 | Smoking Category       | Partnered             |
| Wealth                   | Hypertension           | Partner Type          |
|                          |                        | Health Insurance      |

Table 1: Estimated outcomes in replenishing cohorts module

| <b>Economic Outcomes</b>                      | <b>Health Outcomes</b> | <b>Marital Status</b>   | <b>Other Outcomes</b> |
|-----------------------------------------------|------------------------|-------------------------|-----------------------|
| Social Security Claiming                      | Mortality              | Exit Single             | Insurance Type        |
| Disability Claiming                           | Heart Disease          | Exit Cohabitation       |                       |
| Non-Zero Capital Income                       | Cancer                 | Exit Married            |                       |
| Capital Income (if non-zero)                  | Hypertension           | Single to Married       |                       |
| Non-zero Government Transfers                 | Diabetes               | Cohabitation to Married |                       |
| Government Transfers (if non-zero)            | Lung Disease           | Married to Cohabitation |                       |
| Non-zero Wealth                               | Start Smoking          |                         |                       |
| Wealth (if non-zero)                          | Stop Smoking           |                         |                       |
| Labor Force Status (out, unemployed, working) | ADL Status             |                         |                       |
| Employed Full- or Part-time (if working)      | IADL Status            |                         |                       |
| Any Earnings (if Unemployed)                  | Births/Paternity       |                         |                       |
| Any Earnings (if Not in Labor Force)          | Self-reported Health   |                         |                       |
| Earnings (if Full-time)                       | BMI                    |                         |                       |
| Earnings (if Part-time)                       | Partner Death          |                         |                       |
| Earnings (if Unemployed and any)              |                        |                         |                       |
| Earnings (if Not in Labor Force and any)      |                        |                         |                       |

Table 2: Estimated outcomes in transitions module

| Source (years, ages)    | Prevalence % |                |        |          |              |              |            |       |  |  |
|-------------------------|--------------|----------------|--------|----------|--------------|--------------|------------|-------|--|--|
|                         | Cancer       | Heart Diseases | Stroke | Diabetes | Hypertension | Lung Disease | Overweight | Obese |  |  |
| HRS (2004-2008, 50-64)  | 8%           | 14%            | 4%     | 16%      | 45%          | 7%           | 37%        | 37%   |  |  |
| HRS (2004-2008, 65+)    | 19%          | 31%            | 11%    | 23%      | 63%          | 11%          | 38%        | 27%   |  |  |
| MCBS (2007-2010, 65+)   | 19%          | 41%            | 11%    | 25%      | 68%          | 17%          | 38%        | 26%   |  |  |
| MEPS (2007-2010, 25-49) | 2%           | 6%             | 1%     | 4%       | 18%          | 4%           | 35%        | 30%   |  |  |
| MEPS (2007-2010, 50-64) | 6%           | 16%            | 4%     | 14%      | 46%          | 7%           | 37%        | 34%   |  |  |
| MEPS (2007-2010, 65+)   | 14%          | 36%            | 12%    | 21%      | 68%          | 11%          | 38%        | 27%   |  |  |
| NHIS (2007-2009, 25-49) | 2%           | 6%             | 1%     | 4%       | 16%          | 4%           | 34%        | 31%   |  |  |
| NHIS (2007-2009, 50-64) | 7%           | 14%            | 3%     | 13%      | 41%          | 7%           | 36%        | 35%   |  |  |
| NHIS (2007-2009, 65+)   | 17%          | 32%            | 9%     | 19%      | 61%          | 10%          | 36%        | 27%   |  |  |
| PSID (2007-2011, 25-49) | 2%           | 4%             | 1%     | 4%       | 12%          | 3%           | 34%        | 28%   |  |  |
| PSID (2007-2011, 50-64) | 6%           | 14%            | 3%     | 13%      | 34%          | 8%           | 39%        | 30%   |  |  |
| PSID (2007-2011, 65+)   | 16%          | 34%            | 8%     | 20%      | 54%          | 14%          | 38%        | 23%   |  |  |

Table 3: Health condition prevalences in survey data

|                |                                                                                                                                            | Survey                                                                                                                                                                                                                                        |                                                                                                                                                                     |                                                                                                                                                                                         |
|----------------|--------------------------------------------------------------------------------------------------------------------------------------------|-----------------------------------------------------------------------------------------------------------------------------------------------------------------------------------------------------------------------------------------------|---------------------------------------------------------------------------------------------------------------------------------------------------------------------|-----------------------------------------------------------------------------------------------------------------------------------------------------------------------------------------|
| Disease        | PSID/HRS                                                                                                                                   | NHIS                                                                                                                                                                                                                                          | MEPS                                                                                                                                                                | MCBS                                                                                                                                                                                    |
| Cancer         | Has a doctor ever told you that you have cancer or a malignant tumor, excluding minor skin cancers?                                        | Have you ever been told by a doctor or other health professional that you had cancer or a malignancy of any kind? (WHEN RECODED, SKIN CANCERS WERE EXCLUDED)                                                                                  | List all the conditions that bothered (the person) from (START time) to (END time) CCS codes for the conditions list are 11-21, 24-45                               | Has a doctor ever told you that you had any (other) kind of cancer malignancy, or tumor other than skin cancer?                                                                         |
| Heart Diseases | Has a doctor ever told you that you had a heart attack, coronary heart disease, angina, congestive heart failure, or other heart problems? | Four separate questions were asked about whether ever told by a doctor or other health professional that had: CHD, Angina, MI, other heart problems.                                                                                          | Have you ever been told by a doctor or health professional that you have CHD; Angina; MI; other heart problems                                                      | Six separate questions were asked about whether ever told by a doctor that had: Angina or MI; CHD; other heart problems (included four questions)                                       |
| Stroke         | Has a doctor ever told you that you had a stroke?                                                                                          | Have you EVER been told by a doctor or other health professional that you had a stroke?                                                                                                                                                       | If Female, add: [Other than during pregnancy.] Have you ever been told by a doctor or health professional that you have a stroke or TIA (transient ischemic attack) | [Since (PREV < SUPP. RD. INT. DATE).] has a doctor (ever) told (you/SP) that (you/he/she) had a stroke, a brain hemorrhage, or a cerebrovascular accident?                              |
| Diabetes       | Has a doctor ever told you that you have diabetes or high blood sugar?                                                                     | If Female, add: [Other than during pregnancy.] Have you ever been told by a doctor or health professional that you have diabetes or sugar diabetes?                                                                                           | If Female, add: [Other than during pregnancy.] Have you ever been told by a doctor or health professional that you have diabetes or sugar diabetes?                 | Has a doctor (ever) told (you/SP) that (you/he/she) had diabetes, high blood sugar, or sugar in (your/his/her) urine? [DO NOT INCLUDE BOORDERLINE PREGNANCY, OR PRE-DIABETIC DIABETES.] |
| Hypertension   | Has a doctor ver told you that you have high blood pressure or hypertension?                                                               | Have you EVER been told by a doctor or other health professional that you had Hypertension, also called high blood pressure?                                                                                                                  | Have you EVER been told by a doctor or other health professional that you had Hypertension, also called high blood pressure?                                        | Has a doctor (ever) told (you/SP) that (you/he/she) (still) (had) (have/has) hypertension, sometimes called high blood pressure?                                                        |
| Lung Disease   | Has a doctor ever told you that you have chronic lung disease such a schronic bronchitis or emphysema? [IWER: DO NOT INCLUDE ASTHMA]       | Question 1: During the PAST 12 MONTHS, have you ever been told by a doctor or other health professional that you had chronic bronchitis? Question 2: Have you EVER been told by a doctor or other health professional that you had emphysema? | List all the conditions that bothered (the person) from (START time) to (END time) CCS codes for the conditions list are 127, 129-312                               | Has a doctor (ever) told (you/SP) that (you/he/she) had emphysema, asthma, or COPD? [COPD=CHRONIC OBSTRUCTIVE PULMONARY DISEASE.]                                                       |
| Overweight     |                                                                                                                                            |                                                                                                                                                                                                                                               |                                                                                                                                                                     |                                                                                                                                                                                         |
| Obese          |                                                                                                                                            |                                                                                                                                                                                                                                               |                                                                                                                                                                     |                                                                                                                                                                                         |
|                |                                                                                                                                            |                                                                                                                                                                                                                                               | Self-reported body weight and height                                                                                                                                |                                                                                                                                                                                         |

Table 4: Survey questions used to determine health conditions

|                                |                      | Type               | At risk                  | Mean/fraction |
|--------------------------------|----------------------|--------------------|--------------------------|---------------|
| Disease                        | heart disease        | biennial incidence | undiagnosed              | 0.02          |
|                                | hypertension         | biennial incidence | undiagnosed              | 0.04          |
|                                | stroke               | biennial incidence | undiagnosed              | 0.01          |
|                                | lung disease         | biennial incidence | undiagnosed              | 0.01          |
|                                | cancer               | biennial incidence | undiagnosed              | 0.01          |
|                                | diabetes             | biennial incidence | undiagnosed              | 0.01          |
| Smoking Status                 | never smoked         | ordered            | all                      | 0.51          |
|                                | ex smoker            | ordered            | all                      | 0.30          |
|                                | current smoker       | ordered            | all                      | 0.19          |
| Risk Factors                   | Log BMI              | continuous         | all                      | 3.31          |
|                                | no ADLs              | ordered            | all                      | 0.90          |
|                                | 1 ADL                | ordered            | all                      | 0.05          |
|                                | 2 ADLS               | ordered            | all                      | 0.02          |
|                                | 3+ ADLS              | ordered            | all                      | 0.03          |
| IADL Status                    | no IADLs             | ordered            | all                      | 0.89          |
|                                | 1 IADL               | ordered            | all                      | 0.07          |
|                                | 2+ IADLs             | ordered            | all                      | 0.04          |
| Employment Status              | out of labor force   | prevalence         | all                      | 0.26          |
|                                | unemployed           | prevalence         | all                      | 0.06          |
|                                | part time            | prevalence         | all                      | 0.18          |
|                                | full time            | prevalence         | all                      | 0.50          |
| LFP & Benefits                 | SS benefit receipt   | biennial incidence | eligible & not receiving |               |
|                                | DI benefit receipt   | prevalence         | eligible & age < 65      | 0.03          |
|                                | Any health insurance | prevalence         | age < 65                 | 0.83          |
|                                | SSI receipt          | prevalence         | all                      | 0.02          |
| Marital status                 | single               | prevalence         | all                      | 0.28          |
|                                | cohabitating         | prevalence         | all                      | 0.09          |
|                                | married              | prevalence         | all                      | 0.63          |
| Childbearing                   | no children          | biennial incidence | female                   | 0.91          |
|                                | 1 child              | biennial incidence | female                   | 0.09          |
|                                | 2 children           | biennial incidence | female                   | 0.00          |
| Financial Resources (\$K 2009) | financial wealth     | median             | all non-zero wealth      | 56.89         |
|                                | earnings             | median             | working full time        | 17.58         |
|                                | earnings             | median             | working part time        | 40.34         |
|                                | wealth non-zero      | prevalence         | all                      | 0.95          |

Table 5: Outcomes in the transition model. Estimation sample is PSID 1999-2013 waves.

|                   | Outcome at time $T$ |              |        |              |          |        |            |           |                |     |        |          |          |          |           |              |      |          |                |        |   |
|-------------------|---------------------|--------------|--------|--------------|----------|--------|------------|-----------|----------------|-----|--------|----------|----------|----------|-----------|--------------|------|----------|----------------|--------|---|
|                   | Heart disease       | hypertension | stroke | Lung disease | diabetes | cancer | disability | mortality | Smoking status | BMI | Any HI | DI Claim | SS Claim | DB Claim | SSI Claim | Nursing Home | Work | Earnings | Nonzero Wealth | Wealth |   |
| Heart disease     | ✓                   |              | ✓      |              |          |        | ✓          | ✓         | ✓              | ✓   | ✓      | ✓        | ✓        | ✓        | ✓         | ✓            | ✓    | ✓        | ✓              | ✓      | ✓ |
| Blood pressure    |                     |              | ✓      |              |          |        | ✓          | ✓         | ✓              | ✓   | ✓      | ✓        | ✓        | ✓        | ✓         | ✓            | ✓    | ✓        | ✓              | ✓      | ✓ |
| Stroke            |                     |              | ✓      |              |          |        | ✓          | ✓         | ✓              | ✓   | ✓      | ✓        | ✓        | ✓        | ✓         | ✓            | ✓    | ✓        | ✓              | ✓      | ✓ |
| Lung disease      |                     |              |        |              |          |        | ✓          | ✓         | ✓              | ✓   | ✓      | ✓        | ✓        | ✓        | ✓         | ✓            | ✓    | ✓        | ✓              | ✓      | ✓ |
| Diabetes          | ✓                   | ✓            |        |              |          |        | ✓          | ✓         | ✓              | ✓   | ✓      | ✓        | ✓        | ✓        | ✓         | ✓            | ✓    | ✓        | ✓              | ✓      | ✓ |
| Cancer            |                     |              |        |              |          |        | ✓          | ✓         | ✓              | ✓   | ✓      | ✓        | ✓        | ✓        | ✓         | ✓            | ✓    | ✓        | ✓              | ✓      | ✓ |
| Disability        |                     |              |        |              |          |        | ✓          | ✓         | ✓              | ✓   | ✓      | ✓        | ✓        | ✓        | ✓         | ✓            | ✓    | ✓        | ✓              | ✓      | ✓ |
| Claimed DI        |                     |              |        |              |          |        | ✓          | ✓         | ✓              | ✓   | ✓      | ✓        | ✓        | ✓        | ✓         | ✓            | ✓    | ✓        | ✓              | ✓      | ✓ |
| Claimed SS        |                     |              |        |              |          |        | ✓          | ✓         | ✓              | ✓   | ✓      | ✓        | ✓        | ✓        | ✓         | ✓            | ✓    | ✓        | ✓              | ✓      | ✓ |
| Claimed DB        |                     |              |        |              |          |        | ✓          | ✓         | ✓              | ✓   | ✓      | ✓        | ✓        | ✓        | ✓         | ✓            | ✓    | ✓        | ✓              | ✓      | ✓ |
| Claimed SSI       |                     |              |        |              |          |        | ✓          | ✓         | ✓              | ✓   | ✓      | ✓        | ✓        | ✓        | ✓         | ✓            | ✓    | ✓        | ✓              | ✓      | ✓ |
| Work              |                     |              |        |              |          |        |            |           |                |     |        |          | ✓        | ✓        | ✓         | ✓            | ✓    | ✓        | ✓              | ✓      | ✓ |
| Earnings          |                     |              |        |              |          |        |            |           |                |     |        | ✓        | ✓        | ✓        | ✓         | ✓            | ✓    | ✓        | ✓              | ✓      | ✓ |
| Nonzero wealth    |                     |              |        |              |          |        |            |           |                |     | ✓      | ✓        | ✓        | ✓        | ✓         | ✓            | ✓    | ✓        | ✓              | ✓      | ✓ |
| Wealth            |                     |              |        |              |          |        |            |           |                |     | ✓      | ✓        | ✓        | ✓        | ✓         | ✓            | ✓    | ✓        | ✓              | ✓      | ✓ |
| Nursing home stay |                     |              |        |              |          |        |            |           |                |     |        |          |          |          |           | ✓            | ✓    | ✓        | ✓              | ✓      | ✓ |

Table 6: Restrictions on transition model. ✓ indicates that an outcome at time  $T - 1$  is allowed in the transition model for an outcome at time  $T$ .



| Control variable                     | Mean   | Standard deviation | Minimum | Maximum |
|--------------------------------------|--------|--------------------|---------|---------|
| Non-Hispanic black                   | 0.112  | 0.315              | 0       | 1       |
| Hispanic                             | 0.127  | 0.333              | 0       | 1       |
| Single                               | 0.343  | 0.475              | 0       | 1       |
| Cohabiting                           | 0.0540 | 0.226              | 0       | 1       |
| Married                              | 0.603  | 0.489              | 0       | 1       |
| Less than high school                | 0.133  | 0.340              | 0       | 1       |
| High school/GED/some college/AA      | 0.552  | 0.497              | 0       | 1       |
| College graduate                     | 0.210  | 0.407              | 0       | 1       |
| More than college                    | 0.105  | 0.307              | 0       | 1       |
| Doctor ever - heart disease          | 0.141  | 0.348              | 0       | 1       |
| Doctor ever - hypertension           | 0.248  | 0.432              | 0       | 1       |
| Doctor ever - stroke                 | 0.0295 | 0.169              | 0       | 1       |
| Doctor ever - chronic lung disease   | 0.0676 | 0.251              | 0       | 1       |
| Doctor ever - cancer                 | 0.0516 | 0.221              | 0       | 1       |
| Doctor ever - diabetes               | 0.0889 | 0.285              | 0       | 1       |
| Never smoked                         | 0.473  | 0.499              | 0       | 1       |
| Former smoker                        | 0.346  | 0.476              | 0       | 1       |
| Current smoker                       | 0.180  | 0.385              | 0       | 1       |
| No ADL limitations                   | 0.868  | 0.338              | 0       | 1       |
| 1 ADL limitation                     | 0.0596 | 0.237              | 0       | 1       |
| 2 ADL limitations                    | 0.0262 | 0.160              | 0       | 1       |
| 3 or more ADL limitations            | 0.0459 | 0.209              | 0       | 1       |
| No IADL limitations                  | 0.866  | 0.340              | 0       | 1       |
| 1 IADL limitation                    | 0.0858 | 0.280              | 0       | 1       |
| 2 or more IADL limitations           | 0.0481 | 0.214              | 0       | 1       |
| 25 < BMI < 30                        | 0.365  | 0.481              | 0       | 1       |
| 30 < BMI < 35                        | 0.168  | 0.374              | 0       | 1       |
| 35 < BMI < 40                        | 0.0666 | 0.249              | 0       | 1       |
| BMI > 40                             | 0.0379 | 0.191              | 0       | 1       |
| Any Social Security income LCY       | 0.200  | 0.400              | 0       | 1       |
| Any Disability income LCY            | 0.0389 | 0.193              | 0       | 1       |
| Any Supplemental Security Income LCY | 0.0188 | 0.136              | 0       | 1       |
| Any health insurance LCY             | 0.876  | 0.329              | 0       | 1       |
| Out of labor force                   | 0.318  | 0.466              | 0       | 1       |
| Unemployed                           | 0.0618 | 0.241              | 0       | 1       |
| Working part-time                    | 0.177  | 0.381              | 0       | 1       |
| Working full-time                    | 0.444  | 0.497              | 0       | 1       |
| Earnings in 1000s capped at 200K     | 34.01  | 40.03              | 0       | 200     |
| Wealth in 1000s capped at 2 million  | 270.1  | 457.3              | -1974   | 2000    |

Table 7: Descriptive statistics for variables in 2009 PSID ages 25+ sample used as simulation stock population

| Covariate                         | Education level | Partnered | Partnership type | Weight status | Smoking status | Hypertension | In labor force | Number of biological children |
|-----------------------------------|-----------------|-----------|------------------|---------------|----------------|--------------|----------------|-------------------------------|
| Non-Hispanic black                | -0.32           | -0.66     | -0.64            | 0.37          | -0.38          | 0.23         | 0.14           | 0.39                          |
| Hispanic                          | -0.03           | 0.01      | -0.14            | 0.26          | -0.53          | -0.06        | -0.09          | 0.23                          |
| Male                              | -0.25           | 0.08      | -0.18            | 0.12          | 0.25           | 0.11         | 0.48           | -0.35                         |
| Less than HS/GED                  | 0.00            | -0.53     | 0.64             | 0.04          | 0.75           | 0.07         | -0.32          | -0.12                         |
| College                           | 0.00            | 0.23      | -0.64            | -0.41         | -0.72          | -0.15        | 0.29           | -0.23                         |
| Beyond college                    | 0.00            | 0.50      | -1.29            | -0.78         | -1.04          | -0.26        | -0.02          | -0.07                         |
| R's mother less than high school  | -0.32           | -0.04     | -0.10            | 0.00          | 0.00           | 0.00         | -0.02          | 0.22                          |
| R,s mother some college           | 0.31            | -0.18     | 0.20             | 0.00          | 0.00           | 0.00         | -0.08          | -0.16                         |
| R's mother college graduate       | 0.58            | -0.31     | 0.21             | 0.00          | 0.00           | 0.00         | 0.04           | -0.34                         |
| R's father less than high school  | -0.15           | -0.07     | -0.03            | 0.00          | 0.00           | 0.00         | -0.02          | 0.00                          |
| R,s father some college           | 0.31            | -0.25     | 0.17             | 0.00          | 0.00           | 0.00         | 0.00           | -0.29                         |
| R's father college graduate       | 0.72            | -0.30     | 0.28             | 0.00          | 0.00           | 0.00         | -0.08          | -0.44                         |
| Poor as a child                   | -0.20           | 0.07      | -0.09            | 0.00          | 0.00           | 0.00         | -0.09          | 0.14                          |
| Wealthy as a child                | -0.05           | -0.05     | -0.07            | 0.00          | 0.00           | 0.00         | -0.03          | 0.11                          |
| Fair or poor health before age 17 | -0.17           | -0.07     | -0.09            | 0.00          | 0.00           | 0.00         | -0.19          | 0.00                          |
| Age 25 or 26                      | -0.15           | -0.15     | -0.27            | -0.11         | -0.05          | -0.15        | -0.06          | -0.27                         |
| Constant                          | 1.45            | 0.88      | 0.82             | 0.15          | 0.12           | -1.80        | 0.99           | 0.50                          |

Table 8: Parameter estimates for latent model: conditional means and thresholds. Sample is respondents age 25-30 in 2005-2011 PSID waves

|                               | Education level | Partnered | Partnership type | Weight status | Smoking status | Hypertension | In labor force | Number of biological children |
|-------------------------------|-----------------|-----------|------------------|---------------|----------------|--------------|----------------|-------------------------------|
| Education level               | 1.000           |           |                  |               |                |              |                |                               |
| Partnered                     | -0.207          | 1.000     |                  |               |                |              |                |                               |
| Partnership type              | 0.562           | 0.000     | 1.000            |               |                |              |                |                               |
| Weight status                 | 0.134           | -0.028    | 0.112            | 1.000         |                |              |                |                               |
| Smoking status                | 0.003           | -0.126    | -0.181           | -0.021        | 1.000          |              |                |                               |
| Hypertension                  | 0.014           | -0.078    | 0.052            | 0.313         | 0.013          | 1.000        |                |                               |
| In labor force                | 0.020           | -0.147    | -0.032           | -0.019        | -0.002         | -0.004       | 1.000          |                               |
| Number of biological children | -0.360          | 0.378     | 0.076            | -0.003        | -0.005         | 0.021        | -0.180         | 1.000                         |

Table 9: Parameter estimates for latent model: parameterized covariance matrix. Sample is respondents age 25-30 in 2005-2011 PSID waves

| Year | Hypertension | Overweight | Obese 1 | Obese 2 | Obese 3 | Never Smoked | Former Smoker | Current Smoker |
|------|--------------|------------|---------|---------|---------|--------------|---------------|----------------|
| 2009 | 1.00         | 1.00       | 1.00    | 1.00    | 1.00    | 1.00         | 1.00          | 1.00           |
| 2010 | 1.00         | 1.00       | 1.03    | 1.01    | 1.01    | 1.00         | 1.00          | 0.99           |
| 2011 | 0.99         | 1.00       | 1.06    | 1.01    | 1.03    | 1.01         | 0.99          | 0.98           |
| 2012 | 0.99         | 1.00       | 1.08    | 1.01    | 1.04    | 1.01         | 0.99          | 0.98           |
| 2013 | 1.00         | 1.00       | 1.10    | 1.02    | 1.06    | 1.01         | 0.99          | 0.97           |
| 2014 | 1.00         | 1.01       | 1.12    | 1.02    | 1.07    | 1.02         | 0.98          | 0.96           |
| 2015 | 1.00         | 1.00       | 1.14    | 1.03    | 1.08    | 1.02         | 0.98          | 0.95           |
| 2016 | 1.01         | 1.02       | 1.17    | 1.03    | 1.10    | 1.03         | 0.98          | 0.94           |
| 2017 | 1.01         | 1.03       | 1.19    | 1.04    | 1.11    | 1.03         | 0.97          | 0.94           |
| 2018 | 0.98         | 1.09       | 1.20    | 1.05    | 1.13    | 1.03         | 0.97          | 0.93           |
| 2019 | 0.98         | 1.09       | 1.23    | 1.06    | 1.14    | 1.04         | 0.97          | 0.92           |
| 2020 | 0.99         | 1.09       | 1.24    | 1.08    | 1.16    | 1.04         | 0.96          | 0.91           |
| 2021 | 0.99         | 1.09       | 1.26    | 1.09    | 1.17    | 1.04         | 0.96          | 0.91           |
| 2022 | 0.98         | 1.09       | 1.28    | 1.11    | 1.19    | 1.05         | 0.95          | 0.90           |
| 2023 | 0.98         | 1.09       | 1.29    | 1.13    | 1.20    | 1.05         | 0.95          | 0.89           |
| 2024 | 0.98         | 1.08       | 1.30    | 1.15    | 1.22    | 1.05         | 0.95          | 0.88           |
| 2025 | 0.98         | 1.07       | 1.31    | 1.18    | 1.24    | 1.06         | 0.94          | 0.87           |
| 2026 | 0.99         | 1.06       | 1.32    | 1.21    | 1.25    | 1.06         | 0.94          | 0.87           |
| 2027 | 0.99         | 1.04       | 1.34    | 1.24    | 1.27    | 1.06         | 0.94          | 0.86           |
| 2028 | 0.99         | 0.98       | 1.43    | 1.25    | 1.28    | 1.07         | 0.93          | 0.85           |
| 2029 | 1.01         | 0.97       | 1.46    | 1.26    | 1.30    | 1.07         | 0.93          | 0.84           |
| 2030 | 1.01         | 0.97       | 1.46    | 1.26    | 1.30    | 1.07         | 0.93          | 0.84           |
| 2031 | 1.01         | 0.97       | 1.46    | 1.26    | 1.30    | 1.07         | 0.93          | 0.84           |
| 2032 | 1.01         | 0.97       | 1.46    | 1.26    | 1.30    | 1.07         | 0.93          | 0.84           |
| 2033 | 1.01         | 0.97       | 1.46    | 1.26    | 1.30    | 1.07         | 0.93          | 0.84           |
| 2034 | 1.01         | 0.97       | 1.46    | 1.26    | 1.30    | 1.07         | 0.93          | 0.84           |
| 2035 | 1.01         | 0.97       | 1.46    | 1.26    | 1.30    | 1.07         | 0.93          | 0.84           |

Table 10: Health and risk factor trends for replenishing cohorts, prevalences relative to 2009

| Year | Less than HS | HS Grad | College Grad | Graduate School |
|------|--------------|---------|--------------|-----------------|
| 2009 | 1.00         | 1.00    | 1.00         | 1.00            |
| 2010 | 0.98         | 0.99    | 1.02         | 1.04            |
| 2011 | 0.96         | 0.99    | 1.04         | 1.08            |
| 2012 | 0.95         | 0.98    | 1.05         | 1.12            |
| 2013 | 0.93         | 0.97    | 1.07         | 1.16            |
| 2014 | 0.91         | 0.96    | 1.09         | 1.20            |
| 2015 | 0.89         | 0.96    | 1.11         | 1.25            |
| 2016 | 0.87         | 0.95    | 1.13         | 1.29            |
| 2017 | 0.86         | 0.94    | 1.14         | 1.34            |
| 2018 | 0.84         | 0.93    | 1.16         | 1.39            |
| 2019 | 0.82         | 0.93    | 1.18         | 1.44            |
| 2020 | 0.81         | 0.92    | 1.20         | 1.49            |
| 2021 | 0.79         | 0.91    | 1.21         | 1.54            |
| 2022 | 0.77         | 0.90    | 1.23         | 1.59            |
| 2023 | 0.76         | 0.89    | 1.25         | 1.65            |
| 2024 | 0.74         | 0.88    | 1.27         | 1.70            |
| 2025 | 0.73         | 0.87    | 1.28         | 1.76            |
| 2026 | 0.71         | 0.87    | 1.30         | 1.82            |
| 2027 | 0.69         | 0.86    | 1.32         | 1.88            |
| 2028 | 0.68         | 0.85    | 1.33         | 1.94            |
| 2029 | 0.66         | 0.84    | 1.35         | 2.00            |
| 2030 | 0.66         | 0.84    | 1.35         | 2.00            |
| 2031 | 0.66         | 0.84    | 1.35         | 2.00            |
| 2032 | 0.66         | 0.84    | 1.35         | 2.00            |
| 2033 | 0.66         | 0.84    | 1.35         | 2.00            |
| 2034 | 0.66         | 0.84    | 1.35         | 2.00            |
| 2035 | 0.66         | 0.84    | 1.35         | 2.00            |

Table 11: Education trends for replenishing cohorts, prevalences relative to 2009

| Year | No Children | One Child | Two Children | Three Children | Four or More Children | Partnered | Married |
|------|-------------|-----------|--------------|----------------|-----------------------|-----------|---------|
| 2009 | 1.00        | 1.00      | 1.00         | 1.00           | 1.00                  | 1.00      | 1.00    |
| 2010 | 1.01        | 1.00      | 0.99         | 0.98           | 0.98                  | 1.00      | 0.98    |
| 2011 | 1.01        | 0.99      | 0.98         | 0.97           | 0.95                  | 0.99      | 0.96    |
| 2012 | 1.02        | 0.99      | 0.97         | 0.95           | 0.93                  | 0.99      | 0.94    |
| 2013 | 1.03        | 0.98      | 0.96         | 0.93           | 0.90                  | 0.99      | 0.91    |
| 2014 | 1.03        | 0.98      | 0.95         | 0.91           | 0.88                  | 0.99      | 0.89    |
| 2015 | 1.04        | 0.97      | 0.94         | 0.90           | 0.86                  | 0.98      | 0.87    |
| 2016 | 1.05        | 0.97      | 0.92         | 0.88           | 0.84                  | 0.98      | 0.85    |
| 2017 | 1.05        | 0.96      | 0.91         | 0.87           | 0.82                  | 0.98      | 0.82    |
| 2018 | 1.06        | 0.95      | 0.90         | 0.85           | 0.79                  | 0.98      | 0.80    |
| 2019 | 1.07        | 0.95      | 0.89         | 0.83           | 0.77                  | 0.98      | 0.78    |
| 2020 | 1.07        | 0.94      | 0.88         | 0.82           | 0.75                  | 0.98      | 0.76    |
| 2021 | 1.08        | 0.94      | 0.87         | 0.80           | 0.73                  | 0.98      | 0.73    |
| 2022 | 1.09        | 0.93      | 0.86         | 0.79           | 0.72                  | 0.97      | 0.71    |
| 2023 | 1.09        | 0.93      | 0.85         | 0.77           | 0.70                  | 0.97      | 0.69    |
| 2024 | 1.10        | 0.92      | 0.84         | 0.76           | 0.68                  | 0.97      | 0.66    |
| 2025 | 1.11        | 0.92      | 0.83         | 0.75           | 0.66                  | 0.97      | 0.64    |
| 2026 | 1.11        | 0.91      | 0.82         | 0.73           | 0.64                  | 0.98      | 0.62    |
| 2027 | 1.12        | 0.90      | 0.81         | 0.72           | 0.63                  | 0.98      | 0.60    |
| 2028 | 1.13        | 0.90      | 0.80         | 0.70           | 0.61                  | 0.98      | 0.57    |
| 2029 | 1.13        | 0.89      | 0.79         | 0.69           | 0.59                  | 0.98      | 0.55    |
| 2030 | 1.13        | 0.89      | 0.79         | 0.69           | 0.59                  | 0.98      | 0.55    |
| 2031 | 1.13        | 0.89      | 0.79         | 0.69           | 0.59                  | 0.98      | 0.55    |
| 2032 | 1.13        | 0.89      | 0.79         | 0.69           | 0.59                  | 0.98      | 0.55    |
| 2033 | 1.13        | 0.89      | 0.79         | 0.69           | 0.59                  | 0.98      | 0.55    |
| 2034 | 1.13        | 0.89      | 0.79         | 0.69           | 0.59                  | 0.98      | 0.55    |
| 2035 | 1.13        | 0.89      | 0.79         | 0.69           | 0.59                  | 0.98      | 0.55    |

Table 12: Social trends for replenishing cohorts, prevalences relative to 2009

| Outcome | 2001        |              |          | 2007        |              |          | 2013        |              |          |
|---------|-------------|--------------|----------|-------------|--------------|----------|-------------|--------------|----------|
|         | FAM<br>mean | PSID<br>mean | <i>p</i> | FAM<br>mean | PSID<br>mean | <i>p</i> | FAM<br>mean | PSID<br>mean | <i>p</i> |
| Died    | 0.014       | 0.018        | 0.011    | 0.020       | 0.023        | 0.222    | 0.025       | 0.026        | 0.671    |

Table 13: Data-splitting validation of 1999 cohort: Mortality in 2001, 2007, and 2013

| Outcome         | 2001        |              |          | 2007        |              |          | 2013        |              |          |
|-----------------|-------------|--------------|----------|-------------|--------------|----------|-------------|--------------|----------|
|                 | FAM<br>mean | PSID<br>mean | <i>p</i> | FAM<br>mean | PSID<br>mean | <i>p</i> | FAM<br>mean | PSID<br>mean | <i>p</i> |
| Age on July 1st | 49.185      | 49.022       | 0.467    | 53.347      | 53.379       | 0.887    | 57.150      | 57.960       | 0.000    |
| Black           | 0.100       | 0.093        | 0.104    | 0.099       | 0.088        | 0.011    | 0.099       | 0.092        | 0.173    |
| Hispanic        | 0.078       | 0.078        | 0.994    | 0.083       | 0.085        | 0.553    | 0.089       | 0.095        | 0.250    |
| Male            | 0.456       | 0.460        | 0.543    | 0.454       | 0.463        | 0.246    | 0.452       | 0.458        | 0.501    |

Table 14: Data-splitting validation of 1999 cohort: Demographic outcomes in 2001, 2007, and 2013

| Outcome       | 2001        |              |          | 2007        |              |          | 2013        |              |          |
|---------------|-------------|--------------|----------|-------------|--------------|----------|-------------|--------------|----------|
|               | FAM<br>mean | PSID<br>mean | <i>p</i> | FAM<br>mean | PSID<br>mean | <i>p</i> | FAM<br>mean | PSID<br>mean | <i>p</i> |
| Any ADLs      | 0.081       | 0.064        | 0.000    | 0.110       | 0.126        | 0.001    | 0.134       | 0.142        | 0.177    |
| Any IADLs     | 0.103       | 0.113        | 0.021    | 0.115       | 0.130        | 0.005    | 0.137       | 0.170        | 0.000    |
| Cancer        | 0.037       | 0.035        | 0.369    | 0.064       | 0.054        | 0.004    | 0.092       | 0.077        | 0.002    |
| Diabetes      | 0.067       | 0.062        | 0.136    | 0.099       | 0.090        | 0.042    | 0.134       | 0.127        | 0.198    |
| Heart Disease | 0.102       | 0.106        | 0.365    | 0.134       | 0.152        | 0.001    | 0.167       | 0.173        | 0.356    |
| Hypertension  | 0.180       | 0.169        | 0.051    | 0.274       | 0.257        | 0.012    | 0.364       | 0.344        | 0.010    |
| Lung Disease  | 0.038       | 0.039        | 0.641    | 0.061       | 0.058        | 0.293    | 0.083       | 0.091        | 0.112    |
| Stroke        | 0.021       | 0.020        | 0.482    | 0.029       | 0.032        | 0.399    | 0.039       | 0.037        | 0.466    |

Table 15: Data-splitting validation of 1999 cohort: Binary health outcomes in 2001, 2007, and 2013

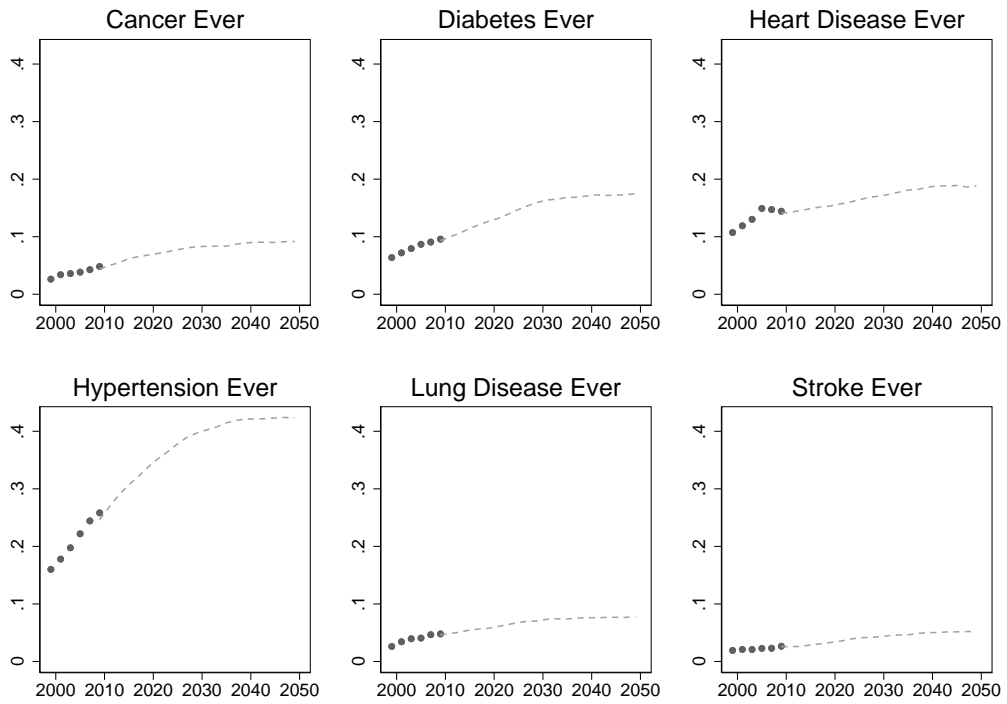

Figure 2: Historic and Forecasted Chronic Disease Prevalence for Men 25+

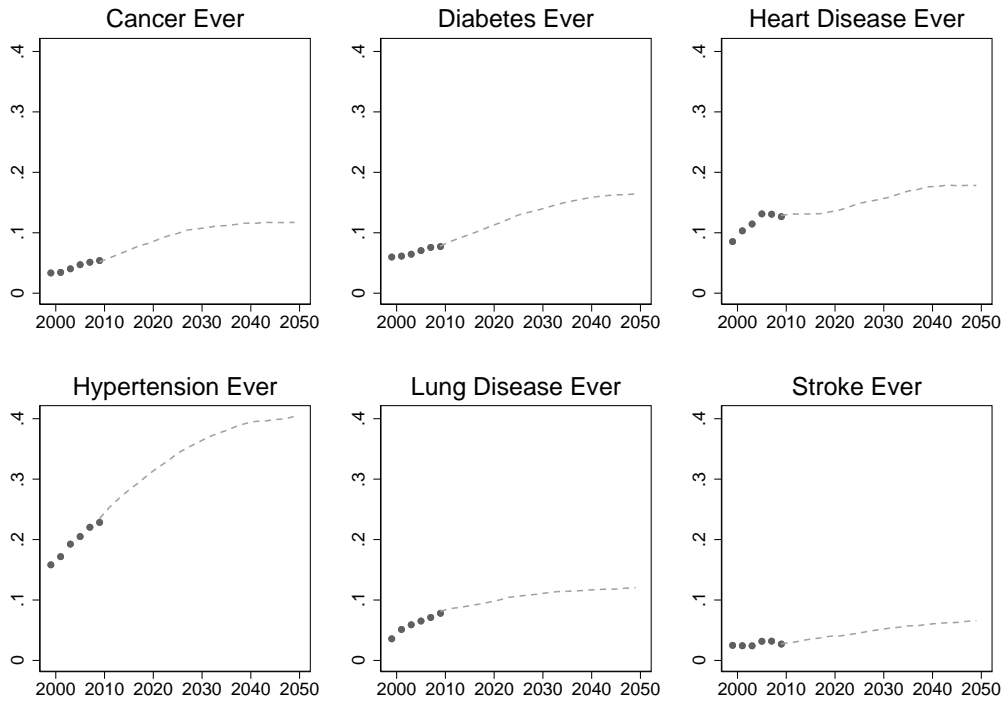

Figure 3: Historic and Forecasted Chronic Disease Prevalence for Women 25+



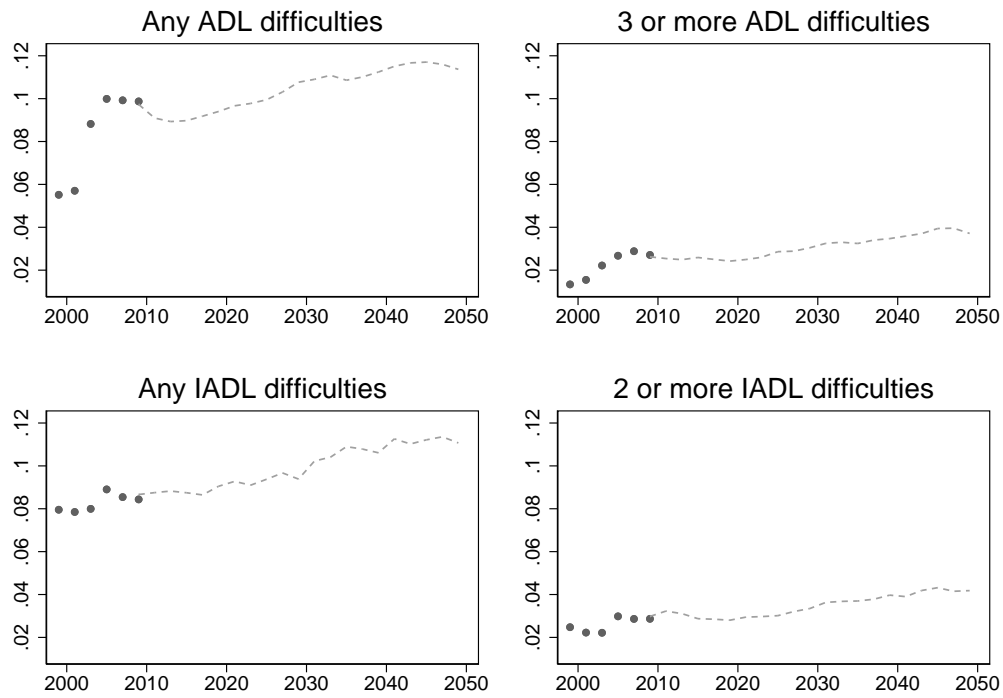

Figure 4: Historic and Forecasted ADL and IADL Prevalence for Men 25+

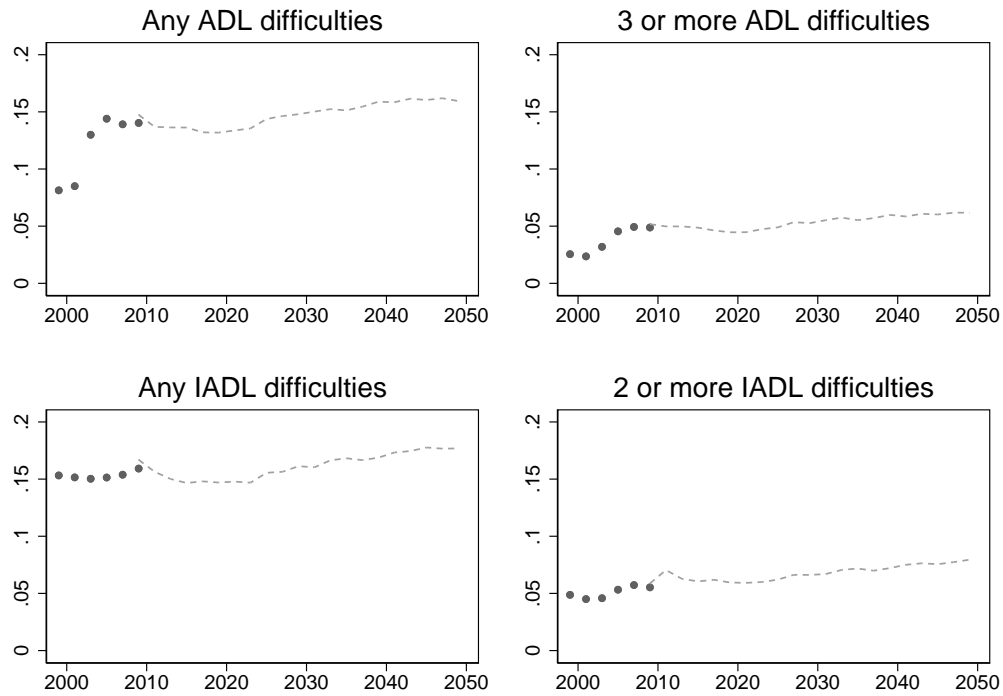

Figure 5: Historic and Forecasted ADL and IADL Prevalence for Women 25+

| Outcome        | 2001        |              |          | 2007        |              |          | 2013        |              |          |
|----------------|-------------|--------------|----------|-------------|--------------|----------|-------------|--------------|----------|
|                | FAM<br>mean | PSID<br>mean | <i>p</i> | FAM<br>mean | PSID<br>mean | <i>p</i> | FAM<br>mean | PSID<br>mean | <i>p</i> |
| BMI            | 26.820      | 26.757       | 0.407    | 27.511      | 27.440       | 0.423    | 27.959      | 27.742       | 0.033    |
| Current smoker | 0.187       | 0.200        | 0.018    | 0.157       | 0.167        | 0.084    | 0.133       | 0.146        | 0.033    |
| Ever smoked    | 0.474       | 0.513        | 0.000    | 0.470       | 0.525        | 0.000    | 0.462       | 0.531        | 0.000    |

Table 16: Data-splitting validation of 1999 cohort: Risk factor outcomes in 2001, 2007, and 2013

| Outcome         | 2001        |              |          | 2007        |              |          | 2013        |              |          |
|-----------------|-------------|--------------|----------|-------------|--------------|----------|-------------|--------------|----------|
|                 | FAM<br>mean | PSID<br>mean | <i>p</i> | FAM<br>mean | PSID<br>mean | <i>p</i> | FAM<br>mean | PSID<br>mean | <i>p</i> |
| Claiming SSDI   | 0.017       | 0.023        | 0.004    | 0.020       | 0.033        | 0.000    | 0.027       | 0.049        | 0.000    |
| Claiming OASI   | 0.190       | 0.192        | 0.723    | 0.217       | 0.218        | 0.887    | 0.279       | 0.284        | 0.552    |
| Claiming SSI    | 0.017       | 0.016        | 0.409    | 0.015       | 0.016        | 0.439    | 0.015       | 0.017        | 0.289    |
| Working for pay | 0.651       | 0.683        | 0.000    | 0.625       | 0.657        | 0.000    | 0.595       | 0.598        | 0.660    |

Table 17: Data-splitting validation of 1999 cohort: Binary economic outcomes in 2001, 2007, and 2013

| Year | Census 25+ | FAM Minimal 25+ | Census 65+ | FAM Minimal 65+ |
|------|------------|-----------------|------------|-----------------|
| 2009 | 202.1      | 202.0           | 39.6       | 39.4            |
| 2011 | 206.6      | 206.3           | 41.4       | 40.8            |
| 2013 | 211.0      | 210.1           | 44.7       | 43.7            |
| 2015 | 215.9      | 214.7           | 47.7       | 46.8            |
| 2017 | 220.9      | 219.3           | 50.8       | 49.8            |
| 2019 | 225.5      | 223.9           | 54.2       | 52.4            |
| 2021 | 229.8      | 228.1           | 57.7       | 55.8            |
| 2023 | 233.9      | 231.7           | 61.4       | 58.1            |
| 2025 | 238.0      | 235.9           | 65.1       | 62.0            |
| 2027 | 241.9      | 239.7           | 68.4       | 65.5            |
| 2029 | 245.7      | 243.6           | 71.4       | 69.1            |
| 2031 | 249.3      | 247.4           | 73.8       | 72.1            |
| 2033 | 252.9      | 250.9           | 75.5       | 73.6            |
| 2035 | 256.0      | 254.1           | 77.3       | 76.1            |
| 2037 | 259.2      | 257.1           | 78.8       | 76.8            |
| 2039 | 262.6      | 260.3           | 79.4       | 77.5            |
| 2041 | 265.8      | 263.8           | 79.9       | 77.7            |
| 2043 | 269.0      | 266.7           | 80.4       | 78.7            |
| 2045 | 272.2      | 270.0           | 81.3       | 80.0            |
| 2047 | 275.3      | 273.1           | 82.2       | 81.1            |
| 2049 | 278.4      | 275.7           | 83.2       | 81.4            |

Table 18: Population forecasts: Census compared to FAM

## References

- Atherly, A., Dowd, B. E., and Feldman, R. (2004). The effect of benefits, premiums, and health risk on health plan choice in the medicare program. *Health services research*, 39(4p1):847–864.
- Buchmueller, T. (2006). Price and the health plan choices of retirees. *Journal of Health Economics*, 25(1):81–101.
- Goldman, D. P., Shekelle, P. G., Bhattacharya, J., Hurd, M., and Joyce, G. F. (2004). Health status and medical treatment of the future elderly. Technical report, DTIC Document.
- MacKinnon, J. G. and Magee, L. (1990). Transforming the dependent variable in regression models. *International Economic Review*, pages 315–339.
- Roodman, D. (2011). Fitting fully observed recursive mixed-process models with `cmp`. *Stata Journal*, 11(2):159–206(48).
- Smith, K. and Favreault, M. (2013). A primer on modeling income in the near term, version 7. Technical report, The Urban Institute.

This file provides supplementary details for the paper:

**Title:** Measuring the COVID-19 Mortality Burden in the United States: A Microsimulation Study

**Authors:** Julian Reif, Hanke Heun-Johnson, Bryan Tysinger, and Darius Lakdawalla

The following sheets contain transition model estimates for relevant variables in the Future Adult Model, for the population ages 25-54 years in 2020.

**Binaries**

This worksheet reports estimates of the probability of developing a chronic condition (stroke, heart disease, cancer, hypertension, diabetes, and lung disease), of exercise status, of initiating smoking, and of ceasing smoking.

**Ordered probits**

This worksheet reports estimates of the probability of changing ADL and IADL status.

**OLS**

This worksheet reports estimates of how BMI is updated in the microsimulation.

**Mortality & nursing home**

This worksheet reports estimates of the probability of dying, of one's partner dying, and of living in nursing home (ages 55+ only).

These models are estimated on a combined sample of PSID and HRS respondents.

|                                             | Stroke (stroke) coefficients |         | Stroke (stroke) marginal effects |         | Heart disease (hearte) coefficients |         | Heart disease (hearte) marginal effects |         | Any exercise (anyexercise) coefficients |         | Any exercise (anyexercise) marginal effects |         | Cancer (cancre) coefficients |         | Cancer (cancre) marginal effects |         |
|---------------------------------------------|------------------------------|---------|----------------------------------|---------|-------------------------------------|---------|-----------------------------------------|---------|-----------------------------------------|---------|---------------------------------------------|---------|------------------------------|---------|----------------------------------|---------|
|                                             | coef                         | p-value | coef                             | p-value | coef                                | p-value | coef                                    | p-value | coef                                    | p-value | coef                                        | p-value | coef                         | p-value | coef                             | p-value |
| Non-hispanic black                          | 0.136***                     | 0.050   | 0.001                            |         | -0.011                              | 0.040   | -0.000                                  |         | -0.345***                               | 0.018   | -0.076                                      |         | -0.186***                    | 0.048   | -0.003                           |         |
| Hispanic                                    | -0.015                       | 0.099   | -0.000                           |         | -0.198**                            | 0.093   | -0.005                                  |         | -0.231***                               | 0.033   | -0.052                                      |         | -0.352***                    | 0.117   | -0.005                           |         |
| Less than HS/GED                            | 0.134***                     | 0.042   | 0.001                            |         | 0.187***                            | 0.044   | 0.006                                   |         | -0.315***                               | 0.023   | -0.072                                      |         | -0.058                       | 0.053   | -0.001                           |         |
| College                                     | -0.108**                     | 0.054   | -0.001                           |         | -0.080**                            | 0.038   | -0.002                                  |         | 0.324***                                | 0.020   | 0.058                                       |         | 0.072*                       | 0.037   | 0.001                            |         |
| Beyond college                              | -0.225***                    | 0.085   | -0.001                           |         | -0.063                              | 0.052   | -0.002                                  |         | 0.411***                                | 0.030   | 0.067                                       |         | 0.017                        | 0.051   | 0.000                            |         |
| Male                                        | -0.479                       | 1.025   | -0.004                           |         | -0.145                              | 0.556   | -0.004                                  |         | 0.074***                                | 0.026   | 0.015                                       |         | -0.203                       | 0.884   | -0.004                           |         |
| Black male                                  | 0.098                        | 0.074   | 0.001                            |         | -0.085                              | 0.053   | -0.002                                  |         | 0.030                                   | 0.025   | 0.006                                       |         | -0.007                       | 0.068   | -0.000                           |         |
| Hispanic male                               | -0.230                       | 0.167   | -0.001                           |         | -0.096                              | 0.099   | -0.002                                  |         | -0.049                                  | 0.038   | -0.010                                      |         | 0.017                        | 0.126   | 0.000                            |         |
| Poor as a child                             | 0.012                        | 0.038   | 0.000                            |         | 0.044*                              | 0.026   | 0.001                                   |         | -0.007                                  | 0.012   | -0.001                                      |         | 0.052*                       | 0.029   | 0.001                            |         |
| Wealthy as a child                          | 0.109**                      | 0.049   | 0.001                            |         | 0.041                               | 0.033   | 0.001                                   |         | -0.083***                               | 0.015   | -0.017                                      |         | 0.011                        | 0.038   | 0.000                            |         |
| Childhood health - fair                     | -0.046                       | 0.146   | -0.000                           |         | -0.189*                             | 0.106   | -0.004                                  |         | 0.126**                                 | 0.055   | 0.024                                       |         | -0.058                       | 0.131   | -0.001                           |         |
| Childhood health - good                     | -0.137                       | 0.129   | -0.001                           |         | -0.239***                           | 0.092   | -0.006                                  |         | 0.136***                                | 0.048   | 0.026                                       |         | -0.072                       | 0.115   | -0.001                           |         |
| Childhood health - very good                | -0.167                       | 0.126   | -0.001                           |         | -0.355***                           | 0.090   | -0.008                                  |         | 0.231***                                | 0.048   | 0.044                                       |         | -0.134                       | 0.113   | -0.002                           |         |
| Childhood health - excellent                | -0.200                       | 0.124   | -0.002                           |         | -0.350***                           | 0.088   | -0.011                                  |         | 0.258***                                | 0.047   | 0.053                                       |         | -0.097                       | 0.111   | -0.002                           |         |
| Age spline, less than 35                    | 0.004                        | 0.021   | 0.000                            |         | 0.008                               | 0.012   | 0.000                                   |         | -0.007**                                | 0.003   | -0.001                                      |         | 0.012                        | 0.014   | 0.000                            |         |
| Age spline, 35 to 44                        | 0.027**                      | 0.014   | 0.000                            |         | 0.025***                            | 0.008   | 0.001                                   |         | -0.017***                               | 0.003   | -0.004                                      |         | 0.018**                      | 0.009   | 0.000                            |         |
| Age spline, 45 to 54                        | 0.006                        | 0.011   | 0.000                            |         | 0.000                               | 0.007   | 0.000                                   |         | -0.011***                               | 0.002   | -0.002                                      |         | 0.027***                     | 0.008   | 0.000                            |         |
| Age spline, 55 to 64                        | 0.024**                      | 0.010   | 0.000                            |         | 0.016**                             | 0.008   | 0.000                                   |         | -0.012***                               | 0.003   | -0.002                                      |         | 0.015**                      | 0.008   | 0.000                            |         |
| Age spline, 65 to 74                        | 0.006                        | 0.011   | 0.000                            |         | 0.025***                            | 0.009   | 0.001                                   |         | -0.016***                               | 0.003   | -0.003                                      |         | 0.015*                       | 0.009   | 0.000                            |         |
| Age spline, more than 75                    | 0.031***                     | 0.008   | 0.000                            |         | 0.032***                            | 0.007   | 0.001                                   |         | -0.034***                               | 0.003   | -0.007                                      |         | 0.010                        | 0.007   | 0.000                            |         |
| Male, age spline less than 35               | 0.014                        | 0.034   | 0.000                            |         | 0.004                               | 0.019   | 0.000                                   |         |                                         |         |                                             |         | -0.008                       | 0.030   | -0.000                           |         |
| Male, age spline 35 to 44                   | -0.008                       | 0.021   | -0.000                           |         | 0.002                               | 0.012   | 0.000                                   |         |                                         |         |                                             |         | 0.020                        | 0.018   | 0.000                            |         |
| Male, age spline 45 to 54                   | 0.018                        | 0.016   | 0.000                            |         | 0.026***                            | 0.010   | 0.001                                   |         |                                         |         |                                             |         | 0.017                        | 0.013   | 0.000                            |         |
| Male, age spline 55 to 64                   | -0.004                       | 0.015   | -0.000                           |         | -0.004                              | 0.011   | -0.000                                  |         |                                         |         |                                             |         | 0.022**                      | 0.011   | 0.000                            |         |
| Male, age spline 65 to 74                   | 0.003                        | 0.016   | 0.000                            |         | -0.006                              | 0.012   | -0.000                                  |         |                                         |         |                                             |         | -0.004                       | 0.012   | -0.000                           |         |
| Male, age spline over 75                    | -0.010                       | 0.013   | -0.000                           |         | -0.011                              | 0.011   | -0.000                                  |         |                                         |         |                                             |         | 0.013                        | 0.011   | 0.000                            |         |
| Lag of Doctor ever - heart disease          | 0.295***                     | 0.041   | 0.003                            |         |                                     |         |                                         |         |                                         |         |                                             |         |                              |         |                                  |         |
| Lag of Doctor ever - cancer                 | 0.102                        | 0.070   | 0.001                            |         |                                     |         |                                         |         |                                         |         |                                             |         |                              |         |                                  |         |
| Lag of Doctor ever - hypertension           | 0.305***                     | 0.038   | 0.003                            |         | 0.309***                            | 0.027   | 0.011                                   |         |                                         |         |                                             |         |                              |         |                                  |         |
| Lag of Doctor ever - diabetes               | 0.173***                     | 0.047   | 0.002                            |         | 0.167***                            | 0.037   | 0.006                                   |         |                                         |         |                                             |         |                              |         |                                  |         |
| Lag of Ever smoked cigarettes               | 0.094**                      | 0.040   | 0.001                            |         | 0.085***                            | 0.027   | 0.002                                   |         |                                         |         |                                             |         | 0.052*                       | 0.030   | 0.001                            |         |
| Lag of Current smoker                       | 0.181***                     | 0.046   | 0.002                            |         | 0.175***                            | 0.032   | 0.006                                   |         |                                         |         |                                             |         | 0.133***                     | 0.038   | 0.003                            |         |
| Lag of Any light or heavy physical activity | -0.158***                    | 0.039   | -0.001                           |         | -0.062**                            | 0.030   | -0.002                                  |         | 0.969***                                | 0.013   | 0.273                                       |         | 0.034                        | 0.036   | 0.001                            |         |
| Log(BMI) spline, BMI < 30                   | -0.401***                    | 0.141   | -0.003                           |         | -0.028                              | 0.101   | -0.001                                  |         |                                         |         |                                             |         | -0.052                       | 0.108   | -0.001                           |         |
| Log(BMI) spline, BMI > 30                   | 0.315*                       | 0.166   | 0.003                            |         | 0.898***                            | 0.111   | 0.025                                   |         |                                         |         |                                             |         | 0.515***                     | 0.136   | 0.009                            |         |
| Black, Less than HS                         |                              |         |                                  |         | -0.055                              | 0.065   | -0.001                                  |         | 0.122***                                | 0.032   | 0.023                                       |         | 0.039                        | 0.085   | 0.001                            |         |
| Black, College                              |                              |         |                                  |         | -0.018                              | 0.088   | -0.001                                  |         | -0.020                                  | 0.039   | -0.004                                      |         | -0.033                       | 0.102   | -0.001                           |         |
| Black, Beyond College                       |                              |         |                                  |         | -0.199                              | 0.155   | -0.004                                  |         | 0.041                                   | 0.066   | 0.008                                       |         | 0.017                        | 0.156   | 0.000                            |         |
| Hispanic, Less than HS                      |                              |         |                                  |         | -0.116                              | 0.114   | -0.003                                  |         | 0.014                                   | 0.043   | 0.003                                       |         | 0.088                        | 0.150   | 0.002                            |         |
| Hispanic, College                           |                              |         |                                  |         | 0.249                               | 0.165   | 0.009                                   |         | -0.119*                                 | 0.069   | -0.026                                      |         | 0.287                        | 0.180   | 0.007                            |         |
| Hispanic, Beyond College                    |                              |         |                                  |         | 0.392**                             | 0.195   | 0.017                                   |         | 0.142                                   | 0.109   | 0.026                                       |         | 0.208                        | 0.246   | 0.005                            |         |
| Lag of married from marriage history        |                              |         |                                  |         |                                     |         |                                         |         | 0.105***                                | 0.016   | 0.022                                       |         |                              |         |                                  |         |
| Lag of cohab                                |                              |         |                                  |         |                                     |         |                                         |         | 0.020                                   | 0.030   | 0.004                                       |         |                              |         |                                  |         |
| Male, previously married                    |                              |         |                                  |         |                                     |         |                                         |         | 0.006                                   | 0.027   | 0.001                                       |         |                              |         |                                  |         |
| Male, previously cohabitating               |                              |         |                                  |         |                                     |         |                                         |         | 0.038                                   | 0.045   | 0.007                                       |         |                              |         |                                  |         |
| Lag of Doctor ever - chronic lung disease   |                              |         |                                  |         |                                     |         |                                         |         |                                         |         |                                             |         |                              |         |                                  |         |
| _cons                                       | -1.790**                     | 0.767   |                                  |         | -2.474***                           | 0.478   |                                         |         | 0.499***                                | 0.112   |                                             |         | -2.844***                    | 0.541   |                                  |         |

note: .01 - \*\*\*; .05 - \*\*; .1 - \*;

|                                             | Hypertension (hibpe) coefficients |         | Hypertension (hibpe) marginal effects |         | Diabetes (diabe) coefficients |         | Diabetes (diabe) marginal effects |         | Lung disease (lunge) coefficients |         | Lung disease (lunge) marginal effects |         | Start smoking (smoke_start) coefficients |         | Start smoking (smoke_start) marginal effects |         |
|---------------------------------------------|-----------------------------------|---------|---------------------------------------|---------|-------------------------------|---------|-----------------------------------|---------|-----------------------------------|---------|---------------------------------------|---------|------------------------------------------|---------|----------------------------------------------|---------|
|                                             | coef                              | p-value | coef                                  | p-value | coef                          | p-value | coef                              | p-value | coef                              | p-value | coef                                  | p-value | coef                                     | p-value | coef                                         | p-value |
| Non-hispanic black                          | 0.240***                          | 0.028   | 0.022                                 |         | 0.026                         | 0.039   | 0.001                             |         | 0.016                             | 0.042   | 0.000                                 |         | 0.139***                                 | 0.036   | 0.003                                        |         |
| Hispanic                                    | 0.071                             | 0.054   | 0.006                                 |         | 0.137*                        | 0.073   | 0.004                             |         | -0.092                            | 0.094   | -0.002                                |         | -0.135**                                 | 0.069   | -0.003                                       |         |
| Less than HS/GED                            | 0.031                             | 0.036   | 0.003                                 |         | 0.130***                      | 0.047   | 0.004                             |         | 0.243***                          | 0.045   | 0.006                                 |         | 0.191***                                 | 0.048   | 0.005                                        |         |
| College                                     | -0.039                            | 0.026   | -0.003                                |         | -0.048                        | 0.040   | -0.001                            |         | -0.174***                         | 0.047   | -0.003                                |         | -0.314***                                | 0.036   | -0.006                                       |         |
| Beyond college                              | -0.098**                          | 0.038   | -0.008                                |         | -0.063                        | 0.055   | -0.001                            |         | -0.312***                         | 0.077   | -0.005                                |         | -0.597***                                | 0.070   | -0.008                                       |         |
| Male                                        | 0.307                             | 0.330   | 0.027                                 |         | -0.733                        | 0.620   | -0.018                            |         | 0.107                             | 0.531   | 0.002                                 |         | 0.507                                    | 0.323   | 0.013                                        |         |
| Black male                                  | -0.130***                         | 0.037   | -0.010                                |         | 0.101*                        | 0.052   | 0.003                             |         | 0.060                             | 0.057   | 0.001                                 |         | 0.137***                                 | 0.047   | 0.004                                        |         |
| Hispanic male                               | -0.126**                          | 0.062   | -0.010                                |         | 0.136**                       | 0.081   | 0.004                             |         | -0.167                            | 0.121   | -0.003                                |         | 0.128                                    | 0.080   | 0.003                                        |         |
| Poor as a child                             | 0.042**                           | 0.019   | 0.004                                 |         | 0.023                         | 0.026   | 0.001                             |         | 0.030                             | 0.029   | 0.001                                 |         | 0.008                                    | 0.025   | 0.000                                        |         |
| Wealthy as a child                          | 0.009                             | 0.022   | 0.001                                 |         | -0.013                        | 0.033   | -0.000                            |         | 0.046                             | 0.036   | 0.001                                 |         | 0.126***                                 | 0.028   | 0.003                                        |         |
| Childhood health - fair                     | 0.169*                            | 0.089   | 0.016                                 |         | 0.049                         | 0.117   | 0.001                             |         | -0.062                            | 0.110   | -0.001                                |         | 0.247**                                  | 0.124   | 0.007                                        |         |
| Childhood health - good                     | 0.078                             | 0.080   | 0.007                                 |         | -0.068                        | 0.105   | -0.002                            |         | -0.235**                          | 0.098   | -0.004                                |         | 0.140                                    | 0.113   | 0.004                                        |         |
| Childhood health - very good                | 0.013                             | 0.079   | 0.001                                 |         | -0.051                        | 0.103   | -0.001                            |         | -0.323***                         | 0.097   | -0.005                                |         | 0.142                                    | 0.112   | 0.003                                        |         |
| Childhood health - excellent                | -0.021                            | 0.078   | -0.002                                |         | -0.072                        | 0.102   | -0.002                            |         | -0.370***                         | 0.095   | -0.008                                |         | 0.233**                                  | 0.111   | 0.005                                        |         |
| Age spline, less than 35                    | 0.037***                          | 0.008   | 0.003                                 |         | 0.017                         | 0.012   | 0.000                             |         | 0.004                             | 0.011   | 0.000                                 |         | -0.025***                                | 0.007   | -0.001                                       |         |
| Age spline, 35 to 44                        | 0.018***                          | 0.005   | 0.001                                 |         | 0.018**                       | 0.008   | 0.000                             |         | 0.010                             | 0.008   | 0.000                                 |         | -0.010*                                  | 0.006   | -0.000                                       |         |
| Age spline, 45 to 54                        | 0.030***                          | 0.005   | 0.003                                 |         | 0.025***                      | 0.007   | 0.001                             |         | 0.020***                          | 0.007   | 0.000                                 |         | -0.026***                                | 0.007   | -0.001                                       |         |
| Age spline, 55 to 64                        | 0.010*                            | 0.006   | 0.001                                 |         | 0.007                         | 0.007   | 0.000                             |         | 0.007                             | 0.008   | 0.000                                 |         | -0.036***                                | 0.009   | -0.001                                       |         |
| Age spline, 65 to 74                        | 0.006                             | 0.008   | 0.001                                 |         | 0.005                         | 0.009   | 0.000                             |         | 0.009                             | 0.010   | 0.000                                 |         | -0.018                                   | 0.014   | -0.000                                       |         |
| Age spline, more than 75                    | 0.020***                          | 0.007   | 0.002                                 |         | 0.003                         | 0.009   | 0.000                             |         | -0.002                            | 0.009   | -0.000                                |         | -0.034*                                  | 0.018   | -0.001                                       |         |
| Male, age spline less than 35               | -0.005                            | 0.011   | -0.000                                |         | 0.017                         | 0.020   | 0.000                             |         | -0.010                            | 0.018   | -0.000                                |         | -0.018                                   | 0.011   | -0.000                                       |         |
| Male, age spline 35 to 44                   | 0.002                             | 0.007   | 0.000                                 |         | 0.028**                       | 0.012   | 0.001                             |         | 0.003                             | 0.013   | 0.000                                 |         | -0.006                                   | 0.009   | -0.000                                       |         |
| Male, age spline 45 to 54                   | -0.017**                          | 0.007   | -0.001                                |         | -0.017*                       | 0.010   | -0.000                            |         | 0.005                             | 0.012   | 0.000                                 |         | 0.008                                    | 0.010   | 0.000                                        |         |
| Male, age spline 55 to 64                   | 0.007                             | 0.008   | 0.001                                 |         | 0.022**                       | 0.010   | 0.001                             |         | 0.015                             | 0.012   | 0.000                                 |         | 0.010                                    | 0.013   | 0.000                                        |         |
| Male, age spline 65 to 74                   | -0.016                            | 0.011   | -0.001                                |         | -0.011                        | 0.013   | -0.000                            |         | 0.001                             | 0.014   | 0.000                                 |         | -0.025                                   | 0.020   | -0.001                                       |         |
| Male, age spline over 75                    | -0.008                            | 0.011   | -0.001                                |         | 0.010                         | 0.013   | 0.000                             |         | 0.016                             | 0.014   | 0.000                                 |         | 0.004                                    | 0.028   | 0.000                                        |         |
| Lag of Doctor ever - heart disease          |                                   |         |                                       |         |                               |         |                                   |         |                                   |         |                                       |         |                                          |         |                                              |         |
| Lag of Doctor ever - cancer                 |                                   |         |                                       |         |                               |         |                                   |         |                                   |         |                                       |         |                                          |         |                                              |         |
| Lag of Doctor ever - hypertension           |                                   |         |                                       |         |                               |         |                                   |         |                                   |         |                                       |         |                                          |         |                                              |         |
| Lag of Doctor ever - diabetes               | 0.202***                          | 0.035   | 0.020                                 |         |                               |         |                                   |         |                                   |         |                                       |         |                                          |         |                                              |         |
| Lag of Ever smoked cigarettes               | 0.058***                          | 0.019   | 0.005                                 |         | 0.058**                       | 0.026   | 0.001                             |         | 0.269***                          | 0.032   | 0.006                                 |         | 1.419***                                 | 0.030   | 0.066                                        |         |
| Lag of Current smoker                       | 0.049**                           | 0.024   | 0.004                                 |         | 0.037                         | 0.034   | 0.001                             |         | 0.245***                          | 0.033   | 0.006                                 |         |                                          |         |                                              |         |
| Lag of Any light or heavy physical activity | -0.059***                         | 0.023   | -0.005                                |         | -0.082***                     | 0.030   | -0.002                            |         | -0.101***                         | 0.032   | -0.002                                |         | -0.157***                                | 0.030   | -0.004                                       |         |
| Log(BMI) spline, BMI < 30                   | 0.994***                          | 0.074   | 0.084                                 |         | 1.719***                      | 0.124   | 0.043                             |         | -0.003                            | 0.107   | -0.000                                |         | -0.233**                                 | 0.091   | -0.005                                       |         |
| Log(BMI) spline, BMI > 30                   | 0.811***                          | 0.087   | 0.068                                 |         | 1.230***                      | 0.098   | 0.031                             |         | 0.948***                          | 0.118   | 0.019                                 |         | -0.200*                                  | 0.118   | -0.004                                       |         |
| Black, Less than HS                         | -0.034                            | 0.052   | -0.003                                |         | -0.092                        | 0.068   | -0.002                            |         | -0.154**                          | 0.068   | -0.003                                |         | -0.060                                   | 0.067   | -0.001                                       |         |
| Black, College                              | 0.079                             | 0.054   | 0.007                                 |         | 0.047                         | 0.079   | 0.001                             |         | 0.223**                           | 0.091   | 0.006                                 |         | 0.200**                                  | 0.080   | 0.006                                        |         |
| Black, Beyond College                       | 0.137                             | 0.084   | 0.013                                 |         | 0.005                         | 0.126   | 0.000                             |         | 0.312**                           | 0.156   | 0.009                                 |         | 0.516***                                 | 0.136   | 0.021                                        |         |
| Hispanic, Less than HS                      | -0.158**                          | 0.072   | -0.012                                |         | -0.139                        | 0.091   | -0.003                            |         | -0.265**                          | 0.127   | -0.004                                |         | -0.150                                   | 0.093   | -0.003                                       |         |
| Hispanic, College                           | -0.075                            | 0.107   | -0.006                                |         | -0.128                        | 0.151   | -0.003                            |         | 0.338*                            | 0.172   | 0.010                                 |         | 0.317**                                  | 0.125   | 0.010                                        |         |
| Hispanic, Beyond College                    | -0.103                            | 0.154   | -0.008                                |         | -0.230                        | 0.238   | -0.004                            |         | -0.018                            | 0.367   | -0.000                                |         | 0.085                                    | 0.256   | 0.002                                        |         |
| Lag of married from marriage history        |                                   |         |                                       |         |                               |         |                                   |         |                                   |         |                                       |         |                                          |         |                                              |         |
| Lag of cohab                                |                                   |         |                                       |         |                               |         |                                   |         |                                   |         |                                       |         |                                          |         |                                              |         |
| Male, previously married                    |                                   |         |                                       |         |                               |         |                                   |         |                                   |         |                                       |         |                                          |         |                                              |         |
| Male, previously cohabitating               |                                   |         |                                       |         |                               |         |                                   |         |                                   |         |                                       |         |                                          |         |                                              |         |
| Lag of Doctor ever - chronic lung disease   |                                   |         |                                       |         |                               |         |                                   |         |                                   |         |                                       |         |                                          |         |                                              |         |
| _cons                                       | -6.503***                         | 0.337   |                                       |         | -8.678***                     | 0.546   |                                   |         | -2.447***                         | 0.476   |                                       |         | -1.068***                                | 0.368   |                                              |         |

note: .01 - \*\*\*, .05 - \*\*, .1 - \*;

|                                             | Stop smoking<br>(smoke_stop)<br>coefficients |         | Stop smoking<br>(smoke_stop)<br>marginal effects |         |
|---------------------------------------------|----------------------------------------------|---------|--------------------------------------------------|---------|
|                                             | coef                                         | p-value | coef                                             | p-value |
| Non-hispanic black                          | 0.037                                        | 0.037   | 0.010                                            |         |
| Hispanic                                    | 0.252***                                     | 0.084   | 0.073                                            |         |
| Less than HS/GED                            | -0.234***                                    | 0.041   | -0.058                                           |         |
| College                                     | 0.309***                                     | 0.042   | 0.090                                            |         |
| Beyond college                              | 0.387***                                     | 0.088   | 0.118                                            |         |
| Male                                        | -0.311                                       | 0.318   | -0.082                                           |         |
| Black male                                  | 0.032                                        | 0.047   | 0.009                                            |         |
| Hispanic male                               | 0.069                                        | 0.098   | 0.019                                            |         |
| Poor as a child                             | -0.040                                       | 0.026   | -0.010                                           |         |
| Wealthy as a child                          | 0.073**                                      | 0.029   | 0.019                                            |         |
| Childhood health - fair                     | 0.037                                        | 0.124   | 0.010                                            |         |
| Childhood health - good                     | -0.026                                       | 0.113   | -0.007                                           |         |
| Childhood health - very good                | -0.009                                       | 0.112   | -0.002                                           |         |
| Childhood health - excellent                | 0.043                                        | 0.111   | 0.011                                            |         |
| Age spline, less than 35                    | -0.019**                                     | 0.008   | -0.005                                           |         |
| Age spline, 35 to 44                        | -0.020***                                    | 0.006   | -0.005                                           |         |
| Age spline, 45 to 54                        | 0.021***                                     | 0.007   | 0.006                                            |         |
| Age spline, 55 to 64                        | 0.005                                        | 0.010   | 0.001                                            |         |
| Age spline, 65 to 74                        | -0.001                                       | 0.016   | -0.000                                           |         |
| Age spline, more than 75                    | 0.042*                                       | 0.025   | 0.011                                            |         |
| Male, age spline less than 35               | 0.008                                        | 0.011   | 0.002                                            |         |
| Male, age spline 35 to 44                   | 0.011                                        | 0.009   | 0.003                                            |         |
| Male, age spline 45 to 54                   | -0.031***                                    | 0.010   | -0.008                                           |         |
| Male, age spline 55 to 64                   | 0.016                                        | 0.013   | 0.004                                            |         |
| Male, age spline 65 to 74                   | 0.031                                        | 0.022   | 0.008                                            |         |
| Male, age spline over 75                    | -0.059                                       | 0.042   | -0.015                                           |         |
| Lag of Doctor ever - heart disease          | 0.032                                        | 0.041   | 0.008                                            |         |
| Lag of Doctor ever - cancer                 |                                              |         |                                                  |         |
| Lag of Doctor ever - hypertension           |                                              |         |                                                  |         |
| Lag of Doctor ever - diabetes               | 0.072                                        | 0.052   | 0.019                                            |         |
| Lag of Ever smoked cigarettes               |                                              |         |                                                  |         |
| Lag of Current smoker                       |                                              |         |                                                  |         |
| Lag of Any light or heavy physical activity | 0.116***                                     | 0.029   | 0.029                                            |         |
| Log(BMI) spline, BMI < 30                   | 0.217**                                      | 0.088   | 0.057                                            |         |
| Log(BMI) spline, BMI > 30                   | 0.172                                        | 0.135   | 0.045                                            |         |
| Black, Less than HS                         | 0.132**                                      | 0.058   | 0.036                                            |         |
| Black, College                              | -0.205**                                     | 0.094   | -0.049                                           |         |
| Black, Beyond College                       | 0.206                                        | 0.196   | 0.059                                            |         |
| Hispanic, Less than HS                      | 0.131                                        | 0.106   | 0.036                                            |         |
| Hispanic, College                           | -0.050                                       | 0.171   | -0.013                                           |         |
| Hispanic, Beyond College                    | -0.473                                       | 0.293   | -0.098                                           |         |
| Lag of married from marriage history        |                                              |         |                                                  |         |
| Lag of cohab                                |                                              |         |                                                  |         |
| Male, previously married                    |                                              |         |                                                  |         |
| Male, previously cohabitating               |                                              |         |                                                  |         |
| Lag of Doctor ever - chronic lung disease   | -0.121***                                    | 0.044   | -0.030                                           |         |
| _cons                                       | -1.096***                                    | 0.367   |                                                  |         |

note: .01 - \*\*\*; .05 - \*\*; .1 - \*;





|                                      | Log(BMI) (logbmi)<br>coefficients |         | Log(BMI) (logbmi)<br>marginal effects |         |
|--------------------------------------|-----------------------------------|---------|---------------------------------------|---------|
|                                      | coef                              | p-value | coef                                  | p-value |
| Non-hispanic black                   | 0.009***                          | 0.001   | 0.009                                 |         |
| Hispanic                             | 0.004**                           | 0.002   | 0.004                                 |         |
| Less than HS/GED                     | 0.000                             | 0.001   | 0.000                                 |         |
| College                              | -0.007***                         | 0.001   | -0.007                                |         |
| Beyond college                       | -0.007***                         | 0.001   | -0.007                                |         |
| Black, Less than HS                  | -0.005***                         | 0.002   | -0.005                                |         |
| Black, College                       | 0.006***                          | 0.002   | 0.006                                 |         |
| Black, Beyond College                | 0.007**                           | 0.003   | 0.007                                 |         |
| Hispanic, Less than HS               | -0.002                            | 0.003   | -0.002                                |         |
| Hispanic, College                    | 0.005                             | 0.004   | 0.005                                 |         |
| Hispanic, Beyond College             | -0.005                            | 0.005   | -0.005                                |         |
| Male                                 | -0.003*                           | 0.001   | -0.003                                |         |
| Black male                           | -0.009***                         | 0.001   | -0.009                                |         |
| Hispanic male                        | -0.005**                          | 0.002   | -0.005                                |         |
| Poor as a child                      | 0.002**                           | 0.001   | 0.002                                 |         |
| Wealthy as a child                   | -0.001*                           | 0.001   | -0.001                                |         |
| Childhood health - fair              | 0.003                             | 0.003   | 0.003                                 |         |
| Childhood health - good              | 0.001                             | 0.003   | 0.001                                 |         |
| Childhood health - very good         | -0.000                            | 0.003   | -0.000                                |         |
| Childhood health - excellent         | -0.001                            | 0.003   | -0.001                                |         |
| Age spline, less than 35             | -0.000                            | 0.000   | -0.000                                |         |
| Age spline, 35 to 44                 | -0.000**                          | 0.000   | -0.000                                |         |
| Age spline, 45 to 54                 | -0.000***                         | 0.000   | -0.000                                |         |
| Age spline, 55 to 64                 | -0.000                            | 0.000   | -0.000                                |         |
| Age spline, 65 to 74                 | -0.001***                         | 0.000   | -0.001                                |         |
| Age spline, more than 75             | -0.002***                         | 0.000   | -0.002                                |         |
| Lag of log(BMI) spline, BMI < 30     | 0.918***                          | 0.002   | 0.918                                 |         |
| Lag of log(BMI) spline, BMI > 30     | 0.879***                          | 0.003   | 0.879                                 |         |
| Lag of married from marriage history | -0.007***                         | 0.001   | -0.007                                |         |
| Lag of cohab                         | -0.003*                           | 0.002   | -0.003                                |         |
| Male, previously married             | 0.007***                          | 0.001   | 0.007                                 |         |
| Male, previously cohabitating        | 0.003                             | 0.002   | 0.003                                 |         |
| _cons                                | 0.296***                          | 0.010   |                                       |         |

note: .01 - \*\*\*; .05 - \*\*; .1 - \*;

|                                           | Died (died) coefficients |         | Died (died) marginal effects |         | Partner died (part_died) coefficients |         | Partner died (part_died) marginal effects |         | R live in nursing home at interview (nhmliv) coefficients |         | R live in nursing home at interview (nhmliv) marginal effects |         |
|-------------------------------------------|--------------------------|---------|------------------------------|---------|---------------------------------------|---------|-------------------------------------------|---------|-----------------------------------------------------------|---------|---------------------------------------------------------------|---------|
|                                           | coef                     | p-value | coef                         | p-value | coef                                  | p-value | coef                                      | p-value | coef                                                      | p-value | coef                                                          | p-value |
| Non-hispanic black                        | 0.047**                  | 0.020   | 0.002                        |         | 0.385                                 | 0.275   | 0.005                                     |         | -0.238***                                                 | 0.039   | -0.002                                                        |         |
| Hispanic                                  | -0.109***                | 0.031   | -0.004                       |         | 0.090                                 | 0.465   | 0.001                                     |         | -0.353***                                                 | 0.055   | -0.003                                                        |         |
| Less than HS or GED education             | 0.048***                 | 0.019   | 0.002                        |         | 0.142**                               | 0.056   | 0.002                                     |         | 0.043                                                     | 0.027   | 0.001                                                         |         |
| College degree or higher                  | -0.056***                | 0.019   | -0.002                       |         | -0.160***                             | 0.053   | -0.001                                    |         | -0.044*                                                   | 0.027   | -0.001                                                        |         |
| Male                                      | -0.403                   | 0.602   | -0.015                       |         | 0.132                                 | 0.308   | 0.001                                     |         | -0.100***                                                 | 0.027   | -0.001                                                        |         |
| Black male                                | 0.057*                   | 0.029   | 0.002                        |         | 0.108                                 | 0.482   | 0.001                                     |         | 0.417***                                                  | 0.061   | 0.008                                                         |         |
| Hispanic male                             | 0.055                    | 0.045   | 0.002                        |         | 1.247                                 | 0.825   | 0.059                                     |         | 0.224**                                                   | 0.089   | 0.004                                                         |         |
| Age spline, less than 35                  | -0.008                   | 0.015   | -0.000                       |         |                                       |         |                                           |         |                                                           |         |                                                               |         |
| Age spline, 35 to 44                      | 0.032***                 | 0.012   | 0.001                        |         |                                       |         |                                           |         |                                                           |         |                                                               |         |
| Age spline, 45 to 54                      | 0.016**                  | 0.007   | 0.001                        |         |                                       |         |                                           |         | -0.018                                                    | 0.037   | -0.000                                                        |         |
| Age spline, 55 to 64                      | 0.024***                 | 0.004   | 0.001                        |         |                                       |         |                                           |         | 0.045***                                                  | 0.009   | 0.001                                                         |         |
| Age spline, 65 to 74                      | 0.032***                 | 0.003   | 0.001                        |         | 0.061***                              | 0.009   | 0.001                                     |         | 0.040***                                                  | 0.005   | 0.000                                                         |         |
| Age spline, 75 to 84                      | 0.048***                 | 0.003   | 0.002                        |         |                                       |         |                                           |         |                                                           |         |                                                               |         |
| Age spline, more than 85                  | 0.064***                 | 0.003   | 0.002                        |         |                                       |         |                                           |         |                                                           |         |                                                               |         |
| Male, age spline less than 35             | 0.022                    | 0.021   | 0.001                        |         |                                       |         |                                           |         |                                                           |         |                                                               |         |
| Male, age spline 35 to 44                 | -0.026                   | 0.016   | -0.001                       |         |                                       |         |                                           |         |                                                           |         |                                                               |         |
| Male, age spline 45 to 54                 | 0.015                    | 0.011   | 0.001                        |         |                                       |         |                                           |         |                                                           |         |                                                               |         |
| Male, age spline 55 to 64                 | 0.001                    | 0.006   | 0.000                        |         |                                       |         |                                           |         |                                                           |         |                                                               |         |
| Male, age spline 65 to 74                 | 0.001                    | 0.005   | 0.000                        |         |                                       |         |                                           |         |                                                           |         |                                                               |         |
| Male, age spline 75 to 84                 | -0.007                   | 0.004   | -0.000                       |         |                                       |         |                                           |         |                                                           |         |                                                               |         |
| Male, age spline over 85                  | 0.013**                  | 0.005   | 0.000                        |         |                                       |         |                                           |         |                                                           |         |                                                               |         |
| Lag of Doctor ever - heart disease        | 0.188***                 | 0.012   | 0.008                        |         |                                       |         |                                           |         | -0.044*                                                   | 0.024   | -0.001                                                        |         |
| Lag of Doctor ever - stroke               | 0.221***                 | 0.016   | 0.010                        |         |                                       |         |                                           |         | 0.351***                                                  | 0.027   | 0.006                                                         |         |
| Lag of Doctor ever - cancer               | 0.408***                 | 0.014   | 0.022                        |         |                                       |         |                                           |         | -0.055*                                                   | 0.028   | -0.001                                                        |         |
| Lag of Doctor ever - hypertension         | 0.127***                 | 0.012   | 0.005                        |         |                                       |         |                                           |         | -0.056**                                                  | 0.023   | -0.001                                                        |         |
| Lag of Doctor ever - diabetes             | 0.227***                 | 0.013   | 0.010                        |         |                                       |         |                                           |         | 0.148***                                                  | 0.026   | 0.002                                                         |         |
| Lag of Doctor ever - chronic lung disease | 0.349***                 | 0.015   | 0.018                        |         |                                       |         |                                           |         | -0.071**                                                  | 0.035   | -0.001                                                        |         |
| Lag of one ADL                            | 0.265***                 | 0.017   | 0.013                        |         |                                       |         |                                           |         | 0.384***                                                  | 0.031   | 0.007                                                         |         |
| Lag of two ADLs                           | 0.405***                 | 0.022   | 0.023                        |         |                                       |         |                                           |         | 0.707***                                                  | 0.037   | 0.021                                                         |         |
| Lag of three or more ADLs                 | 0.809***                 | 0.017   | 0.067                        |         |                                       |         |                                           |         | 1.225***                                                  | 0.028   | 0.067                                                         |         |
| Lag of Current smoker                     | 0.306***                 | 0.016   | 0.015                        |         |                                       |         |                                           |         | 0.127***                                                  | 0.037   | 0.002                                                         |         |
| Male, less than high school               | 0.009                    | 0.027   | 0.000                        |         | -0.029                                | 0.095   | -0.000                                    |         |                                                           |         |                                                               |         |
| Male, college or more                     | -0.049*                  | 0.027   | -0.002                       |         | 0.137                                 | 0.088   | 0.001                                     |         |                                                           |         |                                                               |         |
| Age spline, less than 65                  |                          |         |                              |         | 0.032***                              | 0.003   | 0.000                                     |         |                                                           |         |                                                               |         |
| Age spline, more than 75                  |                          |         |                              |         | 0.017*                                | 0.010   | 0.000                                     |         | 0.061***                                                  | 0.002   | 0.001                                                         |         |
| Male, less than 65                        |                          |         |                              |         | -0.010                                | 0.006   | -0.000                                    |         |                                                           |         |                                                               |         |
| Male, age 65 to 74                        |                          |         |                              |         | -0.019                                | 0.015   | -0.000                                    |         |                                                           |         |                                                               |         |
| Male, age more than 75                    |                          |         |                              |         | 0.025*                                | 0.013   | 0.000                                     |         |                                                           |         |                                                               |         |
| Black, age spline less than 65            |                          |         |                              |         | 0.000                                 | 0.005   | 0.000                                     |         |                                                           |         |                                                               |         |
| Black, age spline 65 to 74                |                          |         |                              |         | -0.044**                              | 0.020   | -0.000                                    |         |                                                           |         |                                                               |         |
| Black, age spline over 75                 |                          |         |                              |         | 0.064**                               | 0.029   | 0.001                                     |         |                                                           |         |                                                               |         |
| Hispanic, age spline less than 65         |                          |         |                              |         | -0.001                                | 0.009   | -0.000                                    |         |                                                           |         |                                                               |         |
| Hispanic, age spline 65 to 74             |                          |         |                              |         | -0.014                                | 0.034   | -0.000                                    |         |                                                           |         |                                                               |         |
| Hispanic, age spline over 75              |                          |         |                              |         | 0.035                                 | 0.050   | 0.000                                     |         |                                                           |         |                                                               |         |
| Black male, less than 65                  |                          |         |                              |         | -0.007                                | 0.010   | -0.000                                    |         |                                                           |         |                                                               |         |
| Black male, 65 to 74                      |                          |         |                              |         | 0.028                                 | 0.034   | 0.000                                     |         |                                                           |         |                                                               |         |
| Black male, over 75                       |                          |         |                              |         | -0.024                                | 0.042   | -0.000                                    |         |                                                           |         |                                                               |         |
| Hispanic male, less than 65               |                          |         |                              |         | -0.035*                               | 0.019   | -0.000                                    |         |                                                           |         |                                                               |         |
| Hispanic male, 65 to 74                   |                          |         |                              |         | 0.111                                 | 0.073   | 0.001                                     |         |                                                           |         |                                                               |         |
| Hispanic male, over 75                    |                          |         |                              |         | -0.049                                | 0.073   | -0.000                                    |         |                                                           |         |                                                               |         |
| Lag of Widowed: most recent spouse died   |                          |         |                              |         |                                       |         |                                           |         | 0.241***                                                  | 0.024   | 0.004                                                         |         |
| _cons                                     | -2.971***                | 0.432   |                              |         | -4.117***                             | 0.183   |                                           |         | -3.201***                                                 | 0.342   |                                                               |         |

note: .01 - \*\*\*; .05 - \*\*; .1 - \*;

# The Future Elderly Model: Technical Documentation

Dana P. Goldman, University of Southern California  
Duncan Ermini Leaf, University of Southern California  
Jeffrey Sullivan, Precision Health Economics, LLC  
Bryan Tysinger, University of Southern California

September 8, 2021

# Contents

|          |                                                                                         |           |
|----------|-----------------------------------------------------------------------------------------|-----------|
| <b>1</b> | <b>Functioning of the dynamic model</b>                                                 | <b>5</b>  |
| 1.1      | Background . . . . .                                                                    | 5         |
| 1.2      | Overview . . . . .                                                                      | 5         |
| 1.3      | Comparison with other prominent microsimulation models of health expenditures . . . . . | 6         |
| 1.3.1    | CBOLT Model . . . . .                                                                   | 7         |
| 1.3.2    | Centers for Medicare and Medicaid Services . . . . .                                    | 7         |
| <b>2</b> | <b>Data sources used for estimation</b>                                                 | <b>7</b>  |
| 2.1      | Health and Retirement Study . . . . .                                                   | 8         |
| 2.2      | Social Security covered earnings files . . . . .                                        | 8         |
| 2.3      | National Health Interview Survey . . . . .                                              | 9         |
| 2.4      | Medical Expenditure Panel Survey . . . . .                                              | 9         |
| 2.5      | Medicare Current Beneficiary Survey . . . . .                                           | 9         |
| <b>3</b> | <b>Data sources for trends and baseline scenario</b>                                    | <b>10</b> |
| 3.1      | Data for trends in entering cohorts . . . . .                                           | 10        |
| 3.2      | Data for other projections . . . . .                                                    | 10        |
| 3.3      | Demographic adjustments . . . . .                                                       | 10        |
| <b>4</b> | <b>Estimation</b>                                                                       | <b>11</b> |
| 4.1      | Transition model . . . . .                                                              | 11        |
| 4.1.1    | Inverse Hyperbolic Sine Transformation . . . . .                                        | 12        |
| 4.2      | Quality adjusted life years . . . . .                                                   | 13        |
| <b>5</b> | <b>Model for new cohorts</b>                                                            | <b>14</b> |
| 5.1      | Information available and empirical strategy . . . . .                                  | 14        |
| 5.2      | Model and estimation . . . . .                                                          | 14        |
| <b>6</b> | <b>Government revenues and expenditures</b>                                             | <b>15</b> |
| 6.1      | Social Security benefits . . . . .                                                      | 15        |
| 6.2      | Disability Insurance benefits . . . . .                                                 | 16        |
| 6.3      | Supplemental Security Income benefits . . . . .                                         | 16        |
| 6.4      | Medical costs estimation . . . . .                                                      | 16        |
| 6.5      | Taxes . . . . .                                                                         | 17        |
| <b>7</b> | <b>Scenarios and robustness</b>                                                         | <b>18</b> |
| 7.1      | Obesity reduction scenario . . . . .                                                    | 18        |
| <b>8</b> | <b>Implementation</b>                                                                   | <b>18</b> |
| 8.1      | Intervention Module . . . . .                                                           | 19        |
| <b>9</b> | <b>Model development</b>                                                                | <b>20</b> |
| 9.1      | Transition model . . . . .                                                              | 20        |
| 9.2      | Quality adjusted life years . . . . .                                                   | 21        |
| 9.2.1    | Health related quality-of-life measures . . . . .                                       | 21        |
| 9.2.2    | Health related quality-of-life in MEPS . . . . .                                        | 21        |
| 9.2.3    | MEPS-HRS Crosswalk development . . . . .                                                | 21        |

|           |                                                        |           |
|-----------|--------------------------------------------------------|-----------|
| 9.3       | Drug Expenditures . . . . .                            | 23        |
| 9.3.1     | Drug Expenditures - MEPS . . . . .                     | 23        |
| 9.3.2     | Drug Expenditures - MCBS . . . . .                     | 23        |
| 9.3.3     | Drug Expenditures - Estimation . . . . .               | 23        |
| <b>10</b> | <b>Validation</b>                                      | <b>24</b> |
| 10.1      | Data Splitting . . . . .                               | 24        |
| 10.1.1    | Demographics . . . . .                                 | 24        |
| 10.1.2    | Health Outcomes . . . . .                              | 24        |
| 10.1.3    | Health Risk Factors . . . . .                          | 24        |
| 10.2      | External Validation . . . . .                          | 25        |
| 10.2.1    | Benefits from Social Security Administration . . . . . | 25        |
| 10.2.2    | Benefits from Medicare and Medicaid . . . . .          | 25        |
| 10.3      | External Corroboration . . . . .                       | 25        |
| <b>11</b> | <b>Baseline Forecasts</b>                              | <b>26</b> |
| 11.1      | Disease Prevalence . . . . .                           | 26        |
| <b>12</b> | <b>Acknowledgments</b>                                 | <b>29</b> |
| <b>13</b> | <b>Tables</b>                                          | <b>29</b> |
|           | <b>References</b>                                      | <b>50</b> |

## List of Figures

|   |                                                                            |    |
|---|----------------------------------------------------------------------------|----|
| 1 | Architecture of the FEM . . . . .                                          | 6  |
| 2 | Distribution of EQ-5D index scores for ages 51+ in 2001 MEPS . . . . .     | 22 |
| 3 | Historic and Forecasted Chronic Disease Prevalence for Men 55+ . . . . .   | 27 |
| 4 | Historic and Forecasted Chronic Disease Prevalence for Women 55+ . . . . . | 27 |
| 5 | Historic and Forecasted ADL and IADL Prevalence for Men 55+ . . . . .      | 28 |
| 6 | Historic and Forecasted ADL and IADL Prevalence for Women 55+ . . . . .    | 28 |

## List of Tables

|    |                                                                                                                                             |    |
|----|---------------------------------------------------------------------------------------------------------------------------------------------|----|
| 1  | Health condition prevalences in survey data . . . . .                                                                                       | 30 |
| 2  | Survey questions used to determine health conditions . . . . .                                                                              | 31 |
| 3  | Data sources and methods for projecting future cohort trends . . . . .                                                                      | 32 |
| 4  | Projected baseline trends for future cohorts . . . . .                                                                                      | 33 |
| 5  | Prevalence of obesity, hypertension, diabetes and current smokers among ages 46-56 in 1978 and 2004 . . . . .                               | 34 |
| 6  | Outcomes in the transition model . . . . .                                                                                                  | 35 |
| 7  | Restrictions on transition model . . . . .                                                                                                  | 36 |
| 8  | Descriptive statistics for exogeneous control variables . . . . .                                                                           | 37 |
| 9  | Data-splitting validation of 1998 cohort: Simulated vs reported mortality and nursing home outcomes in 2000, 2006, and 2012 . . . . .       | 38 |
| 10 | Data-splitting validation of 1998 cohort: Simulated vs reported demographic outcomes in 2000, 2006, and 2012 . . . . .                      | 38 |
| 11 | Data-splitting validation of 1998 cohort: Simulated vs reported binary health outcomes in 2000, 2006, and 2012 . . . . .                    | 38 |
| 12 | Data-splitting validation of 1998 cohort: Simulated vs reported risk factor outcomes in 2000, 2006, and 2012 . . . . .                      | 39 |
| 13 | Prevalence of IADL and ADL limitations among ages 51+ in MEPS 2001 and HRS 1998 . . . . .                                                   | 39 |
| 14 | Prevalence of IADL limitation and physical function limitation among ages 51+ in MEPS 2001 and HRS 1998 . . . . .                           | 39 |
| 15 | OLS regressions of EQ-5D utility index among ages 51+ in MEPS 2001 . . . . .                                                                | 40 |
| 16 | OLS regression of the predicted EQ-5D index score against chronic conditions and FEM-type functional status specification . . . . .         | 41 |
| 17 | Average predicted EQ-5D score, age, and prevalence of chronic conditions by functional status for the stock FEM simulation sample . . . . . | 42 |
| 18 | Initial conditions used for estimation (1992) and simulation (2004) . . . . .                                                               | 43 |
| 19 | Parameter estimates for latent model: conditional means and thresholds . . . . .                                                            | 44 |
| 20 | Parameter estimates for latent model: parameterized covariance matrix . . . . .                                                             | 45 |
| 21 | Per capita medical spending by payment source, age group, and year . . . . .                                                                | 46 |
| 22 | Simulation results for status quo scenario . . . . .                                                                                        | 46 |
| 23 | Simulation results for obesity reduction scenario compared to status quo . . . . .                                                          | 47 |
| 24 | Assumptions for each calendar year . . . . .                                                                                                | 48 |
| 25 | Assumptions for each birth year . . . . .                                                                                                   | 49 |

This appendix describes technical details to support the paper "Measuring the COVID-19 Mortality Burden in the United States: A Microsimulation Study". In addition to outcomes described in the paper, the microsimulation provides additional outcomes (e.g. medical expenditures and social security benefits). As the data sources and models are intricately connected, we report all data sources and methodology to provide a complete picture of the microsimulation to the reader. However, the sections that are most relevant to this paper are: section 1 for an overview; data source sections 2.1 (HRS), 2.3 (NHIS), 2.4 (MEPS), and 3 (trends and baseline scenario); sections 4 and 5 for estimation of the transition model and the model for new cohorts, respectively; section 8 for the implementation; sections 9.1 and 9.2 for a historical background of the development of transition models and QALY measures; sections 10.1 and 10.3 for validation strategies; and section 11 for baseline forecasts.

## 1 Functioning of the dynamic model

### 1.1 Background

The Future Elderly Model (FEM) is a microsimulation model originally developed out of an effort to examine health and health care costs among the elderly Medicare population (age 65+). A description of the previous incarnation of the model can be found in Goldman et al. (2004). The original work was funded by the Centers for Medicare and Medicaid Services and carried out by a team of researchers composed of Dana P. Goldman, Paul G. Shekelle, Jayanta Bhattacharya, Michael Hurd, Geoffrey F. Joyce, Darius N. Lakdawalla, Dawn H. Matsui, Sydne J. Newberry, Constantijn W. A. Panis and Baoping Shang.

Since then various extensions have been implemented to the original model. The most recent version now projects health outcomes for all Americans aged 51 and older and uses the Health and Retirement Study (HRS) as a host dataset rather than the Medicare Current Beneficiary Survey (MCBS). The work has also been extended to include economic outcomes such as earnings, labor force participation and pensions. This work was funded by the National Institute on Aging through its support of the RAND Roybal Center for Health Policy Simulation (P30AG024968), the Department of Labor through contract J-9-P-2-0033, the National Institutes of Aging through the R01 grant "Integrated Retirement Modeling" (R01AG030824) and the MacArthur Foundation Research Network on an Aging Society. Finally, the computer code of the model was transferred from Stata to C++. This report incorporates these new development efforts in the description of the model.

### 1.2 Overview

The defining characteristic of the model is the modeling of real rather than synthetic cohorts, all of whom are followed at the individual level. This allows for more heterogeneity in behavior than would be allowed by a cell-based approach. Also, since the HRS interviews both respondent and spouse, we can link records to calculate household-level outcomes such as net income and Social Security retirement benefits, which depend on the outcomes of both spouses. The omission of the population younger than age 51 sacrifices little generality, since the bulk of expenditure on the public programs we consider occurs after age 50. However, we may fail to capture behavioral responses among the young.

The model has three core components:



- The initial cohort module predicts the economic and health outcomes of new cohorts of 51/52 year-olds. This module takes in data from the Health and Retirement Study (HRS) and trends calculated from other sources. It allows us to “generate” cohorts as the simulation proceeds, so that we can measure outcomes for the age 51+ population in any given year.
- The transition module calculates the probabilities of transiting across various health states and financial outcomes. The module takes as inputs risk factors such as smoking, weight, age and education, along with lagged health and financial states. This allows for a great deal of heterogeneity and fairly general feedback effects. The transition probabilities are estimated from the longitudinal data in the Health and Retirement Study (HRS).
- The policy outcomes module aggregates projections of individual-level outcomes into policy outcomes such as taxes, medical care costs, pension benefits paid, and disability benefits. This component takes account of public and private program rules to the extent allowed by the available outcomes. Because we have access to HRS-linked restricted data from Social Security records and employer pension plans, we are able to realistically model retirement benefit receipt.

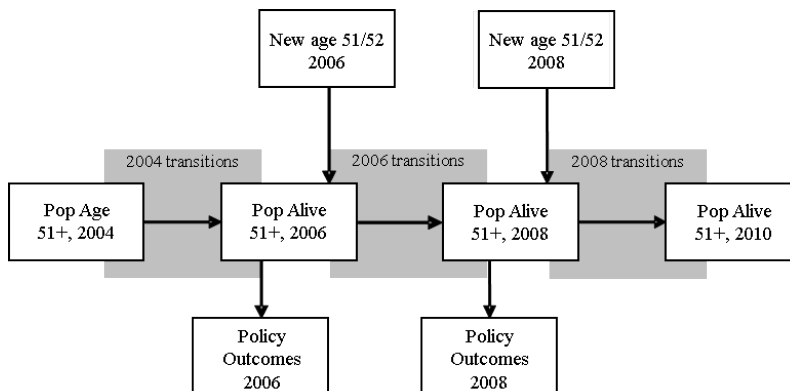

Figure 1: Architecture of the FEM

Figure 1 provides a schematic overview of the model. We start in 2004 with an initial population aged 51+ taken from the HRS. We then predict outcomes using our estimated transition probabilities (see section 4.1). Those who survive make it to the end of that year, at which point we calculate policy outcomes for the year. We then move to the following time period (two years later), when a new cohort of 51 and 52 year-olds enters (see section 5.1). This entrance forms the new age 51+ population, which then proceeds through the transition model as before. This process is repeated until we reach the final year of the simulation.

### 1.3 Comparison with other prominent microsimulation models of health expenditures

The FEM is unique among existing models that make health expenditure projections. It is the only model that projects health trends rather than health expenditures. It is also the only model that generates mortality out of assumptions on health trends rather than historical time series.

### 1.3.1 CBOLT Model

The Congressional Budget Office (CBO) uses time-series techniques to project health expenditure growth in the short term and then makes an assumption on long-term growth. They use a long term growth of excess costs of 2.3 percentage points starting in 2020 for Medicare. They then assume a reduction in excess cost growth in Medicare of 1.5% through 2083, leaving a rate of 0.9% in 2083. For non-Medicare spending they assume an annual decline of 4.5%, leading to an excess growth rate in 2083 of 0.1%.

### 1.3.2 Centers for Medicare and Medicaid Services

The Centers for Medicare and Medicaid Services (CMS) performs an extrapolation of medical expenditures over the first ten years, then computes a general equilibrium model for years 25 through 75 and linearly interpolates to identify medical expenditures in years 11 through 24 of their estimation. The core assumption they use is that excess growth of health expenditures will be one percentage point higher per year for years 25-75 (that is if nominal GDP growth is 4%, health care expenditure growth will be 5%).

## 2 Data sources used for estimation

The Health and Retirement Study is the main data source for the model. We supplemented this data with merged Social Security covered earnings histories and data on health trends and health care costs coming from 3 major health surveys in the U.S. We describe these surveys below and the samples we selected for the analysis. We first list the variables used in the analysis. We then give details on the data sources.

### Estimated Outcomes in Initial Conditions Model

#### Economic Outcomes

Employment  
Earnings  
Wealth  
Defined Contribution Pension Wealth  
Pension Plan Type  
AIME  
Social Security Quarters of Coverage  
Health Insurance

#### Health Outcomes

Hypertension  
Heart Disease  
Self-Reported Health  
BMI Status  
Smoking Status  
Functional Status

## Estimated Outcomes in/from Transition Model

| <b>Economic Outcomes</b>   | <b>Health Outcomes</b> | <b>Other Outcomes</b>      |
|----------------------------|------------------------|----------------------------|
| Employment                 | Death                  | Income Tax Revenue         |
| Earnings                   | Heart                  | Social Security Revenue    |
| Wealth                     | Stroke                 | Medicare Revenue           |
| Demographics               | Cancer                 | Medical Expenses           |
| Health Insurance           | Hypertension           | Medicare Part A Expenses   |
| Disability Insurance Claim | Diabetes               | Medicare Part B Expenses   |
| Defined Benefit Claim      | Lung Disease           | Medicare Part B Enrollment |
| SSI Claim                  | Nursing Home           | Medicare Part D Enrollment |
| Social Security Claim      | BMI                    | OASI Enrollment            |
|                            | Smoking Status         | DI enrollment              |
|                            | ADL Limitations        | SSI enrollment             |
|                            | IADL Limitations       | Medicaid Enrollment        |
|                            |                        | Medicaid Expenditures      |

### 2.1 Health and Retirement Study

The Health and Retirement Study (HRS) waves 2000-2008 are used to estimate the transition model. Interviews occur every two years. We use the dataset created by RAND (RAND HRS, version K) as our basis for the analysis. We use all cohorts in the analysis and consider sampling weights whenever appropriate. When appropriately weighted, the HRS in 2004 is representative of U.S. households where at least one member is at least 51. The HRS is also used as the host data for the simulation (pop 51+ in 2004) and for new cohorts (aged 51 and 52 in 2004).

The HRS adds new cohorts every six years. Until recently, the latest available cohort had been added in 2004, which is why that is the FEM's base year. The FEM is currently being updated to use the newly released 2010 data.

### 2.2 Social Security covered earnings files

To get information on Social Security entitlements of respondents, we match the HRS data to the Social Security Covered Earnings files of 1992, 1993, 1998, 2004 and 2006 which provides information on earning histories of respondents as well as their entitlement to future Social Security benefits. We then construct the average indexed monthly earnings (AIME), the basis for the determination of benefit levels, from these earning histories. The AIME is constructed by first indexing using the National Wage Index (NWI) to the wage level when the respondent turns age 60. If this occurs after 2008, we project the evolution of the NWI using the average annual rate of change of the last 20 years (2.9% nominal). We then take the 35 highest years (if less than 35 years are available, remaining years are considered zero earning years) and take the average. We then convert back this annual amount on a monthly basis and convert back to \$2004 U.S. dollars using the CPI. Quarters of coverage, which determine eligibility to Social Security, are defined as the sum of posted quarters to the file. A worker is eligible for Social Security if he has accumulated at least 40 quarters of coverage. A worker roughly accumulates a quarter of coverage for every \$4000 of coverage earnings up to a maximum of 4 per year. Not all respondents agree to have their record matched. Hence, there is the potential for non-representativeness. However, recent studies show that the extent of non-representativeness is quite small and that appropriate weighting using HRS weights mostly corrects for this problem (Kapteyn et al., 2006).

## 2.3 National Health Interview Survey

The National Health Interview Survey (NHIS) contains individual-level data on height, weight, smoking status, self-reported chronic conditions, income, education, and demographic variables. It is a repeated cross-section done every year for several decades. But the survey design has been significantly modified several times. Before year 1997, different subgroups of individuals were asked about different sets of chronic conditions, after year 1997, a selected sub-sample of the adults were asked a complete set of chronic conditions. The survey questions are quite similar to that in HRS. As a result, for projecting the trends of chronic conditions for future 51/52 year-olds, we only use data from 1997 to 2010. A review of survey questions is provided in Table 2. Information on weight and height were asked every year, while information on smoking was asked in selected years before year 1997, and has been asked annually since year 1997.

FEM uses NHIS to project prevalence of chronic conditions in future cohorts of 51-52 year olds. The method is discussed in Sections 3.1 and 5.1. FEM also relies on the Medical Expenditure Panel Survey, a subsample of NHIS respondents, for model estimation. See section 2.4 for a description.

## 2.4 Medical Expenditure Panel Survey

The Medical Expenditure Panel Survey (MEPS), beginning in 1996, is a set of large-scale surveys of families and individuals, their medical providers (doctors, hospitals, pharmacies, etc.), and employers across the United States. The Household Component (HC) of the MEPS provides data from individual households and their members, which is supplemented by data from their medical providers. The Household Component collects data from a representative sub sample of households drawn from the previous year's National Health Interview Survey (NHIS). Since NHIS does not include the institutionalized population, neither does MEPS: this implies that we can only use the MEPS to estimate medical costs for the non-elderly population. Information collected during household interviews include: demographic characteristics, health conditions, health status, use of medical services, sources of medical payments, and body weight and height. Each year the household survey includes approximately 12,000 households or 34,000 individuals. Sample size for those aged 51-64 is about 4,500. MEPS has comparable measures of social-economic (SES) variables as those in HRS, including age, race/ethnicity, educational level, census region, and marital status.

FEM uses MEPS years 2000-2010 for cost estimation. See Section 6.4 for a description. FEM also uses MEPS 2001 data for QALY model estimation. This is described in Section 4.2.

## 2.5 Medicare Current Beneficiary Survey

The Medicare Current Beneficiary Survey (MCBS) is a nationally representative sample of aged, disabled and institutionalized Medicare beneficiaries. The MCBS attempts to interview each respondent twelve times over three years, regardless of whether he or she resides in the community, a facility, or transitions between community and facility settings. The disabled (under 65 years of age) and oldest-old (85 years of age or older) are over-sampled. The first round of interviewing was conducted in 1991. Originally, the survey was a longitudinal sample with periodic supplements and indefinite periods of participation. In 1994, the MCBS switched to a rotating panel design with limited periods of participation. Each fall a new panel is introduced, with a target sample size of 12,000 respondents and each summer a panel is retired. Institutionalized respondents are interviewed by proxy. The MCBS contains comprehensive self-reported information on the health status, health care use and expenditures, health insurance coverage, and socioeconomic and demographic characteristics of the entire spectrum of Medicare beneficiaries. Medicare claims data for

beneficiaries enrolled in fee-for-service plans are also used to provide more accurate information on health care use and expenditures. MCBS years 1992-2010 are used for estimating medical cost and enrollment models. See section 6.4 for discussion.

### 3 Data sources for trends and baseline scenario

Two types of trends need to be projected in the model. First, we need to project trends in the incoming cohorts (the future new age 51/52 individuals). This includes trends in health and economic outcomes. Second, we need to project excess aggregate growth in real income and excess growth in health spending.

#### 3.1 Data for trends in entering cohorts

We used a multitude of data sources to compute U.S. trends. First, we used NHIS for chronic conditions and applied the methodology discussed in (Goldman et al., 2004). The method consists of projecting the experience of younger cohorts into the future until they reach age 51. The projection method is tailored to the synthetic cohorts observed in NHIS. For example, we observe a representative sample of age 35 individuals born in 1945 in 1980. We follow their disease patterns in 1980 to 1981 surveys by then selecting those aged 36 in 1981, accounting for mortality, etc.

We then collected information on other trends, i.e. for obesity and smoking, from other studies (Honeycutt et al., 2003; Levy, 2006; Poterba et al., 2009; Ruhm, 2007; Mainous III et al., 2007). Table 3 presents the sources and Table 4 presents the trends we use in the baseline scenario. Table 5 presents the prevalence of obesity, hypertension, diabetes, and current smokers in 1978 and 2004, and the annual rates of change from 1978 to 2004. We refer the readers to the analysis in Goldman et al. (2004) for information on how the trends were constructed.

#### 3.2 Data for other projections

We make two assumptions relating to real growth in wages and medical costs. Firstly, as is done in the 2009 Social Security Trustees report intermediate cost scenario, we assume a long term real increase in wages (earnings) of 1.1% per year. Next, following the Centers for Medicare and Medicaid Services, we assume excess real growth in medical costs (that is additional cost growth to GDP growth), as 1.5% in 2004, reducing linearly to 1% in 2033, .4% in 2053, and -.2% in 2083. We also include the Affordable Care Act cost growth targets as an optional cap on medical cost growth. Baseline medical spending figures presented assume those targets are met. GDP growth in the near term (through 2019) is based on CBO projections, with the OASDI Trustees assumption of 2% yearly afterwards.

#### 3.3 Demographic adjustments

We make two adjustments to the weighting in the HRS to match population counts. Since we deleted some cases from the data and only considered the set of respondents with matched Social Security records, this takes account of selectivity based on these characteristics. First, we post-stratify the HRS sample by 5 year age groups, gender and race and rebalance weights using the Census Bureau 2000-2010 Intercensal Population Estimates. We do this for both the host data set and the new cohorts. We scale the weights for future new cohorts using 2012 National Population Projections based on race and gender. Second, we post-stratify the HRS sample of deaths between

the 2002 and 2004 interview waves by 5 year age groups, gender and race and rebalance weights based on the Human Mortality Database.

Once the simulation begins, trends in migration and mortality are applied. We use net migration from the SSA Trustees report intermediate cost scenario. Separate mortality rate adjustment factors are defined for the under and over 65 age groups based on the mortality projections from the 2013 SSA Trustees report. The SSA projections are interpolated through 2090, then extended using GLM with log link through 2150. The average yearly all-cause mortality reduction between 2020 and 2150 was 1.06% for ages 25-64, and 0.66% for the 65+ population.

## 4 Estimation

In this section we describe the approach used to estimate the transition model, the core of the FEM, and the initial cohort model which is used to rejuvenate the simulation population.

### 4.1 Transition model

We consider a large set of outcomes for which we model transitions. Table 6 gives the set of outcomes considered for the transition model along with descriptive statistics and the population at risk when estimating the relationships.

Since we have a stock sample from the age 51+ population, each respondent goes through an individual-specific series of intervals. Hence, we have an unbalanced panel over the age range starting from 51 years old. Denote by  $j_{i0}$  the first age at which respondent  $i$  is observed and  $j_{iT_i}$  the last age when he is observed. Hence we observe outcomes at ages  $j_i = j_{i0}, \dots, j_{iT_i}$ .

We first start with discrete outcomes which are absorbing states (e.g. disease diagnostic, mortality, benefit claiming). Record as  $h_{i,j_i,m} = 1$  if the individual outcome  $m$  has occurred as of age  $j_i$ . We assume the individual-specific component of the hazard can be decomposed in a time invariant and variant part. The time invariant part is composed of the effect of observed characteristics  $x_i$  that are constant over the entire life course and initial conditions  $h_{i,j_0,-m}$  (outcomes other than the outcome  $m$ ) that are determined before the first age in which each individual is observed <sup>1</sup>. The time-varying part is the effect of previously diagnosed outcomes  $h_{i,j_i-1,-m}$ , on the hazard for  $m$ .<sup>2</sup> We assume an index of the form  $z_{m,j_i} = x_i\beta_m + h_{i,j_i-1,-m}\gamma_m + h_{i,j_0,-m}\psi_m$ . Hence, the latent component of the hazard is modeled as

$$h_{i,j_i,m}^* = x_i\beta_m + h_{i,j_i-1,-m}\gamma_m + h_{i,j_0,-m}\psi_m + a_{m,j_i} + \varepsilon_{i,j_i,m}, \quad (1)$$

$$m = 1, \dots, M_0, j_i = j_{i0}, \dots, j_{iT_i}, i = 1, \dots, N$$

The term  $\varepsilon_{i,j_i,m}$  is a time-varying shock specific to age  $j_i$ . We assume that this last shock is normally distributed and uncorrelated across diseases. We approximate  $a_{m,j_i}$  with an age spline. After several specification checks, knots at age 65 and 75 appear to provide the best fit. This simplification is made for computational reasons since the joint estimation with unrestricted age fixed effects for each condition would imply a large number of parameters. The absorbing outcome, conditional on being at risk, is defined as

$$h_{i,j_i,m} = \max\{I(h_{i,j_i,m}^* > 0), h_{i,j_i-1,m}\}$$

<sup>1</sup>Section 9.1 explains why the  $h_{i,j_0,-m}$  terms are included.

<sup>2</sup>With some abuse of notation,  $j_i - 1$  denotes the previous age at which the respondent was observed.

The occurrence of mortality censors observation of other outcomes in a current year. Mortality is recorded from exit interviews.

A number of restrictions are placed on the way feedback is allowed in the model. Table 7 documents restrictions placed on the transition model. We also include a set of other controls. A list of such controls is given in Table 8 along with descriptive statistics.

We have three other types of outcomes:

1. First, we have binary outcomes which are not an absorbing state, such as living in a nursing home. We specify latent indices as in (1) for these outcomes as well but where the lag dependent outcome also appears as a right-hand side variable. This allows for state-dependence.
2. Second, we have ordered outcomes. These outcomes are also modeled as in (1) recognizing the observation rule is a function of unknown thresholds  $\varsigma_m$ . Similarly to binary outcomes, we allow for state-dependence by including the lagged outcome on the right-hand side.
3. The third type of outcomes we consider are censored outcomes, earnings and financial wealth. Earnings are only observed when individuals work. For wealth, there are a non-negligible number of observations with zero and negative wealth. For these, we consider two part models where the latent variable is specified as in (1) but model probabilities only when censoring does not occur. In total, we have  $M$  outcomes.

The parameters  $\theta_1 = \left( \{\beta_m, \gamma_m, \psi_m, \varsigma_m\}_{m=1}^M \right)$ , can be estimated by maximum likelihood. Given the normality distribution assumption on the time-varying unobservable, the joint probability of all time-intervals until failure, right-censoring or death conditional on the initial conditions  $h_{i,j_0,-m}$  is the product of normal univariate probabilities. Since these sequences, conditional on initial conditions, are also independent across diseases, the joint probability over all disease-specific sequences is simply the product of those probabilities.

For a given respondent observed from initial age  $j_{i0}$  to a last age  $j_{Ti}$ , the probability of the observed health history is (omitting the conditioning on covariates for notational simplicity)

$$l_i^{-0}(\theta; h_{i,j_{i0}}) = \left[ \prod_{m=1}^{M-1} \prod_{j=j_{i1}}^{j_{Ti}} P_{ij,m}(\theta)^{(1-h_{ij-1,m})(1-h_{ij,M})} \right] \times \left[ \prod_{j=j_{i1}}^{j_{Ti}} P_{ij,M}(\theta) \right]$$

We use the  $-0$  superscript to make explicit the conditioning on  $\mathbf{h}_{i,j_{i0}} = (h_{i,j_{i0},0}, \dots, h_{i,j_{i0},M})'$ . We have limited information on outcomes prior to this age. The likelihood is a product of  $M$  terms with the  $m$ th term containing only  $(\beta_m, \gamma_m, \psi_m, \varsigma_m)$ . This allows the estimation to be done separately for each outcome.

#### 4.1.1 Inverse Hyperbolic Sine Transformation

One problem fitting the wealth and earnings distribution is that they have a long right tail and wealth has some negative values. We use a generalization of the inverse hyperbolic sine transform (IHT) presented in MacKinnon and Magee (1990). First denote the variable of interest  $y$ . The hyperbolic sine transform is

$$y = \sinh(x) = \frac{\exp(x) - \exp(-x)}{2} \tag{2}$$

The inverse of the hyperbolic sine transform is

$$x = \sinh^{-1}(y) = h(y) = \log(y + (1 + y^2)^{1/2})$$

Consider the inverse transformation. We can generalize such transformation, first allowing for a shape parameter  $\theta$ ,

$$r(y) = h(\theta y)/\theta \quad (3)$$

Such that we can specify the regression model as

$$r(y) = x\beta + \varepsilon, \varepsilon \sim N(0, \sigma^2) \quad (4)$$

A further generalization is to introduce a location parameter  $\omega$  such that the new transformation becomes

$$g(y) = \frac{h(\theta(y + \omega)) - h(\theta\omega)}{\theta h'(\theta\omega)} \quad (5)$$

where  $h'(a) = (1 + a^2)^{-1/2}$ .

We specify (4) in terms of the transformation  $g$ . The shape parameters can be estimated from the concentrated likelihood for  $\theta, \omega$ . We can then retrieve  $\beta, \sigma$  by standard OLS.

Upon estimation, we can simulate

$$\tilde{g} = x\hat{\beta} + \sigma\tilde{\eta}$$

where  $\eta$  is a standard normal draw. Given this draw, we can retransform using (5) and (2)

$$\begin{aligned} h(\theta(y + \omega)) &= \theta h'(\theta\omega)\tilde{g} + h(\theta\omega) \\ \tilde{y} &= \frac{\sinh[\theta h'(\theta\omega)\tilde{g} + h(\theta\omega)] - \theta\omega}{\theta} \end{aligned}$$

## 4.2 Quality adjusted life years

As an alternative measure of life expectancy, we compute a quality adjusted life year (QALY) based on the EQ-5D instrument, a widely-used health-related quality-of-life (HRQoL) measure<sup>3</sup>. The scoring system for EQ-5D was first developed by Dolan (1997) using a UK sample. Later, a scoring system based on a US sample was generated (Shaw et al., 2005). The HRS does not ask the appropriate questions for computing EQ-5D, but the MEPS does. We use a crosswalk from MEPS to compute EQ-5D scores for HRS respondents not living in a nursing home<sup>4</sup>.

The FEM has a more limited specification of functional status than what is available in the HRS. In order to predict HRQoL for the FEM simulation sample, we needed to build a bridge between the FEM-type functional status and the predicted EQ-5D score in HRS. We used ordinary least squares to model the EQ-5D score predicted for non-nursing home in the 1998 HRS as a function of the six chronic conditions and the FEM-specification of functional status, The results are shown in Table 16.

The EQ-5D scoring method is based on a community population. Following a suggestion by Emmett Keeler, if a person is living in a nursing home, the QALY is reduced by 10%. We used the parameter estimates in Table 16 to predict EQ-5D scores for the entire FEM simulation sample and reduced nursing home residents' score by 10%. The resulting scores are representative of the U.S population (both in community and in nursing homes) ages 51 and over. Table 17 summarizes the EQ-5D score using this model for the stock FEM simulation sample in 2004.

<sup>3</sup>Section 9.2.1 gives some background on HRQoL measures.

<sup>4</sup>Section 9.2.2 describes EQ-5D in MEPS. Details of the crosswalk model development are given in 9.2.3.



## 5 Model for new cohorts

We first discuss the empirical strategy, then present the model and estimation results. The model for new cohorts integrates information coming from trends among younger cohorts with the joint distribution of outcomes in the current population of age 51 respondents in the HRS.

### 5.1 Information available and empirical strategy

For the transition model, we need to first to obtain outcomes listed in Table 18. Ideally, we need information on

$$f_t(y_{i1}, \dots, y_{iM}) = f_t(\mathbf{y}_i)$$

where  $t$  denotes calendar time, and  $\mathbf{y}_i = (y_{i1}, \dots, y_{iM})$  is a vector of outcomes of interest whose probability distribution at time  $t$  is  $f_t(\cdot)$ . Information on how the joint distribution evolves over time is not available. Trends in conditional distributions are rarely reported either.

Generally, we have (from published or unpublished sources) good information on trends for some moments of each outcome (say a mean or a fraction). That is, we have information on  $g_{t,m}(y_{im})$ , where  $g_{t,m}(\cdot)$  denotes the marginal probability distribution of outcome  $m$  at time  $t$ .

For example, we know from the NHIS repeated cross-sections that the fraction obese is increasing by roughly 2% a year among 51 year olds. In statistical jargon this means we have information on how the mean of the marginal distribution of  $y_{im}$ , an indicator variable that denotes whether someone is obese, is evolving over time.

We also have information on the joint distribution at one point in time, say year  $t_0$ . For example, we can estimate the joint distribution on age 51 respondents in the 1992 wave of the HRS,  $f_{t_0}(\mathbf{y}_i)$ .

We make the assumption that only some part of  $f_t(\mathbf{y}_i)$  evolves over time. In particular, we will model the marginal distribution of each outcome allowing for correlation across these marginals. The correlations will be assumed fixed while the mean of the marginals will be allowed to change over time.

### 5.2 Model and estimation

Assume the latent model for  $\mathbf{y}_i^* = (y_{i1}^*, \dots, y_{iM}^*)'$ ,

$$\mathbf{y}_i^* = \boldsymbol{\mu} + \boldsymbol{\varepsilon}_i,$$

where  $\boldsymbol{\varepsilon}_i$  is normally distributed with mean zero and covariance matrix  $\boldsymbol{\Omega}$ . It will be useful to write the model as

$$\mathbf{y}_i^* = \boldsymbol{\mu} + \mathbf{L}_\Omega \boldsymbol{\eta}_i,$$

where  $\mathbf{L}_\Omega$  is a lower triangular matrix such that  $\mathbf{L}_\Omega \mathbf{L}'_\Omega = \boldsymbol{\Omega}$  and  $\boldsymbol{\eta}_i = (\eta_{i1}, \dots, \eta_{iM})'$  are standard normal. We observe  $y_i = \Gamma(y_i^*)$  which is a non-invertible mapping for a subset of the  $M$  outcomes. For example, we have binary, ordered and censored outcomes for which integration is necessary.

The vector  $\boldsymbol{\mu}$  can depend on some variables which have a stable distribution over time  $\mathbf{z}_i$  (say race, gender and education). This way, estimation preserves the correlation with these outcomes without having to estimate their correlation with other outcomes. Hence, we can write

$$\boldsymbol{\mu}_i = \mathbf{z}_i \boldsymbol{\beta}$$

and the whole analysis is done conditional on  $\mathbf{z}_i$ .

For binary and ordered outcomes, we fix  $\Omega_{m,m} = 1$  which fixes the scale. Also we fix the location of the ordered models by fixing thresholds as  $\tau_0 = -\infty$ ,  $\tau_1 = 0$ ,  $\tau_K = +\infty$ , where  $K$  denotes the number of categories for a particular outcome. We also fix to zero the correlation between selected outcomes (say earnings) and their selection indicator. Hence, we consider two-part models for these outcomes. Because some parameters are naturally bounded, we also re-parameterize the problem to guarantee an interior solution. In particular, we parameterize

$$\begin{aligned}\Omega_{m,m} &= \exp(\delta_m), \quad m = m_0 - 1, \dots, M \\ \Omega_{m,n} &= \tanh(\xi_{m,n}) \sqrt{\Omega_{m,m} \Omega_{m,n}}, \quad m, n = 1, \dots, N \\ \tau_{m,k} &= \exp(\gamma_{m,k}) + \tau_{k-1}, \quad k = 2, \dots, K_m - 1, m \text{ ordered}\end{aligned}$$

and estimate the  $(\delta_{m,m}, \xi_{m,n}, \gamma_k)$  instead of the original parameters. The parameter values are estimated using the *cmp* package in Stata (Roodman, 2011). Table 19 gives parameter estimates for the indices while Table 20 gives parameter estimates of the covariance matrix in the outcomes.

To apply trends to the future cohorts, the latent model is written as

$$\mathbf{y}_i^* = \boldsymbol{\mu} + \mathbf{L}_\Omega \boldsymbol{\eta}_i.$$

Each marginal has a mean change equal to  $E(\mathbf{y} \mid \boldsymbol{\mu}) = (1 + \tau)g(\boldsymbol{\mu})$ , where  $\tau$  is the percent change in the outcome and  $g()$  is a non-linear but monotone mapping. Since it is invertible, we can find the vector  $\boldsymbol{\mu}^*$  where  $\boldsymbol{\mu}^* = g^{-1}(E(\mathbf{y} \mid \boldsymbol{\mu})/(1 + \tau))$ . We use these new intercepts to simulate new outcomes.

## 6 Government revenues and expenditures

This gives a limited overview of how revenues and expenditures of the government are computed. These functions are based on 2004 rules, but we include predicted changes in program rules such changes based on year of birth (e.g. Normal retirement age).

We cover the following revenues and expenditures:

| <b>Revenues</b>             | <b>Expenditures</b>                 |
|-----------------------------|-------------------------------------|
| Federal Income Tax          | Social Security Retirement benefits |
| State and City Income Taxes | Social Security Disability benefits |
| Social Security Payroll Tax | Supplementary Security Income (SSI) |
| Medicare Payroll Tax        | Medical Care Costs                  |
| Property Tax                | Medicaid                            |
|                             | Medicare (parts A, B, and D)        |

### 6.1 Social Security benefits

Workers with 40 quarters of coverage and of age 62 are eligible to receive their retirement benefit. The benefit is calculated based on the Average Indexed Monthly Earnings (AIME) and the age at which benefits are first received. If an individual claims at his normal retirement age (NRA) (65 for those born prior to 1943, 66 for those between 1943 and 1957, and 67 thereafter), he receives his Primary Insurance Amount (PIA) as a monthly benefit. The PIA is a piece-wise linear function of the AIME. If a worker claims prior to his NRA, his benefit is lower than his PIA. If he retires after the NRA, his benefit is higher. While receiving benefits, earnings are taxed above a certain

earning disregard level prior to the NRA. An individual is eligible to half of his spouses PIA, properly adjusted for the claiming age, if that is higher than his/her own retirement benefit. A surviving spouse is eligible to the deceased spouses PIA. Since we assume prices are constant in our simulations, we do not adjust benefits for the COLA (Cost of Living Adjustment) which usually follows inflation. We however adjust the PIA bend points for increases in real wages.

## 6.2 Disability Insurance benefits

Workers with enough quarters of coverage and under the normal retirement age are eligible for their PIA (no reduction factor) if they are judged disabled (which we take as the predicted outcome of DI receipt) and earnings are under a cap called the Substantial Gainful Activity (SGA) limit. This limit was \$9720 in 2004. We ignore the 9 month trial period over a 5 year window in which the SGA is ignored.

## 6.3 Supplemental Security Income benefits

Self-reported receipt of supplemental security income (SSI) in the HRS provides estimates of the proportion of people receiving SSI under what administrative data would suggest. To correct for this bias, we link the HRS with administrative data from the social security administration identifying those receiving SSI. In the linked administrative data, 3.96% of the population receives supplementary security income, while only 2.79% of the sample reports social security income. We therefore estimate a probit of receiving SSI as a function of self-reporting social security income, as well as demographic, health, and wealth.

The benefit amount is taken from the average monthly benefits found in the 2004 Social Security Annual Statistical Supplement. We assign monthly benefit of \$450 for person aged 51 to 64, and \$350 for persons aged 65 and older.

## 6.4 Medical costs estimation

In the FEM, a cost module links a person's current state—demographics, economic status, current health, risk factors, and functional status to 4 types of individual medical spending. The FEM models: total medical spending (medical spending from all payment sources), Medicare spending<sup>5</sup>, Medicaid spending (medical spending paid by Medicaid), and out of pocket spending (medical spending by the respondent). These estimates are based on pooled weighted least squares regressions of each type of spending on risk factors, self-reported conditions, and functional status, with spending inflated to constant dollars using the medical component of the consumer price index. We use the 2000-2010 Medical Expenditure Panel Survey for these regressions for persons not Medicare eligible, and the 2000-2010 Medicare Current Beneficiary Survey for spending for those that are eligible for Medicare. Those eligible for Medicare include people eligible due to age (65+) or due to disability status. Comparisons of prevalences and question wording across these different sources are provided in Tables 1 and 2, respectively.

In the baseline scenario, this spending estimate can be interpreted as the resources consumed by the individual given the manner in which medicine is practiced in the United States during the post-part D era (2006-2010). Models are estimated for total, Medicaid, out of pocket spending, and for the Medicare spending. These estimates only use the MCBS dataset.

---

<sup>5</sup>We estimate annual medical spending paid by specific parts of Medicare (Parts A, B, and D) and sum to get the total Medicare expenditures.

Since Medicare spending has numerous components (Parts A and B are considered here), models are needed to predict enrollment. In 2004, 98.4% of all Medicare enrollees, and 99%+ of aged enrollees, were in Medicare Part A, and thus we assume that all persons eligible for Medicare take Part A. We use the 2007-2010 MCBS to model take up of Medicare Part B for both new enrollees into Medicare, as well as current enrollees without Part B. Estimates are based on weighted probit regression on various risk factors, demographic, and economic conditions. The HRS starting population for the FEM does not contain information on Medicare enrollment. Therefore another model of Part B enrollment for all persons eligible for Medicare is estimated via a probit, and used in the first year of simulation to assign initial Part B enrollment status. Estimation results are shown in estimates table. The MCBS data over represents the portion enrolled in Part B, having a 97% enrollment rate in 2004 instead of the 93.5% rate given by Medicare Trustee's Report. In addition to this baseline enrollment probit, we apply an elasticity to premiums of -0.10, based on the literature and simulation calibration for actual uptake through 2009 (Atherly et al., 2004; Buchmueller, 2006). The premiums are computed using average Part B costs from the previous time step and the means-testing thresholds established by the ACA.

Since both the MEPS and MCBS are known to under-predict medical spending (see, e.g., Selden and Sing, 2008, and references therein), we applied adjustment factors to the predicted three types of individual medical spending so that the predicted per-capita spending in FEM equal the corresponding spending in National Health Expenditure Accounts (NHEA) for age group 55-64 in year 2004 and ages 65 and over in year 2010, respectively. Table 21 shows how these adjustment factors were determined by using the ratio of expenditures in the NHEA to expenditures predicted in the FEM.

Since 2006, the Medicare Current Beneficiaries Survey (MCBS) contains data on Medicare Part D. The data gives the capitated Part D payment and enrollment. When compared to the summary data presented in the CMS 2007 Trustee Report, the 2006 per capita cost is comparable between the MCBS and the CMS. However, the enrollment is underestimated in the MCBS, 53% compared to 64.6% according to CMS.

A cross-sectional probit model is estimated using years 2007-2010 to link demographics, economic status, current health, and functional status to Part D enrollment - see the estimates table. To account for both the initial under reporting of Part D enrollment in the MCBS, as well as the CMS prediction that Part D enrollment will rise to 75% by 2012, the constant in the probit model is increased by 0.22 in 2006, to 0.56 in 2012 and beyond. The per capita Part D cost in the MCBS matches well with the cost reported from CMS. An OLS regression using demographic, current health, and functional status is estimated for Part D costs based on capitated payment amounts.

The Part D enrollment and cost models are implemented in the Medical Cost module. The Part D enrollment model is executed conditional on the person being eligible for Medicare, and the cost model is executed conditional on the enrollment model leading a true result, after the Monte Carlo decision. Otherwise the person has zero Part D cost. The estimated Part D costs are added with Part A and B costs to obtain total Medicare cost, and any medical cost growth assumptions are then applied.

## 6.5 Taxes

We consider Federal, State and City taxes paid at the household level. We also calculate Social Security taxes and Medicare taxes. HRS respondents are linked to their spouse in the HRS simulation. We take program rules from the OECD's Taxing Wages Publication for 2004. Households have basic and personal deductions based on marital status and age (>65). Couples are assumed

to file jointly. Social Security benefits are partially taxed. The amount taxable increases with other income from 50% to 85%. Low income elderly have access to a special tax credit and the earned income tax credit is applied for individuals younger than 65. We calculate state and city taxes for someone living in Detroit, Michigan. The OECD chose this location because it is generally representative of average state and city taxes paid in the U.S. Since Social Security administrative data cannot be used jointly with Geocoded information in the HRS, we apply these hypothetical taxes to all respondents.

At the state level, there is a basic deduction for each member of the household (\$3,100) and taxable income is taxed at a flat rate of 4%. At the city level, there is a small deduction of \$750 per household member and the remainder is taxed at a rate of 2.55%. There is however a tax credit that decreases with income (20% on the first 100\$ of taxes paid, 10% on the following 50\$ and 5% on the remaining portion).

We calculate taxes paid by the employee for Old-Age Social Insurance (SS benefits and DI) and Medicare (Medicaid and Medicare). It does not include the equivalent portion paid by the employer. OASI taxes of 6.2% are levied on earnings up to \$97,500 (2004 cap) while the Medicare tax (1.45%) is applied to all earnings.

## 7 Scenarios and robustness

### 7.1 Obesity reduction scenario

In addition to the status quo scenario, the Future Elderly Model can be used to estimate the effects of numerous possible policy changes. One such set of policy simulations involves changing the trends of risk factors for chronic conditions. This is implemented by altering the incoming cohorts. A useful example is an obesity reduction scenario which rolls back the prevalence of obesity among 50 year-olds to its 1978 level by 2030, where it remains until the end of the scenario, in 2050. This is accomplished by reversing the annual rates of change for BMI category, hypertension, and diabetes shown in Table 5. As seen in Table 23, this will change the prevalence of obesity among the age 50+ in 2050. As compared with the status quo estimates (Table 22) the FEM predicts that by 2050, this will result in a change in the amount of Social Security benefits as well as changing combined Medicare and Medicaid expenditures.

## 8 Implementation

The FEM is implemented in multiple parts. Estimation of the transition and cross sectional models is performed in Stata. The incoming cohort model is estimated in Stata using the CMP package (Roodman, 2011). The simulation is implemented in C++ to increase speed.

To match the two year structure of the Health and Retirement Study (HRS) data used to estimate the transition models, the FEM simulation proceeds in two year increments. The end of each two year step is designed to occur on July 1st to allow for easier matching to population forecasts from Social Security. A simulation of the FEM proceeds by first loading a population representative of the age 51+ US population in 2004, generated from HRS. In two year increments, the FEM applies the transition models for mortality, health, working, wealth, earnings, and benefit claiming with Monte Carlo decisions to calculate the new states of the population. The population is also adjusted by immigration forecasts from the US Census Department, stratified by race and age. If incoming cohorts are being used, the new 51/52 year olds are added to the population. The

number of new 51/52 year olds added is consistent with estimates from the Census, stratified by race. Once the new states have been determined and new 51/52 year olds added, the cross sectional models for medical costs, and calculations for government expenditures and revenues are performed. Summary variables are then computed. Computation of medical costs includes the persons that died to account for end of life costs. Other computations, such as Social Security benefits and government tax revenues, are restricted to persons alive at the end of each two year interval. To eliminate uncertainty due to the Monte Carlo decision rules, the simulation is performed multiple times (typically 100), and the mean of each summary variable is calculated across repetitions.

FEM simulation takes as inputs assumptions regarding growth in the national wage index, normal retirement age, real medical cost growth, interest rates, cost of living adjustments, the consumer price index, significant gainful activity, and deferred retirement credit. The default assumptions are taken from the 2010 Social Security Intermediate scenario, adjusted for no price increases after 2010. Therefore simulation results are in real 2009 dollars. Table 24 shows the assumptions for each calendar year and Table 25 shows assumptions for each birth year.

Different simulation scenarios are implemented by changing any of the following components: incoming cohort model, transition models, interventions that adjust the probabilities of specific transition, and changes to assumptions on future economic conditions.

## 8.1 Intervention Module

The intervention module can adjust characteristics of individuals when they are first read into the simulation “init\_interventions” or alter transitions within the simulation “interventions.” At present, init\_interventions can act on chronic diseases, ADL/IADL status, program participation, and some demographic characteristics. Interventions within the simulation can currently act on mortality, chronic diseases, and some program participation variables.

Interventions can take several forms. The most commonly used is an adjustment to a transition probability. One can also delay the assignment of a chronic condition or cure an existing chronic condition. Additional flexibility comes from selecting who is eligible for the intervention. Some examples might help to make the interventions concrete.

- Example 1: Delay the enrollment into Social Security OASI by two years. In this scenario claiming of Social Security benefits is transitioned as normal. However, if a person is predicted to claim their benefits, then that status is not immediately assigned, but is instead assigned two years later.
- Example 2: Cure hypertension for those with no other chronic diseases. In this scenario any individual with hypertension (including those who have had hypertension for many years) is cured (hypertension status is set to 0), as long as they do not have other chronic diseases. This example uses the individuals chronic disease status as the eligibility criteria for the intervention.
- Example 3: Reduce the incidence of hypertension for half of men aged 55 to 65 by 10% in the first year of the simulation, gradually increasing the reduction to 20% after 10 years. This example begins to show the flexibility in the intervention module. The eligibility criteria are more complex (half of men in a specific age range are eligible) and the intervention changes over time. Mathematically, the intervention works by acting on the incidence probability,  $\rho$ . In the first year of the simulation, the probability is replaced by  $(1 - 0.5 * 0.1) \rho = 0.95\rho$ . The binary outcome is then assigned based on this new probability. Thus, at the population level,

there is a 5% reduction in incidence for men aged 55 to 65, as desired. After 10 years, the probability for this eligible population becomes  $(1 - 0.5 * 0.2) \rho = 0.9\rho$ .

More elaborate interventions can be programmed by the user.

## 9 Model development

This section gives some historical background about decisions and developments that led up to the current state of the FEM.

### 9.1 Transition model

Section 4.1 describes the current FEM transition model with a focus on discrete absorbing outcomes. In developing this model, it was previously assumed that the time invariant part of the hazard was composed of the effect of observed characteristics  $x_i$  and permanent unobserved characteristics specific to outcome  $m$ ,  $\eta_{i,m}$ . Consequently, the index was assumed to be of the form  $z_{m,j_i} = x_i\beta_m + h_{i,j_i-1,-m}\gamma_m + \eta_{i,m}$  and the latent component of the hazard was modeled as

$$h_{i,j_i,m}^* = x_i\beta_m + h_{i,j_i-1,-m}\gamma_m + \eta_{i,m} + a_{m,j_i} + \varepsilon_{i,j_i,m}, \quad (6)$$

$$m = 1, \dots, M_0, j_i = j_{i0}, \dots, j_{i,T_i}, i = 1, \dots, N$$

This is the same as (1), except that (6) uses unobserved characteristics  $\eta_{i,m}$  instead of the effects of observed initial conditions  $h_{i,j_0,-m}\psi_m$ . The unobserved effects  $\eta_{i,m}$  are persistent over time and were allowed to be correlated across diseases  $m = 1, \dots, M$ . We assumed that these effects had a normal distribution with covariance matrix  $\Omega_\eta$ .

The parameters  $\theta_1 = \left( \{\beta_m, \gamma_m, \varsigma_m\}_{m=1}^M, \text{vech}(\Omega_\eta) \right)$ , could be estimated by maximum simulated likelihood. The joint probability, conditional on the individual frailty is the product of normal univariate probabilities. Similar to the joint probability in Section 4.1, these sequences, conditional on unobserved heterogeneity, are also independent across diseases. The joint probability over all disease-specific sequences is simply the product of those probabilities.

For a given respondent with frailty  $\eta_i$ , the probability of the observed health history is (again, omitting the conditioning on covariates for simplicity)

$$l_i^{-0}(\theta; \eta_i, h_{i,j_{i0}}) = \left[ \prod_{m=1}^{M-1} \prod_{j=j_{i1}}^{j_{T_i}} P_{ij,m}(\theta; \eta_i)^{(1-h_{ij-1,m})(1-h_{ij,M})} \right] \times \left[ \prod_{j=j_{i1}}^{j_{T_i}} P_{ij,M}(\theta; \eta_i) \right]$$

To obtain the likelihood of the parameters given the observables, it is necessary to integrate out unobserved heterogeneity. The complication is that  $h_{i,j_{i0},-m}$ , the initial outcomes in each hazard, are not likely to be independent of the common unobserved heterogeneity term which needs to be integrated out. A solution is to model the conditional probability distribution  $p(\eta_i | \mathbf{h}_{i,j_{i0}})$  (Wooldridge, 2000). Implementing this solution amounts to including initial outcomes at baseline (age 50) for each hazard. This is equivalent to writing

$$\begin{aligned} \eta_i &= \Gamma h_{i0} + \alpha_i \\ \alpha_i &\sim N(0, \Omega_\alpha) \end{aligned}$$

Therefore, this allows for permanent differences in outcomes due to differences in baseline outcomes. The likelihood contribution for one respondent’s sequence is therefore given by

$$l_i(\theta, \mathbf{h}_{i,j_{i0}}) = \int l_i(\theta; \alpha_i, \mathbf{h}_{i,j_{i0}}) dF(\alpha_i) \quad (7)$$

This model was estimated using maximum simulated likelihood. The likelihood contribution (7) was replaced with a simulated counterpart based on  $R$  draws from the distribution of  $\alpha$ . The BFGS algorithm was then used to optimize over this simulated likelihood. Convergence of the joint estimator could not be obtained, so the distribution of  $\alpha_i$  was assumed to be degenerate. This yielded the simpler estimation problem describe in Section 4.1, where each equation is estimated separately.

## 9.2 Quality adjusted life years

### 9.2.1 Health related quality-of-life measures

In general, HRQoL measures summarize population health by a single preference-based index measure. A HRQoL measure is a suitable measure of QALY. There are several widely-used generic HRQoL indexes, each involving a standard descriptive system: a multidimensional measure of health states and a corresponding scoring system to translate the descriptive system into a single index (Fryback et al., 2007). The scoring system is developed based on a community survey of preference valuation of health states in the descriptive system, using utility valuation methods like time trade-offs or a standard gamble.

### 9.2.2 Health related quality-of-life in MEPS

Because the health states measures in the HRS and FEM do not match the health states defined in any of the currently available HRQoL indexes, we used MEPS to create a crosswalk file for HRQoL index calculation. MEPS collects information on health care cost and utilization, demographics, functional status, and medical conditions. Since the year 2000, it initiated a self-administered questionnaire for two sets of instruments: SF-12 and EQ-5D.

Seven of the twelve SF-12 questions can be used to generate another HRQoL index: SF-6D. However, the scoring system for SF-6D was derived from a UK sample (Brazier and Roberts, 2004) and a significant proportion of the MEPS sample did not give valid answer for at least one of the seven questions. Therefore, we decided to calculate EQ-5D index score as the HRQoL measure for FEM.

The EQ-5D instrument includes 5 questions about the extent of problems in mobility, self-care, daily activities, pain, and anxiety/depression. The scoring system for EQ-5D was first developed by Dolan (1997) using a UK sample. Later, a scoring system based on a US sample was generated (Shaw et al., 2005). In MEPS 2001, there are 8,301 respondents aged 51 and over. Of those respondents, 7,439 gave valid answers for all of the five EQ-5D questions. We calculated EQ-5D scores for these respondents using the scoring algorithm based on a US sample (Shaw et al., 2005). The distribution of EQ-5D index scores among these respondents is shown in Figure 2.

### 9.2.3 MEPS-HRS Crosswalk development

The functional status measure in FEM is based on the HRS. It is a categorical variable including the following mutually exclusive categories: healthy, any IADL limitation (no ADL limitations), 1-2



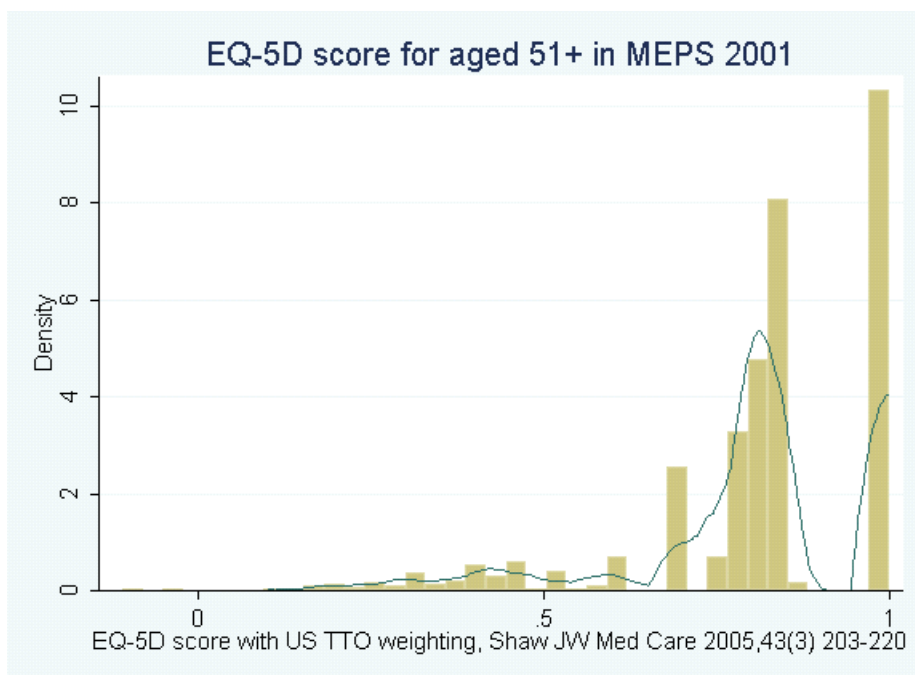

Figure 2: Distribution of EQ-5D index scores for ages 51+ in 2001 MEPS

ADL limitations, and 3 or more ADL limitations. Unfortunately the measures of IADL and ADL limitations in MEPS are quite different. HRS asks questions like “Do you have any difficulty in ...”, while MEPS asks questions like “Does ...help or supervision in ...” As Table 13 shows, the prevalence of IADL limitations is relatively similar between the two surveys, while the prevalence of ADL limitations is much higher in HRS, relative to MEPS. This is reasonable since not all who have difficulty in ADLs receive help or supervision.

In order to compute EQ-5D index scores using functional status in the FEM, we needed a set of functional status measures that is comparable across MEPS and HRS (the host dataset for FEM). We explored several options for deriving such a measure. Ultimately, we constructed two measures. One measure indicates physical function limitation while the other measure indicates IADL limitation.

In MEPS, physical function limitation indicates that at least one of the following is true: 1) receiving help or supervision with bathing, dressing or walking around the house; 2) being limited in work/housework; 3) having difficulty walking, climbing stairs, grasping objects, reaching overhead, lifting, bending or stooping, or standing for long periods of time; or 4) having difficulty in hearing or vision. In HRS, physical function limitation indicates that at least one of the following is true: 1) having any difficulty in bathing/dressing/eating/walking across the room/getting out of bed; 2) limited in work/housework; or 3) limited in any other activities.

In MEPS, IADL limitation indicates receiving help or supervision using the telephone, paying bills, taking medications, preparing light meals, doing laundry, or going shopping. In HRS, IADL limitation indicates having difficulty in any IADL such as using the phone, managing money, or taking medications.

The prevalence of our two constructed measures among ages 51 and older in MEPS (2001) and HRS (1998) is shown in Table 14. The prevalences are quite similar across the two surveys.

Using MEPS 2001 data, we next use ordinary least squares to model the derived EQ-5D score as a function of six chronic conditions – which are available both in HRS and MEPS, our two constructed

measures of functional status, and an interaction term of the two measures of functional status. Three different models were considered. Estimation results are presented in Models I-III in Table 15. We also show the estimation results of using only IADL/ADL limitation as covariates, and using only the six chronic conditions as covariates, as Models IV and V in Table 15. Model II was used as the crosswalk described in Section 4.2 to calculate EQ-5D score for non-nursing home residents aged 51 and over in HRS 1998.

## **9.3 Drug Expenditures**

### **9.3.1 Drug Expenditures - MEPS**

AHRQ produces a file of consolidated annual expenditures for each Medical Expenditure Panel Survey respondent in each calendar year. The total drug expenditure variable sums all amounts paid out-of-pocket and by third party payers for each prescription purchased in that year. For comparison across years, we convert all amounts to 2010 dollars using the Medical CPI.

### **9.3.2 Drug Expenditures - MCBS**

The Medicare Current Beneficiary Survey produces a Prescribed Medicine Events file at the individual-event level, with cost and utilization of prescribed medicines for the MCBS community population. Collapsing this file to the individual provides an estimate of prescription drug cost for each person. For comparison across years, we convert all amounts to 2010 dollars using the Medical CPI.

There are two caveats to working with these data. The first caveat regards how to handle the "ghost" respondents. "Ghosts" are individuals who enroll in Medicare, but were not asked cost and use questions in the year of their enrollment. For some outcomes, such as medical expenditures, the MCBS makes an effort to impute. For others, such as drug utilization and expenditures, the MCBS does not. We imputed annual drug expenditures for the ghosts, but for certain age ranges the drug expenditures were not reasonable. This had the biggest effect on the 65 and 66 year olds, for two reasons. The first is that the 65 and 66 year olds are more likely to be ghosts, as 65 is the typical age of enrollment for Medicare. The second is that the 65 and 66 year olds used for imputation (i.e., the non-"ghosts") are different. To be fully present in MCBS at age 65 would require enrolling in Medicare before age 65, which happen through a different channel, such as qualifying for Medicare due to receiving disability benefits from the federal government.

The second caveat relates to the filling in zeroes for individuals with no utilization data, but who were enrolled. We assumed that individuals who were not ghosts and who did not appear on the Prescribed Medicine Events file had zero prescription expenditures.

### **9.3.3 Drug Expenditures - Estimation**

Due to the complexities of the age 65-66 population in the MCBS, we chose to estimate the drug expenditure models using the MEPS for individuals 51 to 66 and the MCBS for individuals 67 and older. Individuals under age 65 receiving Medicare due to disability are estimated separately. Since there are a number of individuals with zero expenditures, we estimate the models in two stages. The first stage is a probit predicting any drug expenditures and the second is an ordinary least squares model predicting the amount, conditional on any. Coefficient estimates and marginal effects are shown in the accompanying Excel workbook.

## 10 Validation

We perform three validation exercises:

1. Data splitting
2. External validation
3. External corroboration

Data splitting is a test of the simulations internal validity that compares simulated outcomes to actual outcomes, external validation compares model forecasts with actual outcomes from other data sources, and external corroboration compares model forecasts to others forecasts.

### 10.1 Data Splitting

The data-splitting exercise randomly samples half of the HRS respondent IDs for use in estimating the transition models. The respondents not used for estimation, but who were present in the HRS sample in 1998, are then simulated from 1998 through 2012. Demographic, health, and economic outcomes are compared between the simulated (FEM) and actual (HRS) populations. These results are presented in Table 9 - Table 12 for 2000, 2006, and 2012, with a statistical test of the difference between the average values in the two populations.

Worth noting is how the composition of the population changes in this exercise. In 1998, the sample represents those 51 and older. Since we follow a fixed cohort, the age of the population will increase to 65 and older in 2012. This has consequences for some measures in later years where the eligible population shrinks.

#### 10.1.1 Demographics

Demographic measures are presented in Table 10. Demographic differences between the two populations are small. The gender balance and fraction of the population that is non-Hispanic Black or Hispanic is consistent.

#### 10.1.2 Health Outcomes

The FEM population has a slightly higher population with one or more ADL limitation in 2012 (20.3% vs 18.1%). Those with any IADL limitations are not statistically different from one another in 2012.

The two populations are not statistically different from each other for prevalence of cancer, heart disease, hypertension, or stroke in 2012. They do differ for diabetes (25.4% for the FEM, 24.0% for the HRS), and lung disease (12.3% for the FEM, 11.2% for the HRS), though the practical significance of these differences is not clear.

#### 10.1.3 Health Risk Factors

Average BMI and smoking behavior are not statistically different between the two populations in 2012. The nursing home population is also not statistically different between the FEM and the HRS.

On the whole, the data-splitting exercise is reassuring. Comparing simulated outcomes to actual outcomes using a set of transition models estimated on a separate population reveals that the

majority of outcomes of interest are not statistically different. In cases where they are, the practical difference is potentially low.

## 10.2 External Validation

The external validation exercise compares FEM full population simulations beginning in 2004 to external sources. Here we focus on per capita benefits received from Social Security, Disability, and Supplemental Security Income, followed by Medicare and Medicaid.

### 10.2.1 Benefits from Social Security Administration

Conditional on a simulant receiving benefits, the FEM algorithmically assigns benefits for Old Age and Survivors, Supplemental Security Income, and Disability. Here, we compare simulation results to SSA figures.

For Old Age and Survivor benefits, we compare to the Social Security Administrations December 2012 Monthly Statistical Snapshot. Table 2 of that document indicates that the average OASI monthly benefit was \$1194. FEM forecasts \$1182 for the average beneficiary for 2012.

For Supplemental Security Income we compare to Table 3 of the December 2012 Monthly Statistical Snapshot, focusing on the 65 and older population, as that is the only category that is directly comparable. SSA reports that the average monthly benefit for December of 2012 was \$417. FEM assigns \$415 to those receiving SSI.

SSA does not report a disability figure that is directly comparable to FEM forecasts. However, SSA reports average Disability benefits by age, as well as the number of individuals receiving benefits at each age. This allows us to construct the average benefit for workers 51 and older. Based on this calculation, the average disabled worker 51 and older received a benefit of \$1212 in December of 2012. Spouses of disabled workers can also receive a benefit (SSA reports a benefit of \$304 for spouses of disabled workers for all ages). The 2012 FEM forecast for the average DI beneficiary, which includes both workers and their spouses, is \$1102.

### 10.2.2 Benefits from Medicare and Medicaid

For medical spending, we compare FEM forecasts in 2010 to National Health Expenditure Accounts measures from 2010, the most recent year for which these data are available. NHEA reports total amounts by age range, which we then convert to per capita measures using the 2010 Census. We focus on the 65-84 and 85 plus populations, as they are directly comparable to FEM forecasts. We also aggregate the two groups to produce a 65 plus average. FEM is similar to NHEA for the 65 plus population for Medicare (\$10473 for NHEA, \$10494 for FEM) and total medical spending (\$19265 for NHEA, \$19056 for FEM). FEM estimates are higher for Medicaid spending (\$2141 for NHEA, \$2818 for FEM).

## 10.3 External Corroboration

Finally, we compare FEM population forecasts to Census forecasts of the US population. Here, we focus on the full HRS population (51 and older) and those 65 and older. For this exercise, we begin the simulation in 2010 and simulate the full population through 2050. Population projections are compared to the 2012 Census projections for years 2012 through 2050. FEM population forecasts are always within two percent of Census forecasts.

## 11 Baseline Forecasts

In this section we present baseline forecasts of the Future Elderly Model. The figures show data from the HRS for the 55+ population from 1998 through 2012 and forecasts from the FEM for the 55+ population beginning in 2010.

### 11.1 Disease Prevalence

Figure 3 depicts the six chronic conditions we project for men. And Figure 4 depicts the historic and forecasted values for women.

Figure 5 shows historic and forecasted levels for any ADL difficulties, three or more ADL difficulties, any IADL difficulties, and two or more IADL difficulties for men 55 and older. Figure 6 shows historic and forecasted levels for any ADL difficulties, three or more ADL difficulties, any IADL difficulties, and two or more IADL difficulties for women 55 and older.

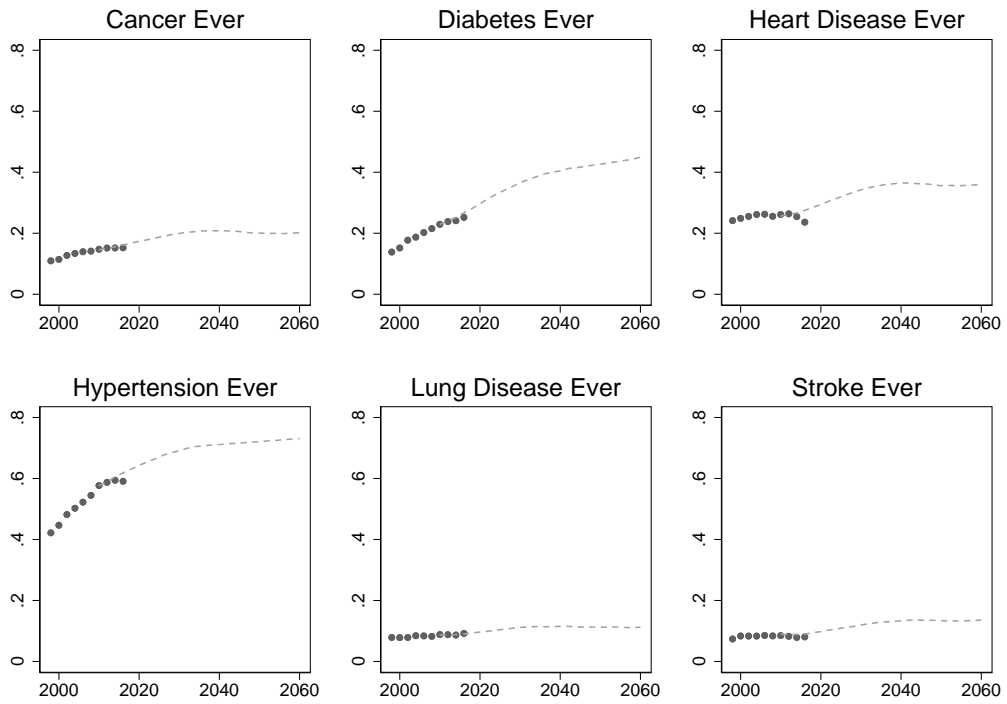

Figure 3: Historic and Forecasted Chronic Disease Prevalence for Men 55+

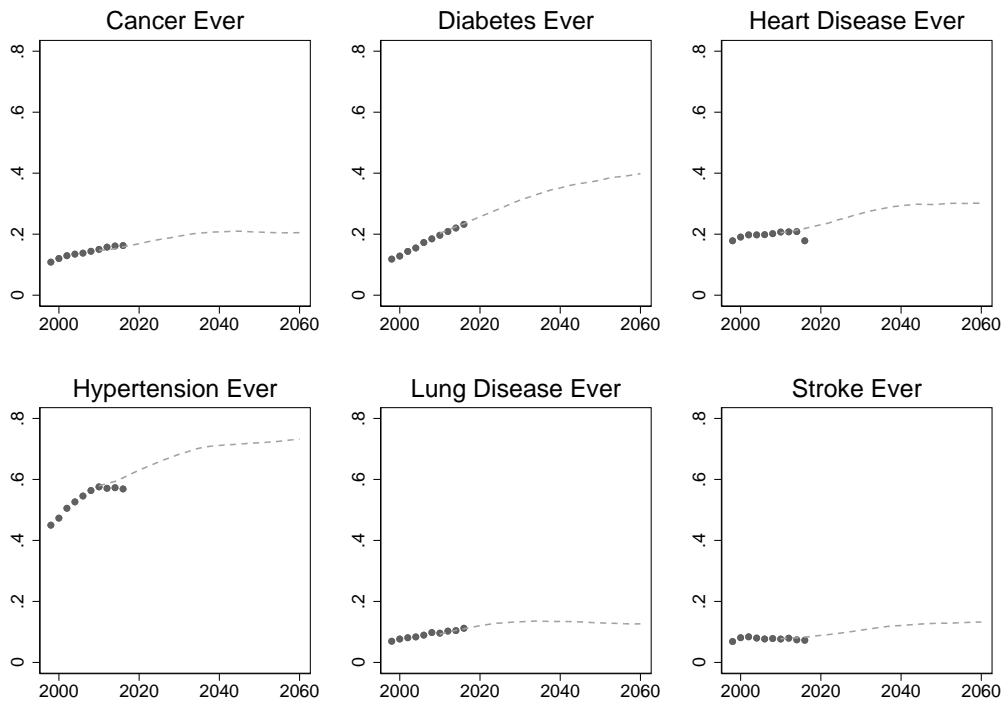

Figure 4: Historic and Forecasted Chronic Disease Prevalence for Women 55+

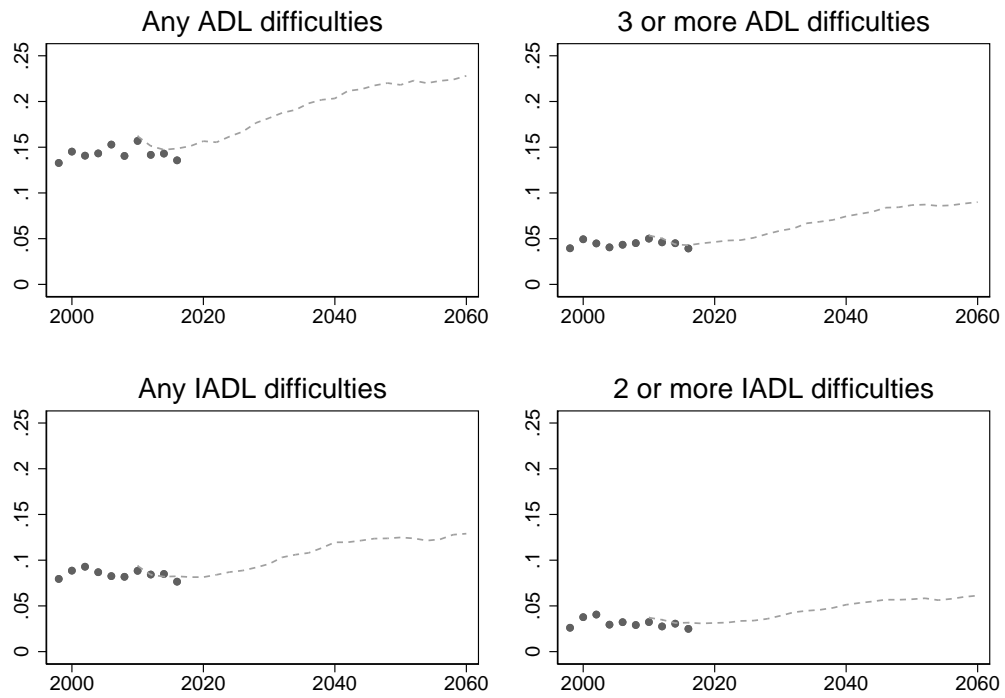

Figure 5: Historic and Forecasted ADL and IADL Prevalence for Men 55+

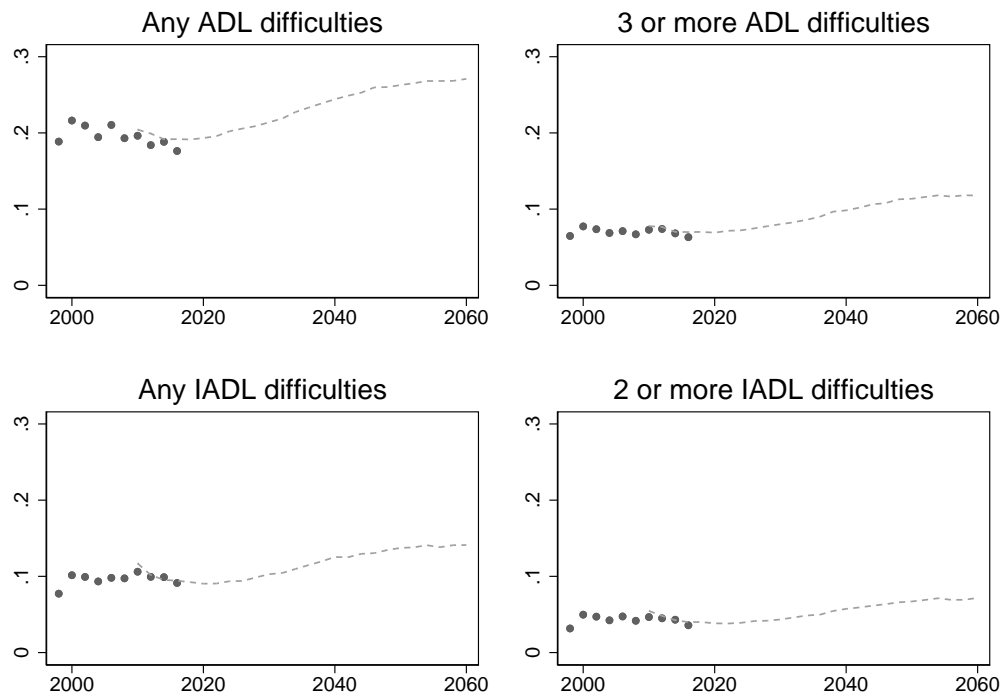

Figure 6: Historic and Forecasted ADL and IADL Prevalence for Women 55+

## 12 Acknowledgments

The Future Elderly Model has been developed by a large team over the last decade. Jay Bhattacharya, Eileen Crimmins, Christine Eibner, Étienne Gaudette, Geoff Joyce, Darius Lakdawalla, Pierre-Carl Michaud, and Julie Zissimopoulos have all provided expert guidance. Adam Gailey, Baoping Shang, and Igor Vaynman provided programming and analytic support during the first years of development at RAND. In more recent years, the University of Southern California research programming team has supported model development. These programmers include Patricia St. Clair, Laura Gascue, Henu Zhao, and Yuhui Zheng. Barbara Blaylock and Wendy Cheng have greatly aided model development while working as research assistants at USC.

## 13 Tables



| Source (years, ages)    | Prevalence % |                |        |          |              |              |            |       |
|-------------------------|--------------|----------------|--------|----------|--------------|--------------|------------|-------|
|                         | Cancer       | Heart Diseases | Stroke | Diabetes | Hypertension | Lung Disease | Overweight | Obese |
| HRS (1991-2008, 55-64)  | 8%           | 14%            | 4%     | 15%      | 44%          | 7%           | 39%        | 33%   |
| NHIS (1997-2010, 55-64) | 8%           | 17%            | 4%     | 14%      | 44%          | 8%           | 37%        | 33%   |
| MEPS (2000-2010, 55-64) | 7%           | 17%            | 4%     | 15%      | 47%          | 7%           | 38%        | 32%   |
| HRS (1991-2008, 65+)    | 18%          | 30%            | 11%    | 20%      | 58%          | 10%          | 38%        | 23%   |
| NHIS (1997-2010, 65+)   | 16%          | 31%            | 9%     | 17%      | 56%          | 10%          | 36%        | 25%   |
| MCBS (2000-2010, 65+)   | 18%          | 40%            | 11%    | 23%      | 65%          | 16%          | 38%        | 23%   |
| MEPS (2000-2010, 65+)   | 12%          | 33%            | 11%    | 19%      | 64%          | 10%          | 38%        | 25%   |

Table 1: Health condition prevalences in survey data

|                |                                                                                                                                            | Survey                                                                                                                                                                                                                                        |                                                                                                                                                                     |                                                                                                                                                                                          |  |
|----------------|--------------------------------------------------------------------------------------------------------------------------------------------|-----------------------------------------------------------------------------------------------------------------------------------------------------------------------------------------------------------------------------------------------|---------------------------------------------------------------------------------------------------------------------------------------------------------------------|------------------------------------------------------------------------------------------------------------------------------------------------------------------------------------------|--|
| Disease        | HRS                                                                                                                                        | NHIS                                                                                                                                                                                                                                          | MEPS                                                                                                                                                                | MCBS                                                                                                                                                                                     |  |
| Cancer         | Has a doctor ever told you that you have cancer or a malignant tumor, excluding minor skin cancers?                                        | Have you ever been told by a doctor or other health professional that you had cancer or a malignancy of any kind? (WHEN RECODED, SKIN CANCERS WERE EXCLUDED)                                                                                  | List all the conditions that bothered (the person) from (START time) to (END time) CCS codes for the conditions list are 11-21, 24-45                               | Has a doctor ever told you that you had any (other) kind of cancer malignancy, or tumor other than skin cancer?                                                                          |  |
| Heart Diseases | Has a doctor ever told you that you had a heart attack, coronary heart disease, angina, congestive heart failure, or other heart problems? | Four separate questions were asked about whether ever told by a doctor or other health professional that had: CHD, Angina, MI, other heart problems.                                                                                          | Have you ever been told by a doctor or health professional that you have CHD; Angina; MI; other heart problems                                                      | Six separate questions were asked about whether ever told by a doctor that had: Angina or MI; CHD; other heart problems (included four questions)                                        |  |
| Stroke         | Has a doctor ever told you that you had a stroke?                                                                                          | Have you EVER been told by a doctor or other health professional that you had a stroke?                                                                                                                                                       | If Female, add: [Other than during pregnancy.] Have you ever been told by a doctor or health professional that you have a stroke or TIA (transient ischemic attack) | [Since (PREV< SUPP. RD. INT. DATE).] has a doctor (ever) told (you/SP) that (you/he/she) had a stroke, a brain hemorrhage, or a cerebrovascular accident?                                |  |
| Diabetes       | Has a doctor ever told you that you have diabetes or high blood sugar?                                                                     | If Female, add: [Other than during pregnancy.] Have you ever been told by a doctor or health professional that you have diabetes or sugar diabetes?                                                                                           | If Female, add: [Other than during pregnancy.] Have you ever been told by a doctor or health professional that you have diabetes or sugar diabetes?                 | Has a doctor (ever) told (you/SP) that (you/he/she) had diabetes, high blood sugar, or sugar in (your/his/her) urine? [DO NOT INCLUDE BOORDER-LINE PREGNANCY, OR PRE-DIABETIC DIABETES.] |  |
| Hypertension   | Has a doctor ver told you that you have high blood pressure or hypertension?                                                               | Have you EVER been told by a doctor or other health professional that you had Hypertension, also called high blood pressure?                                                                                                                  | Have you EVER been told by a doctor or other health professional that you had Hypertension, also called high blood pressure?                                        | Has a doctor (ever) told (you/SP) that (you/he/she) (still) (had) (have/has) hypertension, sometimes called high blood pressure?                                                         |  |
| Lung Disease   | Has a doctor ever told you that you have chronic lung disease such a schronic bronchitis or emphysema? [IWER: DO NOT INCLUDE ASTHMA]       | Question 1: During the PAST 12 MONTHS, have you ever been told by a doctor or other health professional that you had chronic bronchitis? Question 2: Have you EVER been told by a doctor or other health professional that you had emphysema? | List all the conditions that bothered (the person) from (START time) to (END time) CCS codes for the conditions list are 127, 129-312                               | Has a doctor (ever) told (you/SP) that (you/he/she) had emphysema, asthma, or COPD? [COPD=CHRONIC OBSTRUCTIVE PULMONARY DISEASE.]                                                        |  |
| Overweight     |                                                                                                                                            |                                                                                                                                                                                                                                               |                                                                                                                                                                     |                                                                                                                                                                                          |  |
| Obese          |                                                                                                                                            |                                                                                                                                                                                                                                               |                                                                                                                                                                     |                                                                                                                                                                                          |  |

Self-reported body weight and height

Table 2: Survey questions used to determine health conditions

| <b>Conditions</b>                                                         | <b>Data source</b>                                                                                                                                                      | <b>Projection method</b>                                                                                                                                                                                                                                                                                                                                                                    | <b>Other sources</b>                                                                                                                                                                                                   |
|---------------------------------------------------------------------------|-------------------------------------------------------------------------------------------------------------------------------------------------------------------------|---------------------------------------------------------------------------------------------------------------------------------------------------------------------------------------------------------------------------------------------------------------------------------------------------------------------------------------------------------------------------------------------|------------------------------------------------------------------------------------------------------------------------------------------------------------------------------------------------------------------------|
| Diabetes<br>Heart disease<br>Hypertension                                 | National Health<br>Interview Survey<br>1997-2006                                                                                                                        | Use synthetic cohort<br>approach to estimate<br>age-specific incidence<br>rate for each condition                                                                                                                                                                                                                                                                                           | There are other forecasts<br>(Honeycutt et al., 2003;<br>Mainous III et al., 2007)<br>for the trends of diabetes<br>in the U.S population; we<br>compare their forecasts to<br>ours and they are reason-<br>ably close |
| Overweight<br>and obese                                                   | Prevalence of<br>over-weight and<br>obese for aged<br>46-56 from year<br>2001 to 2030,<br>generated by<br>Ruhm upon<br>request                                          | Assume annual rate<br>of change during year<br>2031-2050 linearly de-<br>creases from the 2030<br>rate to zero in 2050                                                                                                                                                                                                                                                                      | Ruhm (2007)                                                                                                                                                                                                            |
| Ever-smoked<br>and smoking<br>now                                         | Forecast of<br>prevalence of<br>ever-smoked and<br>smoking now<br>for aged 45-54<br>from year 2005<br>to 2025, by Levy<br>(2006)                                        | For ever-smoked, as-<br>sume that the preva-<br>lence at age 45-54 in<br>year 2035 (2045) is<br>the same as prevalence<br>at age 35-44 (25-34)<br>in year 2025. As-<br>sume that the annual<br>change in prevalence<br>at age 45-54 in year<br>2046-2050 the same as<br>average in 2040-2045.<br>For smoking-now, af-<br>ter year 2025, use the<br>moving average of the<br>past five years |                                                                                                                                                                                                                        |
| Any DB from<br>current job                                                |                                                                                                                                                                         | Assume annual rela-<br>tive declining rate for<br>DB entitlement de-<br>crease by 2% a year                                                                                                                                                                                                                                                                                                 | Historical trends of DB<br>participation rates among<br>all persons by different<br>birth cohorts and by age,<br>by Poterba et al. (2007)                                                                              |
| Any DC from<br>current job                                                |                                                                                                                                                                         | Assume annual rel-<br>ative increasing rate<br>for DC entitlement in-<br>crease by 2% a year<br>until 2026 then stays<br>the same after 2026                                                                                                                                                                                                                                                | Forecast of DC partici-<br>pation rates among all<br>persons by different birth<br>cohorts and by age, by<br>Poterba et al. (2008)                                                                                     |
| Population<br>size 50-52<br>Male<br>Hispanic<br>Non-<br>Hispanic<br>black | Census Bureau<br>2000-2010 Inter-<br>censal Popula-<br>tion Estimates,<br>2012 National<br>Population Es-<br>timates, and<br>2012 National<br>Population<br>Projections | Projected 2060 - 2080<br>using linear trend<br>based on 2040-2060                                                                                                                                                                                                                                                                                                                           |                                                                                                                                                                                                                        |

Table 3: Data sources and methods for projecting future cohort trends

Ratio of future prevalence to 2004 prevalence for 51-52 year olds

| Year | Binary outcomes |               |          | Ordered outcomes (highest category) |                                 | Censored discrete outcomes |             |             |
|------|-----------------|---------------|----------|-------------------------------------|---------------------------------|----------------------------|-------------|-------------|
|      | Hypertension    | Heart Disease | Diabetes | BMI Status<br>(BMI $\geq$ 40)       | Smoking Status<br>(smoking now) | Any DB Plan                | Any DC Plan | Any DC Plan |
| 2010 | 1.00            | 1.00          | 1.00     | 1.00                                | 1.00                            | 1.00                       | 1.00        | 1.00        |
| 2020 | 1.06            | 0.95          | 1.11     | 1.40                                | 0.83                            | 0.82                       | 1.26        | 1.26        |
| 2030 | 1.08            | 0.92          | 1.14     | 1.81                                | 0.67                            | 0.67                       | 1.41        | 1.41        |
| 2040 | 1.10            | 0.90          | 1.16     | 2.18                                | 0.54                            | 0.55                       | 1.41        | 1.41        |
| 2050 | 1.11            | 0.88          | 1.18     | 2.31                                | 0.43                            | 0.45                       | 1.41        | 1.41        |

Table 4: Projected baseline trends for future cohorts

| Condition                                      | Prevalence |       |                                                      |
|------------------------------------------------|------------|-------|------------------------------------------------------|
|                                                | 1978       | 2004  | Annual rate of change to get 1978 prevalence by 2030 |
| $30 \leq \text{BMI} < 35$ (kg/m <sup>2</sup> ) | 0.112      | 0.224 | -0.026                                               |
| $35 \leq \text{BMI} < 40$ (kg/m <sup>2</sup> ) | 0.028      | 0.058 | -0.028                                               |
| $\text{BMI} \geq 40$ (kg/m <sup>2</sup> )      | 0.014      | 0.040 | -0.040                                               |
| Hypertension                                   | 0.326      | 0.335 | -0.001                                               |
| Diabetes                                       | 0.047      | 0.094 | -0.026                                               |
| Currently smoking                              | 0.398      | 0.281 | 0.013                                                |

Table 5: Prevalence of obesity, hypertension, diabetes and current smokers among ages 46-56 in 1978 and 2004. Prevalence in 1978 is based on NHANES II 1976-1980; Prevalence in 2004 is based on NHANES 2003-2004. BMI is calculated using self-reported weight and height.

|                |                        | Type               | At risk                  | Mean/fraction |
|----------------|------------------------|--------------------|--------------------------|---------------|
| Disease        | heart disease          | biennial incidence | undiagnosed              | 0.03          |
|                | hypertension           | biennial incidence | undiagnosed              | 0.04          |
|                | stroke                 | biennial incidence | undiagnosed              | 0.01          |
|                | lung disease           | biennial incidence | undiagnosed              | 0.01          |
|                | cancer                 | biennial incidence | undiagnosed              | 0.02          |
|                | diabetes               | biennial incidence | undiagnosed              | 0.02          |
|                | never smoked           | ordered            | all                      | 0.43          |
|                | ex smoker              | ordered            | all                      | 0.43          |
| Smoking Status | current smoker         | ordered            | all                      | 0.14          |
|                | Log BMI                | continuous         | all                      | 3.30          |
| Risk Factors   | no ADLs                | ordered            | all                      | 0.76          |
|                | 1 ADL                  | ordered            | all                      | 0.08          |
|                | 2 ADLS                 | ordered            | all                      | 0.04          |
|                | 3+ ADLS                | ordered            | all                      | 0.06          |
|                | no IADLs               | ordered            | all                      | 0.84          |
|                | 1 IADL                 | ordered            | all                      | 0.06          |
|                | 2+ IADLs               | ordered            | all                      | 0.04          |
|                | IADL Status            | ordered            | all                      | 0.04          |
| LFP & Benefits | working                | prevalence         | age < 80                 | 0.48          |
|                | DB pension receipt     | biennial incidence | eligible & not receiving | 0.02          |
|                | SS benefit receipt     | biennial incidence | eligible & not receiving | 0.08          |
|                | DI benefit receipt     | prevalence         | eligible & age < 65      | 0.04          |
|                | Any health insurance   | prevalence         | age < 65                 | 0.87          |
|                | SSI receipt            | prevalence         | all                      | 0.03          |
|                | Nursing Home residency | prevalence         | all                      | 0.02          |
|                | Death                  | biennial incidence | all                      | 0.07          |
|                | financial wealth       | median             | all non-zero wealth      | 182,206.06    |
|                | earnings               | median             | all working              | 4,850.00      |
|                | wealth positive        | prevalence         | all                      | 0.96          |

Table 6: Outcomes in the transition model. Estimation sample is HRS 1991-2008 waves.

|                   | Outcome at time $T$ |              |        |              |          |        |            |           |                |     |        |          |          |          |           |              |      |          |                |        |   |
|-------------------|---------------------|--------------|--------|--------------|----------|--------|------------|-----------|----------------|-----|--------|----------|----------|----------|-----------|--------------|------|----------|----------------|--------|---|
|                   | Heart disease       | hypertension | stroke | Lung disease | diabetes | cancer | disability | mortality | Smoking status | BMI | Any HI | DI Claim | SS Claim | DB Claim | SSI Claim | Nursing Home | Work | Earnings | Nonzero Wealth | Wealth |   |
| Heart disease     | ✓                   |              | ✓      |              |          |        | ✓          | ✓         | ✓              | ✓   | ✓      | ✓        | ✓        | ✓        | ✓         | ✓            | ✓    | ✓        | ✓              | ✓      | ✓ |
| Blood pressure    |                     |              | ✓      |              |          |        | ✓          | ✓         | ✓              | ✓   | ✓      | ✓        | ✓        | ✓        | ✓         | ✓            | ✓    | ✓        | ✓              | ✓      | ✓ |
| Stroke            |                     |              | ✓      |              |          |        | ✓          | ✓         | ✓              | ✓   | ✓      | ✓        | ✓        | ✓        | ✓         | ✓            | ✓    | ✓        | ✓              | ✓      | ✓ |
| Lung disease      |                     |              |        | ✓            |          |        | ✓          | ✓         | ✓              | ✓   | ✓      | ✓        | ✓        | ✓        | ✓         | ✓            | ✓    | ✓        | ✓              | ✓      | ✓ |
| Diabetes          |                     | ✓            |        |              | ✓        |        | ✓          | ✓         | ✓              | ✓   | ✓      | ✓        | ✓        | ✓        | ✓         | ✓            | ✓    | ✓        | ✓              | ✓      | ✓ |
| Cancer            |                     |              |        |              | ✓        |        | ✓          | ✓         | ✓              | ✓   | ✓      | ✓        | ✓        | ✓        | ✓         | ✓            | ✓    | ✓        | ✓              | ✓      | ✓ |
| Disability        |                     |              |        |              |          |        | ✓          | ✓         | ✓              | ✓   | ✓      | ✓        | ✓        | ✓        | ✓         | ✓            | ✓    | ✓        | ✓              | ✓      | ✓ |
| Claimed DI        |                     |              |        |              |          |        | ✓          | ✓         | ✓              | ✓   | ✓      | ✓        | ✓        | ✓        | ✓         | ✓            | ✓    | ✓        | ✓              | ✓      | ✓ |
| Claimed SS        |                     |              |        |              |          |        | ✓          | ✓         | ✓              | ✓   | ✓      | ✓        | ✓        | ✓        | ✓         | ✓            | ✓    | ✓        | ✓              | ✓      | ✓ |
| Claimed DB        |                     |              |        |              |          |        | ✓          | ✓         | ✓              | ✓   | ✓      | ✓        | ✓        | ✓        | ✓         | ✓            | ✓    | ✓        | ✓              | ✓      | ✓ |
| Claimed SSI       |                     |              |        |              |          |        | ✓          | ✓         | ✓              | ✓   | ✓      | ✓        | ✓        | ✓        | ✓         | ✓            | ✓    | ✓        | ✓              | ✓      | ✓ |
| Work              |                     |              |        |              |          |        |            |           |                |     |        |          | ✓        | ✓        | ✓         | ✓            | ✓    | ✓        | ✓              | ✓      | ✓ |
| Earnings          |                     |              |        |              |          |        |            |           |                |     |        | ✓        | ✓        | ✓        | ✓         | ✓            | ✓    | ✓        | ✓              | ✓      | ✓ |
| Nonzero wealth    |                     |              |        |              |          |        |            |           |                |     | ✓      | ✓        | ✓        | ✓        | ✓         | ✓            | ✓    | ✓        | ✓              | ✓      | ✓ |
| Wealth            |                     |              |        |              |          |        |            |           |                |     | ✓      | ✓        | ✓        | ✓        | ✓         | ✓            | ✓    | ✓        | ✓              | ✓      | ✓ |
| Nursing home stay |                     |              |        |              |          |        |            |           |                |     |        |          |          |          |           | ✓            | ✓    | ✓        | ✓              | ✓      | ✓ |

Table 7: Restrictions on transition model. ✓ indicates that an outcome at time  $T - 1$  is allowed in the transition model for an outcome at time  $T$ .

| Control variable                                       | Unweighted Statistics |                    |         |         |
|--------------------------------------------------------|-----------------------|--------------------|---------|---------|
|                                                        | Mean                  | Standard deviation | Minimum | Maximum |
| Non-Hispanic black                                     | 0.135                 | 0.341              | 0       | 1       |
| Hispanic                                               | 0.0877                | 0.283              | 0       | 1       |
| Less than high school                                  | 0.252                 | 0.434              | 0       | 1       |
| Some college and above                                 | 0.396                 | 0.489              | 0       | 1       |
| Male                                                   | 0.434                 | 0.496              | 0       | 1       |
| Ever smoked                                            | 0.587                 | 0.492              | 0       | 1       |
| Fitted values                                          | 1844                  | 1085               | 0       | 4250    |
| frq                                                    |                       |                    |         |         |
| Init.of Any DB from current job RNDHRS_N               | 0.269                 | 0.443              | 0       | 1       |
| fnra3                                                  | 0.0412                | 0.199              | 0       | 1       |
| fnra4                                                  | 0.0295                | 0.169              | 0       | 1       |
| fnra5                                                  | 0.0579                | 0.234              | 0       | 1       |
| Any DC from current job RND VG                         | 0.118                 | 0.323              | 0       | 1       |
| (IHT of DC wltH in 1000s)/100 if any DC zero otherwise | 0.00428               | 0.0130             | 0       | 0.0801  |

Table 8: Descriptive statistics for exogeneous control variables in 2004 HRS ages 51+ sample used as simulation stock population



| Outcome               | 2000        |             |          | 2006        |             |          | 2012        |             |          |
|-----------------------|-------------|-------------|----------|-------------|-------------|----------|-------------|-------------|----------|
|                       | FEM<br>mean | HRS<br>mean | <i>p</i> | FEM<br>mean | HRS<br>mean | <i>p</i> | FEM<br>mean | HRS<br>mean | <i>p</i> |
| Died                  | 0.053       | 0.057       | 0.101    | 0.068       | 0.079       | 0.001    | 0.084       | 0.084       | 0.886    |
| Lives in nursing home | 0.023       | 0.022       | 0.339    | 0.034       | 0.030       | 0.145    | 0.045       | 0.038       | 0.030    |

Table 9: Data-splitting validation of 1998 cohort: Simulated vs reported mortality and nursing home outcomes in 2000, 2006, and 2012

| Outcome         | 2000        |             |          | 2006        |             |          | 2012        |             |          |
|-----------------|-------------|-------------|----------|-------------|-------------|----------|-------------|-------------|----------|
|                 | FEM<br>mean | HRS<br>mean | <i>p</i> | FEM<br>mean | HRS<br>mean | <i>p</i> | FEM<br>mean | HRS<br>mean | <i>p</i> |
| Age on July 1st | 66.722      | 66.568      | 0.207    | 70.694      | 70.590      | 0.403    | 74.655      | 74.720      | 0.606    |
| Black           | 0.087       | 0.089       | 0.586    | 0.086       | 0.083       | 0.410    | 0.084       | 0.082       | 0.800    |
| Hispanic        | 0.060       | 0.060       | 0.952    | 0.062       | 0.061       | 0.882    | 0.066       | 0.064       | 0.598    |
| Male            | 0.454       | 0.447       | 0.308    | 0.449       | 0.439       | 0.169    | 0.443       | 0.429       | 0.095    |

Table 10: Data-splitting validation of 1998 cohort: Simulated vs reported demographic outcomes in 2000, 2006, and 2012

| Outcome       | 2000        |             |          | 2006        |             |          | 2012        |             |          |
|---------------|-------------|-------------|----------|-------------|-------------|----------|-------------|-------------|----------|
|               | FEM<br>mean | HRS<br>mean | <i>p</i> | FEM<br>mean | HRS<br>mean | <i>p</i> | FEM<br>mean | HRS<br>mean | <i>p</i> |
| Any ADLs      | 0.154       | 0.155       | 0.817    | 0.170       | 0.176       | 0.272    | 0.203       | 0.181       | 0.000    |
| Any IADLs     | 0.076       | 0.075       | 0.588    | 0.087       | 0.091       | 0.336    | 0.111       | 0.111       | 0.915    |
| Cancer        | 0.119       | 0.116       | 0.482    | 0.168       | 0.163       | 0.267    | 0.215       | 0.216       | 0.910    |
| Diabetes      | 0.143       | 0.139       | 0.349    | 0.199       | 0.193       | 0.259    | 0.254       | 0.240       | 0.042    |
| Heart Disease | 0.199       | 0.202       | 0.587    | 0.254       | 0.258       | 0.607    | 0.322       | 0.318       | 0.580    |
| Hypertension  | 0.456       | 0.440       | 0.011    | 0.568       | 0.567       | 0.904    | 0.660       | 0.658       | 0.840    |
| Lung Disease  | 0.075       | 0.071       | 0.176    | 0.103       | 0.091       | 0.003    | 0.123       | 0.112       | 0.026    |
| Stroke        | 0.064       | 0.069       | 0.061    | 0.088       | 0.095       | 0.119    | 0.114       | 0.116       | 0.755    |

Table 11: Data-splitting validation of 1998 cohort: Simulated vs reported binary health outcomes in 2000, 2006, and 2012

| Outcome        | 2000        |             |          | 2006        |             |          | 2012        |             |          |
|----------------|-------------|-------------|----------|-------------|-------------|----------|-------------|-------------|----------|
|                | FEM<br>mean | HRS<br>mean | <i>p</i> | FEM<br>mean | HRS<br>mean | <i>p</i> | FEM<br>mean | HRS<br>mean | <i>p</i> |
| BMI            | 27.128      | 27.108      | 0.756    | 27.418      | 27.674      | 0.001    | 27.509      | 27.646      | 0.135    |
| Current smoker | 0.151       | 0.152       | 0.822    | 0.115       | 0.117       | 0.658    | 0.096       | 0.091       | 0.239    |
| Ever smoked    | 0.591       | 0.593       | 0.788    | 0.580       | 0.582       | 0.698    | 0.563       | 0.565       | 0.779    |

Table 12: Data-splitting validation of 1998 cohort: Simulated vs reported risk factor outcomes in 2000, 2006, and 2012

| MEPS 2001 (ages 51+) |     |      |     | HRS 1998 (ages 51+) |                    |     |      |      |       |
|----------------------|-----|------|-----|---------------------|--------------------|-----|------|------|-------|
| ADL limitation       |     |      |     | ADL limitation      |                    |     |      |      |       |
|                      |     | No   | Yes | All                 |                    |     | No   | Yes  | All   |
| IADL<br>limitation   | No  | 91.5 | 0.4 | 92.0                | IADL<br>limitation | No  | 82.0 | 10.5 | 92.5  |
|                      | Yes | 4.4  | 3.7 | 8.0                 |                    | Yes | 3.1  | 4.5  | 7.5   |
|                      | All | 95.9 | 4.1 | 100.0               |                    | All | 85.1 | 14.9 | 100.0 |

Table 13: Prevalence of IADL and ADL limitations among ages 51+ in MEPS 2001 and HRS 1998. The IADL limitations in MEPS are defined as receiving help or supervision using the telephone, paying bills, taking medications, preparing light meals, doing laundry, or going shopping; the ADL limitations in HRS are defined as receiving help or supervision with personal care such as bathing, dressing, or getting around the house. The IADL limitations in HRS are defined as having any difficulty in at least one of the following activities: using the phone, taking medications, and managing money. The ADL limitations in HRS are defined as having any difficulty in at least one of the following activities: bathing, dressing, eating, walking across the room, and getting out of bed.

| MEPS 2001 (ages 51+)            |     |      |      | HRS 1998 (ages 51+)             |                    |     |      |      |       |
|---------------------------------|-----|------|------|---------------------------------|--------------------|-----|------|------|-------|
| Physical function<br>limitation |     |      |      | Physical function<br>limitation |                    |     |      |      |       |
|                                 |     | No   | Yes  | All                             |                    |     | No   | Yes  | All   |
| IADL<br>limitation              | No  | 61.6 | 30.4 | 92.0                            | IADL<br>limitation | No  | 60.0 | 32.5 | 92.5  |
|                                 | Yes | 0.3  | 7.8  | 8.0                             |                    | Yes | 1.0  | 6.5  | 7.5   |
|                                 | All | 61.9 | 38.2 | 100.0                           |                    | All | 61.0 | 39.0 | 100.0 |

Table 14: Prevalence of IADL limitation and physical function limitation among ages 51+ in MEPS 2001 and HRS 1998. The definition of IADL limitation is the same as in Table 13. Physical function limitation in MEPS indicates that at least one of the following is true: 1) receiving help or supervision with bathing, dressing or walking around the house; 2) being limited in work/housework; 3) having difficulty walking, climbing stairs, grasping objects, reaching overhead, lifting, bending or stooping, or standing for long periods of time; or 4) having difficulty in hearing or vision. Physical function limitation in HRS indicates at least one of the following is true: 1) having any difficulty in bathing/dressing/eating/walking across the room/getting out of bed; 2) limited in work/housework; or 3) limited in any other activities.

|                                                | Model I              | Model II             | Model III            | Model IV             | Model V              |
|------------------------------------------------|----------------------|----------------------|----------------------|----------------------|----------------------|
| Constant                                       | 0.877***<br>(0.002)  | 0.898***<br>(0.003)  | 0.874***<br>(0.005)  | 0.839***<br>(0.002)  | 0.869***<br>(0.003)  |
| Physical function limitation                   | -0.115***<br>(0.004) | -0.098***<br>(0.005) | -0.094***<br>(0.004) |                      |                      |
| IADL limitation                                | -0.041<br>(0.037)    | -0.019<br>(0.042)    | -0.008<br>(0.036)    |                      |                      |
| IADL limitation * Physical function limitation | -0.150***<br>(0.037) | -0.156***<br>(0.044) | -0.162***<br>(0.037) |                      |                      |
| IADL limitation, no ADL limitation             |                      |                      |                      | -0.182***<br>(0.009) |                      |
| Any ADL limitation                             |                      |                      |                      | -0.344***<br>(0.010) |                      |
| Ever diagnosed with cancer                     |                      | -0.011<br>(0.009)    | -0.015**<br>(0.007)  |                      | -0.030***<br>(0.010) |
| Ever diagnosed with diabetes                   |                      | -0.034***<br>(0.007) | -0.032***<br>(0.005) |                      | -0.054***<br>(0.007) |
| Ever diagnosed with high blood pressure        |                      | -0.030***<br>(0.004) | -0.028***<br>(0.004) |                      | -0.043***<br>(0.005) |
| Ever diagnosed with heart disease              |                      | -0.024***<br>(0.006) | -0.029***<br>(0.005) |                      | -0.055***<br>(0.006) |
| Ever diagnosed with lung disease               |                      | -0.036***<br>(0.009) | -0.032***<br>(0.007) |                      | -0.055***<br>(0.010) |
| Ever diagnosed with stroke                     |                      | -0.045***<br>(0.012) | -0.046***<br>(0.008) |                      | -0.115***<br>(0.013) |
| Age 65-74                                      |                      |                      | 0.010**<br>(0.004)   |                      |                      |
| Age 75 and over                                |                      |                      | 0.015***<br>(0.005)  |                      |                      |
| Male                                           |                      |                      | 0.028***<br>(0.004)  |                      |                      |
| Non-Hispanic black                             |                      |                      | 0.008<br>(0.007)     |                      |                      |
| Hispanic                                       |                      |                      | -0.001<br>(0.007)    |                      |                      |
| Less than HS                                   |                      |                      | -0.022***<br>(0.005) |                      |                      |
| Some college                                   |                      |                      | 0.016***<br>(0.005)  |                      |                      |
| College grad                                   |                      |                      | 0.037***<br>(0.005)  |                      |                      |
| Census region: Northeast                       |                      |                      | 0.003<br>(0.005)     |                      |                      |
| Census region: Midwest                         |                      |                      | 0.004<br>(0.005)     |                      |                      |
| Census region: West                            |                      |                      | -0.012**<br>(0.005)  |                      |                      |
| Marital status: widowed                        |                      |                      | 0.003<br>(0.005)     |                      |                      |
| Marital status: single                         |                      |                      | -0.013***<br>(0.005) |                      |                      |
| <i>N</i>                                       | 7,358                | 7,317                | 7,317                | 7,361                | 7,322                |
| Adjusted <i>R</i> <sup>2</sup>                 | .24                  | .27                  | .29                  | .18                  | .11                  |

\*  $p < 0.10$ , \*\*  $p < 0.05$ , \*\*\*  $p < 0.01$

Table 15: OLS regressions of EQ-5D utility index among ages 51+ in MEPS 2001.  $p$ -values in parentheses. Data source: MEPS 2001 (ages 51+). EQ-5D scoring algorithm is based on Shaw et al. (2005).

|                                         |         |
|-----------------------------------------|---------|
| Ever diagnosed with cancer              | -0.020* |
|                                         | (0.001) |
| Ever diagnosed with diabetes            | -0.042* |
|                                         | (0.001) |
| Ever diagnosed with heart disease       | -0.044* |
|                                         | (0.001) |
| Ever diagnosed with high blood pressure | -0.034* |
|                                         | (0.001) |
| Ever diagnosed with lung disease        | -0.054* |
|                                         | (0.001) |
| Ever diagnosed with stroke              | -0.067* |
|                                         | (0.002) |
| IADL limitation only                    | -0.160* |
|                                         | (0.002) |
| One or two ADL limitations              | -0.099* |
|                                         | (0.001) |
| Three or more ADL limitations           | -0.149* |
|                                         | (0.002) |
| Constant                                | 0.881*  |
|                                         | (0.001) |
| <i>N</i>                                | 19,676  |
| Adjusted <i>R</i> <sup>2</sup>          | 0.67    |

\*  $p < 0.01$

Table 16: OLS regression of the predicted EQ-5D index score against chronic conditions and FEM-type functional status specification.  $p$ -values in parentheses. Data source: Health and Retirement Study, 1998. Sample included the age 51 and over community respondents. EQ-5D score was predicted using Model II in Table 15.

Prevalence of chronic conditions

| Functional status                               | Predicted |             |      | Prevalence of chronic conditions |          |               |              |              |        |
|-------------------------------------------------|-----------|-------------|------|----------------------------------|----------|---------------|--------------|--------------|--------|
|                                                 | Estimate  | EQ-5D score | Age  | Cancer                           | Diabetes | Heart disease | Hypertension | Lung disease | Stroke |
| Healthy                                         | Mean      | 0.841       | 63.9 | 0.114                            | 0.142    | 0.189         | 0.481        | 0.072        | 0.045  |
|                                                 | Sd        | 0.042       | 10.0 | 0.318                            | 0.349    | 0.391         | 0.500        | 0.258        | 0.207  |
|                                                 | Std. err  | 0.000       | 0.0  | 0.001                            | 0.001    | 0.001         | 0.001        | 0.001        | 0.001  |
| IADL limitation only - not in nursing home      | Mean      | 0.655       | 70.0 | 0.151                            | 0.223    | 0.334         | 0.581        | 0.152        | 0.162  |
|                                                 | Sd        | 0.054       | 12.9 | 0.358                            | 0.416    | 0.472         | 0.493        | 0.359        | 0.368  |
|                                                 | Std. err  | 0.001       | 0.2  | 0.005                            | 0.005    | 0.006         | 0.006        | 0.005        | 0.005  |
| 1 or 2 ADL limitations - not in nursing home    | Mean      | 0.705       | 69.1 | 0.180                            | 0.291    | 0.393         | 0.665        | 0.194        | 0.162  |
|                                                 | Sd        | 0.057       | 12.0 | 0.384                            | 0.454    | 0.488         | 0.472        | 0.395        | 0.368  |
|                                                 | Std. err  | 0.000       | 0.1  | 0.003                            | 0.003    | 0.004         | 0.003        | 0.003        | 0.003  |
| 3 or more ADL limitations - not in nursing home | Mean      | 0.636       | 70.9 | 0.181                            | 0.361    | 0.467         | 0.691        | 0.216        | 0.314  |
|                                                 | Sd        | 0.063       | 13.2 | 0.385                            | 0.480    | 0.499         | 0.462        | 0.412        | 0.464  |
|                                                 | Std. err  | 0.001       | 0.2  | 0.005                            | 0.006    | 0.006         | 0.006        | 0.005        | 0.006  |
| Nursing home residency                          | Mean      | 0.568       | 82.0 | 0.144                            | 0.256    | 0.428         | 0.651        | 0.142        | 0.372  |
|                                                 | Sd        | 0.077       | 10.0 | 0.351                            | 0.437    | 0.495         | 0.477        | 0.349        | 0.484  |
|                                                 | Std. err  | 0.001       | 0.2  | 0.006                            | 0.008    | 0.009         | 0.008        | 0.006        | 0.009  |
| All                                             | Mean      | 0.808       | 65.2 | 0.125                            | 0.170    | 0.229         | 0.514        | 0.094        | 0.076  |
|                                                 | Sd        | 0.083       | 10.9 | 0.331                            | 0.375    | 0.420         | 0.500        | 0.291        | 0.266  |
|                                                 | Std. err  | 0.000       | 0.0  | 0.001                            | 0.001    | 0.001         | 0.001        | 0.001        | 0.001  |

Table 17: Average predicted EQ-5D score, age, and prevalence of chronic conditions by functional status for the stock FEM simulation sample (ages 51 and over in 2004). EQ-5D scores were predicted according to parameter estimates in Table 16. The predicted score for nursing home residents is reduced by 10% to account for the fact that the estimation sample in Table 16 only includes non-nursing home residents.

|                     |                        | Selection                 | 1992       | 2004       |      |
|---------------------|------------------------|---------------------------|------------|------------|------|
| Binary              | working for pay        | all                       | 0.75       | 0.78       |      |
|                     | non-zero wealth        | all                       | 0.97       | 0.98       |      |
|                     | hypertension           | all                       | 0.29       | 0.39       |      |
|                     | heart disease          | all                       | 0.08       | 0.09       |      |
|                     | diabetes               | all                       | 0.07       | 0.12       |      |
|                     | any health insurance   | all                       | 0.86       | 0.86       |      |
|                     | SRH fair or poor       | all                       | 0.18       |            |      |
| Ordered             | BMI status             | normal                    | all        | 0.37       | 0.21 |
|                     |                        | overweight                | all        | 0.40       | 0.39 |
|                     |                        | $30 \leq \text{BMI} < 35$ | all        | 0.17       | 0.26 |
|                     |                        | $35 \leq \text{BMI} < 40$ | all        | 0.04       | 0.09 |
|                     |                        | $\text{BMI} \geq 40$      | all        | 0.02       | 0.05 |
|                     | Smoking status         | never smoked              | all        | 0.36       | 0.44 |
|                     |                        | former smoker             | all        | 0.35       | 0.32 |
|                     |                        | current smoker            | all        | 0.29       | 0.24 |
|                     | Functional status      | no ADL                    | all        | 0.92       | 0.88 |
| no IADL             |                        | all                       | 0.91       | 0.93       |      |
| Continuous          | AIME (nominal \$USD)   | all                       |            | 2,166.15   |      |
|                     | quarters of coverage   | all                       |            | 100.56     |      |
| Censored continuous | earnings               | if working                | 45,750.76  | 47,422.59  |      |
|                     | wealth                 | if non-zero               | 290,582.06 | 322,743.25 |      |
|                     | DC wealth              | if dc plan                | 19.14      | 25.98      |      |
| Censored discrete   | any DB plan            | if working                | 0.44       | 0.50       |      |
|                     | any DC plan            | if working                | 0.25       | 0.28       |      |
| Censored ordered    | Early age eligible DB  | <52                       |            | 0.38       |      |
|                     |                        | 52-57                     |            | 0.12       |      |
|                     |                        | 58>                       |            | 0.37       |      |
|                     | Normal age eligible DB | <57                       |            | 0.38       |      |
|                     |                        | 57-61                     |            | 0.10       |      |
|                     |                        | 62-63                     |            | 0.17       |      |
|                     |                        | 64>                       |            | 0.10       |      |
| Covariates          | hispanic               | all                       | 0.07       | 0.11       |      |
|                     | black                  | all                       | 0.10       | 0.12       |      |
|                     | male                   | all                       | 0.48       | 0.49       |      |
|                     | less high school       | all                       | 0.21       | 0.10       |      |
|                     | college                | all                       | 0.41       | 0.60       |      |
|                     | single                 | all                       | 0.19       | 0.27       |      |
|                     | widowed                | all                       | 0.04       | 0.02       |      |
|                     | cancer                 | all                       | 0.04       | 0.06       |      |
|                     | lung disease           | all                       | 0.04       | 0.05       |      |

Table 18: Initial conditions used for estimation (1992) and simulation (2004)

| Covariate              | Hypertension |       | Heart disease |       | Diabetes |       | Any health insurance |       | Self-reported health |       | Weight status |       | Smoking status |        | Functional status (ADL) |       | Functional status (IADL) |       | Working |       | Nonzero wealth |       | AIME  |       | Quarters worked |       | IHT(HH wealth) |       | IHT(eamed income) |       | Log(DC wealth) |       | Any DC plan |       | Any DB plan |       | Early retirement age |       | Normal retirement age |       |       |       |       |       |      |
|------------------------|--------------|-------|---------------|-------|----------|-------|----------------------|-------|----------------------|-------|---------------|-------|----------------|--------|-------------------------|-------|--------------------------|-------|---------|-------|----------------|-------|-------|-------|-----------------|-------|----------------|-------|-------------------|-------|----------------|-------|-------------|-------|-------------|-------|----------------------|-------|-----------------------|-------|-------|-------|-------|-------|------|
|                        |              |       |               |       |          |       |                      |       |                      |       |               |       |                |        |                         |       |                          |       |         |       |                |       |       |       |                 |       |                |       |                   |       |                |       |             |       |             |       |                      |       |                       |       |       |       |       |       |      |
| Non-Hispanic black     | 0.52         | 0.03  | 0.45          | 0.27  | 0.49     | 0.39  | 0.22                 | -0.12 | 0.27                 | 0.26  | -0.06         | -0.14 | -0.88          | -20.02 | -0.05                   | -0.04 | -0.01                    | 0.14  | -0.06   | -0.05 | -0.05          | -0.06 | -0.05 | -0.05 | -0.05           | -0.05 | -0.05          | -0.05 | -0.05             | -0.05 | -0.05          | -0.05 | -0.05       | -0.05 | -0.05       | -0.05 | -0.05                | -0.05 | -0.05                 | -0.05 | -0.05 | -0.05 |       |       |      |
| Hispanic               | -0.03        | -0.14 | 0.27          | 0.27  | 0.49     | 0.22  | -0.37                | 0.31  | 0.27                 | 0.27  | -0.14         | -0.14 | -0.86          | -17.66 | -3.29                   | -0.04 | -0.27                    | -0.23 | 0.07    | 0.04  | 0.04           | 0.04  | 0.04  | 0.04  | 0.04            | 0.04  | 0.04           | 0.04  | 0.04              | 0.04  | 0.04           | 0.04  | 0.04        | 0.04  | 0.04        | 0.04  | 0.04                 | 0.04  | 0.04                  | 0.04  | 0.04  | 0.04  |       |       |      |
| Less than high school  | 0.10         | 0.12  | 0.22          | 0.25  | 0.49     | 0.10  | 0.31                 | 0.25  | 0.42                 | 0.42  | -0.35         | -0.35 | -0.42          | -14.79 | -2.98                   | -0.06 | -0.29                    | -0.31 | 0.06    | 0.07  | 0.07           | 0.07  | 0.07  | 0.07  | 0.07            | 0.07  | 0.07           | 0.07  | 0.07              | 0.07  | 0.07           | 0.07  | 0.07        | 0.07  | 0.07        | 0.07  | 0.07                 | 0.07  | 0.07                  | 0.07  | 0.07  | 0.07  | 0.07  | 0.07  |      |
| Some college and above | -0.06        | -0.06 | -0.09         | -0.23 | -0.36    | -0.16 | -0.12                | -0.23 | -0.31                | -0.31 | 0.27          | 0.27  | 0.73           | 14.26  | 5.38                    | 0.10  | 0.24                     | 0.21  | -0.07   | -0.16 | -0.16          | -0.16 | -0.16 | -0.16 | -0.16           | -0.16 | -0.16          | -0.16 | -0.16             | -0.16 | -0.16          | -0.16 | -0.16       | -0.16 | -0.16       | -0.16 | -0.16                | -0.16 | -0.16                 | -0.16 | -0.16 | -0.16 | -0.16 | -0.16 |      |
| Male                   | 0.10         | 0.26  | 0.06          | 0.03  | 0.03     | 0.11  | 0.42                 | -0.03 | -0.14                | -0.14 | 0.56          | 0.56  | 0.00           | -2.53  | 6.90                    | 0.12  | 0.13                     | 0.13  | -0.09   | -0.01 | -0.01          | -0.01 | -0.01 | -0.01 | -0.01           | -0.01 | -0.01          | -0.01 | -0.01             | -0.01 | -0.01          | -0.01 | -0.01       | -0.01 | -0.01       | -0.01 | -0.01                | -0.01 | -0.01                 | -0.01 | -0.01 | -0.01 | -0.01 |       |      |
| Single                 | 0.18         | 0.06  | 0.04          | 0.11  | 0.24     | -0.04 | 0.32                 | 0.11  | 0.05                 | 0.05  | 0.04          | 0.04  | -1.09          | -25.92 | 0.35                    | -0.02 | 0.05                     | -0.04 | -0.00   | 0.07  | 0.07           | 0.07  | 0.07  | 0.07  | 0.07            | 0.07  | 0.07           | 0.07  | 0.07              | 0.07  | 0.07           | 0.07  | 0.07        | 0.07  | 0.07        | 0.07  | 0.07                 | 0.07  | 0.07                  | 0.07  | 0.07  | 0.07  | 0.07  |       |      |
| Widowed                | 0.16         | 0.14  | 0.22          | 0.08  | 0.32     | 0.13  | 0.26                 | 0.08  | -0.03                | -0.03 | 0.07          | 0.07  | -1.08          | -20.13 | -0.05                   | -0.08 | 0.12                     | -0.03 | -0.12   | -0.10 | -0.10          | -0.10 | -0.10 | -0.10 | -0.10           | -0.10 | -0.10          | -0.10 | -0.10             | -0.10 | -0.10          | -0.10 | -0.10       | -0.10 | -0.10       | -0.10 | -0.10                | -0.10 | -0.10                 | -0.10 | -0.10 | -0.10 | -0.10 | -0.10 |      |
| Lung disease           | 0.29         | 0.72  | 0.44          | -0.37 | 1.13     | 0.10  | 0.56                 | 0.84  | 0.28                 | 0.28  | -0.56         | -0.56 | -0.04          | -17.44 | -1.31                   | -0.02 | -0.15                    | 0.06  | 0.04    | 0.00  | 0.00           | 0.00  | 0.00  | 0.00  | 0.00            | 0.00  | 0.00           | 0.00  | 0.00              | 0.00  | 0.00           | 0.00  | 0.00        | 0.00  | 0.00        | 0.00  | 0.00                 | 0.00  | 0.00                  | 0.00  | 0.00  | 0.00  | 0.00  | 0.00  |      |
| Cancer                 | 0.10         | 0.22  | 0.10          | 0.24  | 0.66     | -0.09 | 0.16                 | 0.37  | 0.07                 | 0.07  | -0.12         | -0.12 | 0.26           | -0.20  | 0.30                    | -0.04 | 0.01                     | -0.07 | -0.09   | -0.21 | -0.21          | -0.21 | -0.21 | -0.21 | -0.21           | -0.21 | -0.21          | -0.21 | -0.21             | -0.21 | -0.21          | -0.21 | -0.21       | -0.21 | -0.21       | -0.21 | -0.21                | -0.21 | -0.21                 | -0.21 | -0.21 | -0.21 | -0.21 | -0.21 |      |
| constant               | -0.69        | -1.56 | -1.68         | 1.28  | -1.21    | 0.28  | 0.10                 | -1.51 | -1.35                | -1.35 | 0.44          | 0.44  | 2.73           | 71.97  | 15.12                   | 0.68  | -0.59                    | 0.09  | 0.36    | 0.32  | 0.32           | 0.32  | 0.32  | 0.32  | 0.32            | 0.32  | 0.32           | 0.32  | 0.32              | 0.32  | 0.32           | 0.32  | 0.32        | 0.32  | 0.32        | 0.32  | 0.32                 | 0.32  | 0.32                  | 0.32  | 0.32  | 0.32  | 0.32  | 0.32  | 0.32 |

Table 19: Parameter estimates for latent model: conditional means and thresholds. Sample is respondents age 50-55 in 1992 HRS wave

|                          | Hypertension | Heart disease | Diabetes | Any health insurance | Self-reported health | Weight status | Smoking status | Functional status (ADL) | Functional status (IADL) | Working | Nonzero wealth | AIME     | Quarters worked | IHT(HH wealth) | IHT(earned income) | Log(DC wealth) | Any DC plan | Any DB plan | Early retirement age | Normal retirement age |
|--------------------------|--------------|---------------|----------|----------------------|----------------------|---------------|----------------|-------------------------|--------------------------|---------|----------------|----------|-----------------|----------------|--------------------|----------------|-------------|-------------|----------------------|-----------------------|
| Hypertension             | 1.000        |               |          |                      |                      |               |                |                         |                          |         |                |          |                 |                |                    |                |             |             |                      |                       |
| Heart Disease            | 0.312        | 1.000         |          |                      |                      |               |                |                         |                          |         |                |          |                 |                |                    |                |             |             |                      |                       |
| Diabetes                 | 0.309        | 0.222         | 1.000    |                      |                      |               |                |                         |                          |         |                |          |                 |                |                    |                |             |             |                      |                       |
| Any health insurance     | 0.007        | -0.000        | -0.005   | 1.000                |                      |               |                |                         |                          |         |                |          |                 |                |                    |                |             |             |                      |                       |
| Self-reported health     | 0.333        | 0.500         | 0.439    | -0.078               | 1.000                |               |                |                         |                          |         |                |          |                 |                |                    |                |             |             |                      |                       |
| Weight status            | 0.282        | 0.137         | 0.241    | 0.009                | 0.148                | 1.000         |                |                         |                          |         |                |          |                 |                |                    |                |             |             |                      |                       |
| Smoking status           | -0.014       | 0.004         | 0.011    | -0.104               | 0.071                | -0.091        | 1.000          |                         |                          |         |                |          |                 |                |                    |                |             |             |                      |                       |
| Functional status (ADL)  | 0.205        | 0.317         | 0.279    | -0.052               | 0.501                | 0.144         | 0.028          | 1.000                   |                          |         |                |          |                 |                |                    |                |             |             |                      |                       |
| Functional status (IADL) | 0.075        | 0.105         | 0.073    | -0.035               | 0.170                | 0.039         | -0.022         | 0.195                   | 1.000                    |         |                |          |                 |                |                    |                |             |             |                      |                       |
| Working                  | -0.160       | -0.288        | -0.237   | 0.144                | -0.412               | -0.016        | -0.048         | -0.387                  | -0.177                   | 1.000   |                |          |                 |                |                    |                |             |             |                      |                       |
| Nonzero wealth           | -0.155       | -0.172        | -0.082   | 0.249                | -0.259               | -0.023        | -0.087         | -0.173                  | -0.230                   | 0.392   | 1.000          |          |                 |                |                    |                |             |             |                      |                       |
| IHT(HH wealth)           | -2.406       | -2.504        | -5.633   | 6.743                | -6.607               | -2.526        | -4.539         | -6.178                  | -2.624                   | 2.244   | 0.000          | 1290.806 |                 |                |                    |                |             |             |                      |                       |
| IHT(earned income)       | 0.178        | 0.050         | -0.347   | 3.282                | -1.278               | 0.023         | -0.450         | -0.973                  | -0.769                   | 0.000   | 2.216          | 56.260   | 86.749          |                |                    |                |             |             |                      |                       |
| Log(DC wealth)           | 0.011        | 0.001         | 0.001    | 0.028                | -0.013               | -0.014        | -0.017         | 0.013                   | -0.014                   | 0.000   | -0.034         | 2.498    | 0.805           | 0.066          |                    |                |             |             |                      |                       |
| Any DC plan              | 0.035        | 0.044         | 0.058    | 0.511                | -0.067               | 0.008         | -0.091         | -0.056                  | -0.048                   | 0.000   | 0.183          | 2.918    | 3.449           | 0.000          | 1.000              |                |             |             |                      |                       |
| Any DB plan              | 0.065        | 0.045         | 0.030    | 0.691                | -0.045               | 0.018         | -0.085         | -0.036                  | -0.043                   | 0.000   | 0.216          | 1.036    | 4.510           | -0.019         | 0.737              | 1.000          |             |             |                      |                       |
| Early retirement age     | 0.061        | -0.028        | -0.040   | 0.075                | 0.030                | -0.003        | 0.012          | 0.033                   | 0.002                    | 0.000   | -0.016         | 0.453    | -0.293          | 0.006          | -0.208             | 0.000          | 1.000       |             |                      |                       |
| Normal retirement age    | 0.076        | -0.032        | 0.011    | 0.081                | 0.039                | -0.004        | 0.012          | 0.053                   | -0.007                   | 0.000   | -0.037         | 0.415    | 0.032           | 0.009          | -0.200             | 0.000          | 0.834       | 1.000       |                      |                       |

Table 20: Parameter estimates for latent model: parameterized covariance matrix. Sample is respondents age 50-55 in 1992 HRS wave



| Payment sources | Ages 55-64         |                               |                           | Ages 65 and over   |                               |                           |
|-----------------|--------------------|-------------------------------|---------------------------|--------------------|-------------------------------|---------------------------|
|                 | NHEA 2004 (\$) (A) | FEM 2004, unadjusted (\$) (B) | Adjustment factor (A)/(B) | NHEA 2010 (\$) (C) | FEM 2010, unadjusted (\$) (D) | Adjustment factor (C)/(D) |
| Total           | 7787.00            | 7013.00                       | 1.11                      | 18424.00           | 15901.00                      | 1.16                      |
| Medicare        | 706.00             | 598.00                        | 1.18                      | 10016.00           | 8711.00                       | 1.15                      |
| Medicaid        | 1026.00            | 656.00                        | 1.56                      | 2047.00            | 1215.00                       | 1.68                      |

Table 21: Per capita medical spending by payment source, age group, and year

| Year                                                          | 2010     | 2030     | 2050     |
|---------------------------------------------------------------|----------|----------|----------|
| Population 51+ (Million)                                      | 100.19   | 129.94   | 150.20   |
| Population 65+ (Million)                                      | 45.17    | 74.93    | 84.57    |
| <b>Prevalence of selected conditions for ages 51+</b>         |          |          |          |
| Obesity (BMI $\geq$ 30) (%)                                   | 0.34     | 0.43     | 0.49     |
| Overweight (25 $\leq$ BMI $<$ 30) (%)                         | 0.37     | 0.33     | 0.30     |
| Ever-smoked                                                   | 0.56     | 0.49     | 0.40     |
| Smoking now                                                   | 0.15     | 0.10     | 0.06     |
| Diabetes                                                      | 0.20     | 0.32     | 0.37     |
| Heart disease                                                 | 0.20     | 0.28     | 0.29     |
| Hypertension                                                  | 0.54     | 0.65     | 0.68     |
| <b>Labor participation for ages 51+</b>                       |          |          |          |
| Working (%)                                                   | 0.46     | 0.40     | 0.40     |
| Average earnings if working (\$2010)                          | 47881.74 | 53282.88 | 67189.39 |
| <b>Government revenues from ages 51+ (Billion \$2010)</b>     |          |          |          |
| Federal personal income taxes                                 | 393.40   | 606.09   | 977.84   |
| Social security payroll taxes                                 | 118.79   | 174.20   | 267.40   |
| Medicare payroll taxes                                        | 32.16    | 42.18    | 62.97    |
| Total Revenue                                                 | 544.34   | 822.47   | 1308.20  |
| <b>Government expenditures from ages 51+ (Billion \$2010)</b> |          |          |          |
| Old Age and Survivors Insurance benefits (OASI)               | 655.37   | 1144.62  | 1611.29  |
| Disability Insurance benefits (DI)                            | 59.08    | 43.94    | 62.80    |
| Supplementary Security Income (SSI)                           | 21.78    | 27.28    | 39.26    |
| Medicare costs                                                | 609.32   | 1229.96  | 2398.27  |
| Medicaid costs                                                | 164.15   | 297.47   | 737.53   |
| Medicare + Medicaid                                           | 1509.70  | 2743.27  | 4849.15  |
| Total medical costs for ages 51+ (Billion \$2010)             | 1397.00  | 2806.29  | 5581.84  |

Table 22: Simulation results for status quo scenario

|                                                               | “Obese 1980” Estimates |           | Relative Change from Status Quo |       | Absolute Change from Status Quo |         |
|---------------------------------------------------------------|------------------------|-----------|---------------------------------|-------|---------------------------------|---------|
|                                                               | 2030                   | 2050      | 2030                            | 2050  | 2030                            | 2050    |
| Year                                                          |                        |           |                                 |       |                                 |         |
| Population 51+ (Million)                                      | 130.49                 | 153.92    | 0.00                            | 0.02  | 0.56                            | 3.72    |
| Population 65+ (Million)                                      | 75.29                  | 88.08     | 0.00                            | 0.04  | 0.36                            | 3.51    |
| <b>Prevalence of selected conditions for ages 51+</b>         |                        |           |                                 |       |                                 |         |
| Obesity (BMI $\geq 30$ ) (%)                                  | 0.31                   | 0.27      | -0.28                           | -0.45 | -0.12                           | -0.22   |
| Overweight (25 $\leq$ BMI $< 30$ ) (%)                        | 0.36                   | 0.36      | 0.10                            | 0.19  | 0.03                            | 0.06    |
| Ever-smoked                                                   | 0.47                   | 0.38      | -0.04                           | -0.05 | -0.02                           | -0.02   |
| Smoking now                                                   | 0.09                   | 0.05      | -0.07                           | -0.07 | -0.01                           | -0.00   |
| Diabetes                                                      | 0.26                   | 0.26      | -0.19                           | -0.29 | -0.06                           | -0.11   |
| Heart disease                                                 | 0.27                   | 0.28      | -0.03                           | -0.06 | -0.01                           | -0.02   |
| Hypertension                                                  | 0.63                   | 0.65      | -0.03                           | -0.05 | -0.02                           | -0.04   |
| <b>Labor participation for ages 51+</b>                       |                        |           |                                 |       |                                 |         |
| Working (%)                                                   | 0.41                   | 0.40      | 0.02                            | 0.01  | 0.01                            | 0.00    |
| Average earnings if working (\$2010)                          | 53,446.14              | 67,163.41 | 0.00                            | -0.00 | 163.26                          | -25.98  |
| <b>Government revenues from ages 51+ (Billion \$2010)</b>     |                        |           |                                 |       |                                 |         |
| Federal personal income taxes                                 | 610.25                 | 1,004.72  | 0.01                            | 0.03  | 4.16                            | 26.89   |
| Social security payroll taxes                                 | 178.12                 | 276.43    | 0.02                            | 0.03  | 3.92                            | 9.03    |
| Medicare payroll taxes                                        | 43.14                  | 65.11     | 0.02                            | 0.03  | 0.95                            | 2.14    |
| Total Revenue                                                 |                        |           |                                 |       |                                 |         |
| <b>Government expenditures from ages 51+ (Billion \$2010)</b> |                        |           |                                 |       |                                 |         |
| Old Age and Survivors Insurance benefits (OASI)               | 1,146.40               | 1,673.15  | 0.00                            | 0.04  | 1.78                            | 61.87   |
| Disability Insurance benefits (DI)                            | 40.10                  | 55.71     | -0.09                           | -0.11 | -3.84                           | -7.09   |
| Supplementary Security Income (SSI)                           | 25.78                  | 38.07     | -0.05                           | -0.03 | -1.49                           | -1.19   |
| Medicare costs                                                | 1,210.02               | 2,326.32  | -0.02                           | -0.03 | -19.94                          | -71.96  |
| Medicaid costs                                                | 289.70                 | 708.29    | -0.03                           | -0.04 | -7.76                           | -29.24  |
| Medicare + Medicaid                                           |                        |           |                                 |       |                                 |         |
| Total medical costs for ages 51+ (Billion \$2010)             | 2,740.44               | 5,396.33  | -0.02                           | -0.03 | -65.85                          | -185.51 |

Table 23: Simulation results for obesity reduction scenario compared to status quo

| Calendar year | National Wage Index | Real interest rate on wealth | COLA     | Consumer Price Index | Substantial Gainful Activity | Y-o-Y excess real growth in medical costs |
|---------------|---------------------|------------------------------|----------|----------------------|------------------------------|-------------------------------------------|
| 2004          | 35648.55            | 154.7553                     | 3.606042 | 188.9                | 9720                         | .015                                      |
| 2005          | 36952.94            | 157.0766                     | 3.703405 | 195.3                | 9960                         | .0148                                     |
| 2006          | 38651.41            | 158.3332                     | 3.855245 | 201.6                | 10320                        | .0147                                     |
| 2007          | 40405.48            | 160.0749                     | 3.982468 | 207.342              | 10800                        | .0145                                     |
| 2008          | 41334.97            | 163.1163                     | 4.074064 | 215.303              | 11280                        | .0143                                     |
| 2009          | 42188.9             | 163.7688                     | 4.31036  | 214.537              | 11760                        | .0141                                     |
| 2010          | 42907.15            | 171.4659                     | 4.31036  | 214.537              | 12000                        | .0139                                     |
| 2011          | 43620.13            | 173.6949                     | 4.31036  | 214.537              | 12000                        | .0138                                     |
| 2012          | 44197.64            | 176.4741                     | 4.31036  | 214.537              | 12120                        | .0136                                     |
| 2013          | 44678.93            | 180.533                      | 4.31036  | 214.537              | 12480                        | .0134                                     |
| 2014          | 45126.4             | 185.2268                     | 4.31036  | 214.537              | 12840                        | .0133                                     |
| 2015          | 45737.88            | 190.7836                     | 4.31036  | 214.537              | 13080                        | .0131                                     |
| 2016          | 46166.54            | 196.8887                     | 4.31036  | 214.537              | 12699.34                     | .0129                                     |
| 2017          | 46633.77            | 202.5985                     | 4.31036  | 214.537              | 12827.86                     | .0128                                     |
| 2018          | 47117.93            | 208.2712                     | 4.31036  | 214.537              | 12961.05                     | .0126                                     |
| 2019          | 47609.11            | 214.1028                     | 4.31036  | 214.537              | 13096.16                     | .0124                                     |
| 2020          | 48107.48            | 220.0977                     | 4.31036  | 214.537              | 13233.25                     | .0122                                     |
| 2021          | 48615.77            | 226.2604                     | 4.31036  | 214.537              | 13373.07                     | .0121                                     |
| 2022          | 49124.07            | 232.5957                     | 4.31036  | 214.537              | 13512.89                     | .0119                                     |
| 2023          | 49625.12            | 239.1084                     | 4.31036  | 214.537              | 13650.72                     | .0117                                     |
| 2024          | 50148.08            | 245.8035                     | 4.31036  | 214.537              | 13794.57                     | .0115                                     |
| 2025          | 50681.91            | 252.6859                     | 4.31036  | 214.537              | 13941.41                     | .0114                                     |
| 2026          | 51221.7             | 259.7611                     | 4.31036  | 214.537              | 14089.9                      | .0112                                     |
| 2027          | 51773.64            | 267.0345                     | 4.31036  | 214.537              | 14241.72                     | .011                                      |
| 2028          | 52331.86            | 274.5114                     | 4.31036  | 214.537              | 14395.28                     | .0109                                     |
| 2029          | 52896.8             | 282.1978                     | 4.31036  | 214.537              | 14550.68                     | .0107                                     |
| 2030          | 53472.1             | 290.0993                     | 4.31036  | 214.537              | 14708.93                     | .0105                                     |
| 2031          | 54060.84            | 298.2221                     | 4.31036  | 214.537              | 14870.88                     | .0104                                     |
| 2032          | 54659.91            | 306.5723                     | 4.31036  | 214.537              | 15035.67                     | .0101                                     |
| 2033          | 55273.43            | 315.1563                     | 4.31036  | 214.537              | 15204.43                     | .01                                       |
| 2034          | 55892.85            | 323.9807                     | 4.31036  | 214.537              | 15374.82                     | .0097                                     |
| 2035          | 56518.25            | 333.0521                     | 4.31036  | 214.537              | 15546.86                     | .0094                                     |
| 2036          | 57149.05            | 342.3776                     | 4.31036  | 214.537              | 15720.37                     | .0091                                     |
| 2037          | 57790.2             | 351.9642                     | 4.31036  | 214.537              | 15896.74                     | .0088                                     |
| 2038          | 58444.8             | 361.8192                     | 4.31036  | 214.537              | 16076.81                     | .0085                                     |
| 2039          | 59104.39            | 371.9501                     | 4.31036  | 214.537              | 16258.24                     | .0082                                     |
| 2040          | 59771.73            | 382.3647                     | 4.31036  | 214.537              | 16441.81                     | .0079                                     |
| 2041          | 60445.75            | 393.0709                     | 4.31036  | 214.537              | 16627.22                     | .0076                                     |
| 2042          | 61127.12            | 404.0769                     | 4.31036  | 214.537              | 16814.65                     | .0073                                     |
| 2043          | 61816.84            | 415.3911                     | 4.31036  | 214.537              | 17004.37                     | .007                                      |
| 2044          | 62511.55            | 427.022                      | 4.31036  | 214.537              | 17195.47                     | .0067                                     |
| 2045          | 63211.19            | 438.9786                     | 4.31036  | 214.537              | 17387.93                     | .0064                                     |
| 2046          | 63917.93            | 451.27                       | 4.31036  | 214.537              | 17582.33                     | .0061                                     |
| 2047          | 64628.21            | 463.9056                     | 4.31036  | 214.537              | 17777.72                     | .0058                                     |
| 2048          | 65348.03            | 476.895                      | 4.31036  | 214.537              | 17975.72                     | .0055                                     |
| 2049          | 66072.87            | 490.248                      | 4.31036  | 214.537              | 18175.11                     | .0052                                     |
| 2050          | 66803.52            | 503.9749                     | 4.31036  | 214.537              | 18376.09                     | .0049                                     |

Table 24: Assumptions for each calendar year

| Birth year | Normal Retirement Age | Delayed Retirement Credit |
|------------|-----------------------|---------------------------|
| 1890       | 780                   | .03                       |
| 1891       | 780                   | .03                       |
| 1892       | 780                   | .03                       |
| 1893       | 780                   | .03                       |
| 1894       | 780                   | .03                       |
| 1895       | 780                   | .03                       |
| 1896       | 780                   | .03                       |
| 1897       | 780                   | .03                       |
| 1898       | 780                   | .03                       |
| 1899       | 780                   | .03                       |
| 1900       | 780                   | .03                       |
| 1901       | 780                   | .03                       |
| 1902       | 780                   | .03                       |
| 1903       | 780                   | .03                       |
| 1904       | 780                   | .03                       |
| 1905       | 780                   | .03                       |
| 1906       | 780                   | .03                       |
| 1907       | 780                   | .03                       |
| 1908       | 780                   | .03                       |
| 1909       | 780                   | .03                       |
| 1910       | 780                   | .03                       |
| 1911       | 780                   | .03                       |
| 1912       | 780                   | .03                       |
| 1913       | 780                   | .03                       |
| 1914       | 780                   | .03                       |
| 1915       | 780                   | .03                       |
| 1916       | 780                   | .03                       |
| 1917       | 780                   | .03                       |
| 1918       | 780                   | .03                       |
| 1919       | 780                   | .03                       |
| 1920       | 780                   | .03                       |
| 1921       | 780                   | .03                       |
| 1922       | 780                   | .03                       |
| 1923       | 780                   | .03                       |
| 1924       | 780                   | .03                       |
| 1925       | 780                   | .035                      |
| 1926       | 780                   | .035                      |
| 1927       | 780                   | .04                       |
| 1928       | 780                   | .04                       |
| 1929       | 780                   | .045                      |
| 1930       | 780                   | .045                      |
| 1931       | 780                   | .05                       |
| 1932       | 780                   | .05                       |
| 1933       | 780                   | .055                      |
| 1934       | 780                   | .055                      |
| 1935       | 780                   | .06                       |
| 1936       | 780                   | .06                       |
| 1937       | 780                   | .065                      |
| 1938       | 782                   | .065                      |
| 1939       | 784                   | .07                       |
| 1940       | 786                   | .07                       |
| 1941       | 788                   | .075                      |
| 1942       | 790                   | .075                      |
| 1943       | 792                   | .08                       |
| 1944       | 792                   | .08                       |
| 1945       | 792                   | .08                       |
| 1946       | 792                   | .08                       |
| 1947       | 792                   | .08                       |
| 1948       | 792                   | .08                       |
| 1949       | 792                   | .08                       |
| 1950       | 792                   | .08                       |
| 1951       | 792                   | .08                       |
| 1952       | 792                   | .08                       |
| 1953       | 792                   | .08                       |
| 1954       | 792                   | .08                       |
| 1955       | 794                   | .08                       |
| 1956       | 796                   | .08                       |
| 1957       | 798                   | .08                       |
| 1958       | 800                   | .08                       |
| 1959       | 802                   | .08                       |
| 1960       | 804                   | .08                       |

Table 25: Assumptions for each birth year. In years after 1960, all values are held constant at their 1960 levels.

## References

- Atherly, A., Dowd, B. E., and Feldman, R. (2004). The effect of benefits, premiums, and health risk on health plan choice in the medicare program. *Health services research*, 39(4p1):847–864.
- Brazier, J. E. and Roberts, J. (2004). The estimation of a preference-based measure of health from the sf-12. *Medical care*, 42(9):851–859.
- Buchmueller, T. (2006). Price and the health plan choices of retirees. *Journal of Health Economics*, 25(1):81–101.
- Dolan, P. (1997). Modeling valuations for euroqol health states. *Medical care*, 35(11):1095–1108.
- Fryback, D. G., Dunham, N. C., Palta, M., Hanmer, J., Buechner, J., Cherepanov, D., Herrington, S., Hays, R. D., Kaplan, R. M., Ganiats, T. G., et al. (2007). Us norms for six generic health-related quality-of-life indexes from the national health measurement study. *Medical care*, 45(12):1162–1170.
- Goldman, D. P., Shekelle, P. G., Bhattacharya, J., Hurd, M., and Joyce, G. F. (2004). Health status and medical treatment of the future elderly. Technical report, DTIC Document.
- Honeycutt, A. A., Boyle, J. P., Broglio, K. R., Thompson, T. J., Hoerger, T. J., Geiss, L. S., and Narayan, K. V. (2003). A dynamic markov model for forecasting diabetes prevalence in the united states through 2050. *Health care management science*, 6(3):155–164.
- Kapteyn, A., Michaud, P.-C., Smith, J. P., and Van Soest, A. (2006). Effects of attrition and non-response in the health and retirement study.
- Levy, D. (2006). Trends in smoking rates under different tobacco control policies: results from the SimSmoke tobacco policy simulation model.
- MacKinnon, J. G. and Magee, L. (1990). Transforming the dependent variable in regression models. *International Economic Review*, pages 315–339.
- Mainous III, A., Baker, R., Koopman, R., Saxena, S., Diaz, V., Everett, C., and Majeed, A. (2007). Impact of the population at risk of diabetes on projections of diabetes burden in the united states: an epidemic on the way. *Diabetologia*, 50(5):934–940.
- Poterba, J., Venti, S., and Wise, D. A. (2007). The decline of defined benefit retirement plans and asset flows. Technical report, National Bureau of Economic Research.
- Poterba, J. M., Venti, S. F., and Wise, D. A. (2008). New estimates of the future path of 401 (k) assets. In *Tax Policy and the Economy, Volume 22*, pages 43–80. University of Chicago Press.
- Poterba, J. M., Venti, S. F., and Wise, D. A. (2009). The decline of defined benefit retirement plans and asset flows. In *Social Security policy in a changing environment*, pages 333–379. University of Chicago Press.
- Roodman, D. (2011). Fitting fully observed recursive mixed-process models with cmp. *Stata Journal*, 11(2):159–206(48).

- Ruhm, C. J. (2007). Current and future prevalence of obesity and severe obesity in the united states. In *Forum for Health Economics & Policy*, volume 10.
- Selden, T. M. and Sing, M. (2008). Aligning the Medical Expenditure Panel Survey to aggregate us benchmarks. Technical report, Agency for Healthcare Research and Quality.
- Shaw, J. W., Johnson, J. A., and Coons, S. J. (2005). Us valuation of the eq-5d health states: development and testing of the d1 valuation model. *Medical care*, 43(3):203–220.
- Wooldridge, J. M. (2000). A framework for estimating dynamic, unobserved effects panel data models with possible feedback to future explanatory variables. *Economics Letters*, 68(3):245–250.

This file provides supplementary details for the paper:

**Title:** Measuring the COVID-19 Mortality Burden in the United States: A Microsimulation Study

**Authors:** Julian Reif, Hanke Heun-Johnson, Bryan Tysinger, and Darius Lakdawalla

The following sheets contain transition model estimates for relevant variables in the Future Elderly Model, for population ages 55 and over in 2020.

**Binaries**

This worksheet reports estimates of the probability of dying, of developing a chronic condition (stroke, heart disease, cancer, hypertension, diabetes, lung disease, and congestive heart failure), of having a heart attack, and of living in a nursing home.

**Ordered Probits**

This worksheet reports estimates of the probability of changing smoking status, and of changing ADL and IADL status.

**OLS**

This worksheet reports estimates of how BMI is updated in the microsimulation.





|                                                                                     | ive heart | R live in nursing | R live in nursing         |
|-------------------------------------------------------------------------------------|-----------|-------------------|---------------------------|
|                                                                                     | (chfe)    | home at interview | home at interview         |
| l effects                                                                           | (nhmliv)  | coefficients      | (nhmliv) marginal effects |
|                                                                                     | p-value   | coef              | p-value                   |
| Non-Hispanic black                                                                  | -0.328*** | 0.047             | -0.002                    |
| Hispanic                                                                            | -0.485*** | 0.067             | -0.003                    |
| Less than high school                                                               | -0.040    | 0.038             | -0.000                    |
| Some college and above                                                              | 0.010     | 0.036             | 0.000                     |
| Male                                                                                | -0.099*** | 0.046             | -0.001                    |
| Male AND Less than high school                                                      | 0.023     | 0.064             | 0.000                     |
| Male AND Non-Hispanic black                                                         | 0.343***  | 0.072             | 0.005                     |
| Male AND Hispanic                                                                   | 0.172     | 0.109             | 0.002                     |
| Male AND Some college and above                                                     | 0.014     | 0.061             | 0.000                     |
| Min(B3, two-year lag of age)                                                        | 0.038***  | 0.009             | 0.000                     |
| Min(Max(0, two-year lag age - 63), 73 - 63)                                         | 0.048***  | 0.005             | 0.000                     |
| Min(Max(0, two-year lag age - 73), 83 - 73)                                         |           |                   |                           |
| Max(0, two-year lag age - 83)                                                       |           |                   |                           |
| Two-year lag of Heart disease                                                       | -0.045    | 0.027             | -0.000                    |
| Two-year lag of Stroke                                                              | 0.175***  | 0.032             | 0.002                     |
| Two-year lag of Cancer                                                              | -0.050    | 0.033             | -0.000                    |
| Two-year lag of Hypertension                                                        | -0.031    | 0.026             | -0.000                    |
| Two-year lag of Diabetes                                                            | 0.105***  | 0.031             | 0.001                     |
| Two-year lag of Lung disease                                                        | -0.053    | 0.040             | -0.000                    |
| Two-year lag of R had heart attack since last wave                                  |           |                   |                           |
| Two-year lag of Has exactly 1 IADL                                                  | 0.400***  | 0.036             | 0.006                     |
| Two-year lag of Has 2 or more IADLs                                                 | 0.810***  | 0.039             | 0.022                     |
| Two-year lag of Has exactly 1 ADL                                                   | 0.220***  | 0.036             | 0.003                     |
| Two-year lag of Has exactly 2 ADLs                                                  | 0.348***  | 0.044             | 0.005                     |
| Two-year lag of Has 3 or more ADLs                                                  | 0.456***  | 0.038             | 0.007                     |
| Two-year lag of Current smoking                                                     |           |                   |                           |
| Two-year lag of Widowed                                                             | 0.143***  | 0.028             | 0.001                     |
| Heart problem status at age 50 (1/0)imputed                                         | 0.240***  | 0.105             | 0.003                     |
| Stroke status at age 50 (1/0)imputed                                                | 0.027     | 0.265             | 0.000                     |
| Cancer status at age 50 (1/0)imputed                                                | 0.087     | 0.088             | 0.001                     |
| High blood pressure status at age 50 (1/0)imputed                                   | 0.022     | 0.084             | 0.000                     |
| Diabetes status at age 50 (imputed)                                                 | 0.135**   | 0.059             | 0.001                     |
| Lung disease status at age 50 (1/0)imputed                                          | -0.051    | 0.259             | -0.000                    |
| init. of Ever smoked                                                                | 0.060**   | 0.030             | 0.001                     |
| Smoking status at age 50 (imputed)                                                  | -0.009    | 0.033             | -0.000                    |
| Two-year lag of Ever had congestive heart failure (missing for 1993 AHEAD wave)     |           |                   |                           |
| male_i2age65i                                                                       |           |                   |                           |
| male_i2age6574                                                                      |           |                   |                           |
| male_i2age7584                                                                      |           |                   |                           |
| male_i2age859                                                                       |           |                   |                           |
| Male AND Two-year lag of Ever had congestive heart failure (missing for 1993 AHEAD) |           |                   |                           |
| Male AND Two-year lag of Heart disease                                              |           |                   |                           |
| Male AND Two-year lag of Stroke                                                     |           |                   |                           |
| Male AND Two-year lag of Cancer                                                     |           |                   |                           |
| Male AND Two-year lag of Hypertension                                               |           |                   |                           |
| Male AND Two-year lag of Diabetes                                                   |           |                   |                           |
| Male AND Two-year lag of Lung disease                                               |           |                   |                           |
| Male AND Two-year lag of R had heart attack since last wave                         |           |                   |                           |
| Male AND Two-year lag of Has exactly 1 IADL                                         |           |                   |                           |
| Male AND Two-year lag of Has 2 or more IADLs                                        |           |                   |                           |
| Male AND Two-year lag of Has exactly 1 ADL                                          |           |                   |                           |
| Male AND Two-year lag of Has exactly 2 ADLs                                         |           |                   |                           |
| Male AND Two-year lag of Has 3 or more ADLs                                         |           |                   |                           |
| Male AND Two-year lag of Current smoking                                            |           |                   |                           |
| Male AND Two-year lag of Widowed                                                    |           |                   |                           |
| Male AND Heart problem status at age 50 (1/0)imputed                                |           |                   |                           |
| Male AND Stroke status at age 50 (1/0)imputed                                       |           |                   |                           |
| Male AND Cancer status at age 50 (1/0)imputed                                       |           |                   |                           |
| Male AND High blood pressure status at age 50 (1/0)imputed                          |           |                   |                           |
| Male AND Diabetes status at age 50 (imputed)                                        |           |                   |                           |
| Male AND Lung disease status at age 50 (1/0)imputed                                 |           |                   |                           |
| Male AND init. of Ever smoked                                                       |           |                   |                           |
| Male AND Smoking status at age 50 (imputed)                                         |           |                   |                           |
| Max(0, two-year lag age - 73)                                                       | 0.050***  | 0.002             | 0.000                     |
| Spined two-year lag of BMI <= log(30)                                               |           |                   |                           |
| Spined two-year lag of BMI > log(30)                                                |           |                   |                           |
| Spined init of BMI age 50 <= log(30)                                                |           |                   |                           |
| Spined init of BMI age 50 > log(30)                                                 |           |                   |                           |
| Log of years between current interview and previous                                 | 0.874***  | 0.074             | 0.008                     |
| black_i2heartae                                                                     |           |                   |                           |
| hispan_i2heartae                                                                    |           |                   |                           |
| hsless_i2heartae                                                                    |           |                   |                           |
| college_i2heartae                                                                   |           |                   |                           |
| male_i2heartae                                                                      |           |                   |                           |
| male_hsless_i2heartae                                                               |           |                   |                           |
| male_black_i2heartae                                                                |           |                   |                           |
| male_hispan_i2heartae                                                               |           |                   |                           |
| i2age65i_i2heartae                                                                  |           |                   |                           |
| i2age6574_i2heartae                                                                 |           |                   |                           |
| i2age75p_i2heartae                                                                  |           |                   |                           |
| i2hsless_i2heartae                                                                  |           |                   |                           |
| i2college_i2heartae                                                                 |           |                   |                           |
| i2smoken_i2heartae                                                                  |           |                   |                           |
| i2widowed_i2heartae                                                                 |           |                   |                           |
| fatmo50_i2heartae                                                                   |           |                   |                           |
| franc50_i2heartae                                                                   |           |                   |                           |
| hisp50_i2heartae                                                                    |           |                   |                           |
| idabe50_i2heartae                                                                   |           |                   |                           |
| lung50_i2heartae                                                                    |           |                   |                           |
| heart50_i2heartae                                                                   |           |                   |                           |
| fmokex_i2heartae                                                                    |           |                   |                           |
| fmokex50_i2heartae                                                                  |           |                   |                           |
| i2logbmi_30p_i2heartae                                                              |           |                   |                           |
| i2logbmi_30p_i2heartae                                                              |           |                   |                           |
| logdelage_i2heartae                                                                 |           |                   |                           |
| Two-year lag of Non-pension with(hatota) not zero                                   | -0.137*** | 0.051             | -0.001                    |
| Two-year lag of (IHT of hh with in 1000s if positive)100 zero otherwise             | -4.872*** | 0.484             | -0.044                    |
| Two-year lag of R live in nursing home at interview                                 | 2.275***  | 0.052             | 0.304                     |
| _cons                                                                               | -6.656*** | 0.553             |                           |

note: \* 01 - \*\*; \*\* - \*\*\*; - \*; - . - .;

|                                                     | Smoking status<br>(smkstat)<br>coefficients |         | Smoking status (smkstat) marginal effects |         |        |         |        |         | ADL status (adlstat)<br>coefficients |         |        |
|-----------------------------------------------------|---------------------------------------------|---------|-------------------------------------------|---------|--------|---------|--------|---------|--------------------------------------|---------|--------|
|                                                     | coef                                        | p-value | coef                                      | p-value | coef   | p-value | coef   | p-value | coef                                 | p-value | coef   |
|                                                     |                                             |         |                                           |         |        |         |        |         |                                      |         |        |
| Non-Hispanic black                                  | -0.027*                                     | 0.014   | 0.007                                     |         | -0.007 |         | -0.000 |         | 0.113***                             | 0.016   | -0.025 |
| Hispanic                                            | -0.174***                                   | 0.019   | 0.047                                     |         | -0.047 |         | -0.000 |         | 0.145***                             | 0.020   | -0.033 |
| Less than high school                               | 0.012                                       | 0.015   | -0.003                                    |         | 0.003  |         | 0.000  |         | 0.125***                             | 0.015   | -0.028 |
| Some college and above                              | 0.093***                                    | 0.012   | -0.024                                    |         | 0.023  |         | 0.000  |         | -0.041***                            | 0.014   | 0.009  |
| Male                                                | 0.503***                                    | 0.014   | -0.123                                    |         | 0.121  |         | 0.002  |         | -0.056***                            | 0.017   | 0.012  |
| Male AND Less than high school                      | 0.031                                       | 0.023   | -0.008                                    |         | 0.008  |         | 0.000  |         | -0.030                               | 0.025   | 0.006  |
| Male AND Non-Hispanic black                         | -0.158***                                   | 0.023   | 0.043                                     |         | -0.042 |         | -0.000 |         | 0.001                                | 0.026   | -0.000 |
| Male AND Hispanic                                   | 0.128***                                    | 0.028   | -0.031                                    |         | 0.030  |         | 0.000  |         | -0.026                               | 0.032   | 0.006  |
| Male AND Some college and above                     | -0.248***                                   | 0.018   | 0.068                                     |         | -0.067 |         | -0.000 |         | -0.035                               | 0.022   | 0.007  |
| Min(63, two-year lag of age)                        | 0.008***                                    | 0.001   | -0.002                                    |         | 0.002  |         | 0.000  |         | 0.007***                             | 0.002   | -0.002 |
| Min(Max(0, two-year lag age - 63), 73 - 63)         | 0.003**                                     | 0.001   | -0.001                                    |         | 0.001  |         | 0.000  |         | 0.017***                             | 0.002   | -0.004 |
| Max(0, two-year lag age - 73)                       | -0.010***                                   | 0.001   | 0.002                                     |         | -0.002 |         | -0.000 |         | 0.041***                             | 0.001   | -0.009 |
| Two-year lag of Heart disease                       | 0.071***                                    | 0.011   | -0.018                                    |         | 0.018  |         | 0.000  |         | 0.129***                             | 0.012   | -0.029 |
| Two-year lag of Stroke                              | 0.036**                                     | 0.016   | -0.009                                    |         | 0.009  |         | 0.000  |         | 0.253***                             | 0.016   | -0.061 |
| Two-year lag of Cancer                              | 0.060***                                    | 0.013   | -0.015                                    |         | 0.015  |         | 0.000  |         | 0.054***                             | 0.014   | -0.012 |
| Two-year lag of Hypertension                        | -0.007                                      | 0.009   | 0.002                                     |         | -0.002 |         | -0.000 |         | 0.051***                             | 0.010   | -0.011 |
| Two-year lag of Diabetes                            | -0.019                                      | 0.012   | 0.005                                     |         | -0.005 |         | -0.000 |         | 0.081***                             | 0.013   | -0.018 |
| Two-year lag of Lung disease                        | 0.214***                                    | 0.016   | -0.050                                    |         | 0.049  |         | 0.001  |         | 0.235***                             | 0.015   | -0.057 |
| Two-year lag of R had heart attack since last wave  | 0.095***                                    | 0.031   | -0.023                                    |         | 0.023  |         | 0.000  |         | 0.032                                | 0.031   | -0.007 |
| Two-year lag of Has exactly 1 IADL                  | -0.008                                      | 0.019   | 0.002                                     |         | -0.002 |         | -0.000 |         | 0.345***                             | 0.017   | -0.087 |
| Two-year lag of Has 2 or more IADLs                 | -0.068**                                    | 0.027   | 0.018                                     |         | -0.018 |         | -0.000 |         | 0.712***                             | 0.024   | -0.209 |
| Two-year lag of Has exactly 1 ADL                   | 0.034**                                     | 0.015   | -0.008                                    |         | 0.008  |         | 0.000  |         | 1.049***                             | 0.013   | -0.328 |
| Two-year lag of Has exactly 2 ADLs                  | 0.029                                       | 0.022   | -0.007                                    |         | 0.007  |         | 0.000  |         | 1.494***                             | 0.018   | -0.508 |
| Two-year lag of Has 3 or more ADLs                  | -0.032                                      | 0.021   | 0.008                                     |         | -0.008 |         | -0.000 |         | 2.080***                             | 0.019   | -0.696 |
| Two-year lag of Current smoking                     | 2.558***                                    | 0.017   | -0.277                                    |         | 0.117  |         | 0.160  |         | 0.098***                             | 0.016   | -0.022 |
| Two-year lag of Widowed                             | -0.031***                                   | 0.012   | 0.008                                     |         | -0.008 |         | -0.000 |         | 0.034***                             | 0.013   | -0.008 |
| Heart problem status at age 50 (1/0)-imputed        | 0.063*                                      | 0.037   | -0.015                                    |         | 0.015  |         | 0.000  |         | 0.041                                | 0.038   | -0.009 |
| Stroke status at age 50 (1/0)-imputed               | 0.258***                                    | 0.080   | -0.058                                    |         | 0.057  |         | 0.001  |         | -0.018                               | 0.080   | 0.004  |
| Cancer status at age 50 (1/0)-imputed               | 0.017                                       | 0.025   | -0.004                                    |         | 0.004  |         | 0.000  |         | 0.076***                             | 0.028   | -0.017 |
| High blood pressure status at age 50 (1/0)-imputed  | -0.008                                      | 0.019   | 0.002                                     |         | -0.002 |         | -0.000 |         | 0.017                                | 0.021   | -0.004 |
| Diabetes status at age 50 (imputed)                 | 0.030                                       | 0.019   | -0.007                                    |         | 0.007  |         | 0.000  |         | 0.124***                             | 0.020   | -0.028 |
| Lung disease status at age 50 (1/0)-imputed         | -0.169***                                   | 0.060   | 0.046                                     |         | -0.046 |         | -0.000 |         | 0.021                                | 0.059   | -0.005 |
| Smoking status at age 50 (imputed)                  | 2.880***                                    | 0.033   | -0.482                                    |         | 0.371  |         | 0.112  |         | 0.078***                             | 0.014   | -0.017 |
| Splined two-year lag of BMI <= log(30)              | -0.098*                                     | 0.051   | 0.025                                     |         | -0.025 |         | -0.000 |         | -0.430***                            | 0.055   | 0.093  |
| Splined two-year lag of BMI > log(30)               | 0.331***                                    | 0.067   | -0.084                                    |         | 0.083  |         | 0.001  |         | 0.724***                             | 0.067   | -0.157 |
| Splined init of BMI age 50 <= log(30)               | 0.122**                                     | 0.051   | -0.031                                    |         | 0.031  |         | 0.000  |         | 0.669***                             | 0.056   | -0.145 |
| Splined init of BMI age 50 > log(30)                | -0.354***                                   | 0.072   | 0.090                                     |         | -0.089 |         | -0.001 |         | 0.370***                             | 0.071   | -0.080 |
| Log of years between current interview and previous | -0.043*                                     | 0.023   | 0.011                                     |         | -0.011 |         | -0.000 |         | 0.218***                             | 0.027   | -0.047 |
| Init. of Ever smoked                                |                                             |         |                                           |         |        |         |        |         | -0.001                               | 0.012   | 0.000  |

note: .01 - \*\*\*, .05 - \*\*, .1 - \*;

|                                                     | ADL status (adlstat) marginal effects |        |         |        |         | IADL status (iadlstat) coefficients |         |           |         |      | IADL sta |  |
|-----------------------------------------------------|---------------------------------------|--------|---------|--------|---------|-------------------------------------|---------|-----------|---------|------|----------|--|
|                                                     | p-value                               | coef   | p-value | coef   | p-value | coef                                | p-value | coef      | p-value | coef | p-value  |  |
| Non-Hispanic black                                  |                                       | 0.014  |         | 0.006  |         | 0.005                               |         | 0.113***  | 0.020   |      | -0.014   |  |
| Hispanic                                            |                                       | 0.018  |         | 0.008  |         | 0.007                               |         | 0.195***  | 0.024   |      | -0.026   |  |
| Less than high school                               |                                       | 0.016  |         | 0.007  |         | 0.006                               |         | 0.193***  | 0.019   |      | -0.025   |  |
| Some college and above                              |                                       | -0.005 |         | -0.002 |         | -0.002                              |         | -0.029    | 0.018   |      | 0.003    |  |
| Male                                                |                                       | -0.007 |         | -0.003 |         | -0.002                              |         | 0.100***  | 0.021   |      | -0.012   |  |
| Male AND Less than high school                      |                                       | -0.004 |         | -0.002 |         | -0.001                              |         | 0.007     | 0.029   |      | -0.001   |  |
| Male AND Non-Hispanic black                         |                                       | 0.000  |         | 0.000  |         | 0.000                               |         | -0.013    | 0.031   |      | 0.001    |  |
| Male AND Hispanic                                   |                                       | -0.003 |         | -0.001 |         | -0.001                              |         | -0.087**  | 0.037   |      | 0.010    |  |
| Male AND Some college and above                     |                                       | -0.004 |         | -0.002 |         | -0.001                              |         | -0.087*** | 0.027   |      | 0.010    |  |
| Min(63, two-year lag of age)                        |                                       | 0.001  |         | 0.000  |         | 0.000                               |         | -0.009*** | 0.002   |      | 0.001    |  |
| Min(Max(0, two-year lag age - 63), 73 - 63)         |                                       | 0.002  |         | 0.001  |         | 0.001                               |         | 0.023***  | 0.002   |      | -0.003   |  |
| Max(0, two-year lag age - 73)                       |                                       | 0.005  |         | 0.002  |         | 0.002                               |         | 0.047***  | 0.001   |      | -0.006   |  |
| Two-year lag of Heart disease                       |                                       | 0.016  |         | 0.007  |         | 0.006                               |         | 0.068***  | 0.014   |      | -0.008   |  |
| Two-year lag of Stroke                              |                                       | 0.033  |         | 0.015  |         | 0.013                               |         | 0.294***  | 0.018   |      | -0.042   |  |
| Two-year lag of Cancer                              |                                       | 0.007  |         | 0.003  |         | 0.002                               |         | 0.011     | 0.017   |      | -0.001   |  |
| Two-year lag of Hypertension                        |                                       | 0.006  |         | 0.003  |         | 0.002                               |         | 0.035***  | 0.013   |      | -0.004   |  |
| Two-year lag of Diabetes                            |                                       | 0.010  |         | 0.004  |         | 0.004                               |         | 0.116***  | 0.015   |      | -0.014   |  |
| Two-year lag of Lung disease                        |                                       | 0.030  |         | 0.014  |         | 0.012                               |         | 0.087***  | 0.019   |      | -0.011   |  |
| Two-year lag of R had heart attack since last wave  |                                       | 0.004  |         | 0.002  |         | 0.001                               |         | 0.025     | 0.036   |      | -0.003   |  |
| Two-year lag of Has exactly 1 IADL                  |                                       | 0.045  |         | 0.022  |         | 0.020                               |         | 1.102***  | 0.017   |      | -0.250   |  |
| Two-year lag of Has 2 or more IADLs                 |                                       | 0.095  |         | 0.054  |         | 0.060                               |         | 1.988***  | 0.024   |      | -0.591   |  |
| Two-year lag of Has exactly 1 ADL                   |                                       | 0.133  |         | 0.084  |         | 0.111                               |         | 0.331***  | 0.018   |      | -0.048   |  |
| Two-year lag of Has exactly 2 ADLs                  |                                       | 0.149  |         | 0.125  |         | 0.234                               |         | 0.484***  | 0.023   |      | -0.079   |  |
| Two-year lag of Has 3 or more ADLs                  |                                       | 0.119  |         | 0.144  |         | 0.432                               |         | 0.653***  | 0.021   |      | -0.118   |  |
| Two-year lag of Current smoking                     |                                       | 0.012  |         | 0.005  |         | 0.004                               |         | 0.094***  | 0.020   |      | -0.012   |  |
| Two-year lag of Widowed                             |                                       | 0.004  |         | 0.002  |         | 0.001                               |         | 0.018     | 0.015   |      | -0.002   |  |
| Heart problem status at age 50 (1/0)-imputed        |                                       | 0.005  |         | 0.002  |         | 0.002                               |         | 0.024     | 0.048   |      | -0.003   |  |
| Stroke status at age 50 (1/0)-imputed               |                                       | -0.002 |         | -0.001 |         | -0.001                              |         | 0.033     | 0.091   |      | -0.004   |  |
| Cancer status at age 50 (1/0)-imputed               |                                       | 0.010  |         | 0.004  |         | 0.003                               |         | 0.038     | 0.036   |      | -0.005   |  |
| High blood pressure status at age 50 (1/0)-imputed  |                                       | 0.002  |         | 0.001  |         | 0.001                               |         | 0.023     | 0.027   |      | -0.003   |  |
| Diabetes status at age 50 (imputed)                 |                                       | 0.016  |         | 0.007  |         | 0.006                               |         | 0.112***  | 0.025   |      | -0.014   |  |
| Lung disease status at age 50 (1/0)-imputed         |                                       | 0.003  |         | 0.001  |         | 0.001                               |         | -0.019    | 0.076   |      | 0.002    |  |
| Smoking status at age 50 (imputed)                  |                                       | 0.010  |         | 0.004  |         | 0.003                               |         | 0.011     | 0.017   |      | -0.001   |  |
| Splined two-year lag of BMI <= log(30)              |                                       | -0.053 |         | -0.022 |         | -0.018                              |         | -0.841*** | 0.064   |      | 0.099    |  |
| Splined two-year lag of BMI > log(30)               |                                       | 0.089  |         | 0.038  |         | 0.030                               |         | -0.192**  | 0.089   |      | 0.023    |  |
| Splined init of BMI age 50 <= log(30)               |                                       | 0.082  |         | 0.035  |         | 0.028                               |         | 0.564***  | 0.067   |      | -0.066   |  |
| Splined init of BMI age 50 > log(30)                |                                       | 0.045  |         | 0.019  |         | 0.016                               |         | 0.160*    | 0.091   |      | -0.019   |  |
| Log of years between current interview and previous |                                       | 0.027  |         | 0.011  |         | 0.009                               |         | 0.320***  | 0.033   |      | -0.038   |  |
| Init. of Ever smoked                                |                                       | -0.000 |         | -0.000 |         | -0.000                              |         | 0.009     | 0.015   |      | -0.001   |  |

note: .01 - \*\*\*, .05 - \*\*, .1 - \*;

## itus (iادلstat) marginal effects

|                                                     | coef   | p-value | coef   | p-value |
|-----------------------------------------------------|--------|---------|--------|---------|
| Non-Hispanic black                                  | 0.010  |         | 0.004  |         |
| Hispanic                                            | 0.019  |         | 0.007  |         |
| Less than high school                               | 0.018  |         | 0.007  |         |
| Some college and above                              | -0.003 |         | -0.001 |         |
| Male                                                | 0.009  |         | 0.003  |         |
| Male AND Less than high school                      | 0.001  |         | 0.000  |         |
| Male AND Non-Hispanic black                         | -0.001 |         | -0.000 |         |
| Male AND Hispanic                                   | -0.007 |         | -0.002 |         |
| Male AND Some college and above                     | -0.007 |         | -0.002 |         |
| Min(63, two-year lag of age)                        | -0.001 |         | -0.000 |         |
| Min(Max(0, two-year lag age - 63), 73 - 63)         | 0.002  |         | 0.001  |         |
| Max(0, two-year lag age - 73)                       | 0.004  |         | 0.001  |         |
| Two-year lag of Heart disease                       | 0.006  |         | 0.002  |         |
| Two-year lag of Stroke                              | 0.030  |         | 0.012  |         |
| Two-year lag of Cancer                              | 0.001  |         | 0.000  |         |
| Two-year lag of Hypertension                        | 0.003  |         | 0.001  |         |
| Two-year lag of Diabetes                            | 0.011  |         | 0.004  |         |
| Two-year lag of Lung disease                        | 0.008  |         | 0.003  |         |
| Two-year lag of R had heart attack since last wave  | 0.002  |         | 0.001  |         |
| Two-year lag of Has exactly 1 IADL                  | 0.149  |         | 0.100  |         |
| Two-year lag of Has 2 or more IADLs                 | 0.233  |         | 0.357  |         |
| Two-year lag of Has exactly 1 ADL                   | 0.034  |         | 0.014  |         |
| Two-year lag of Has exactly 2 ADLs                  | 0.055  |         | 0.025  |         |
| Two-year lag of Has 3 or more ADLs                  | 0.079  |         | 0.039  |         |
| Two-year lag of Current smoking                     | 0.009  |         | 0.003  |         |
| Two-year lag of Widowed                             | 0.002  |         | 0.001  |         |
| Heart problem status at age 50 (1/0)-imputed        | 0.002  |         | 0.001  |         |
| Stroke status at age 50 (1/0)-imputed               | 0.003  |         | 0.001  |         |
| Cancer status at age 50 (1/0)-imputed               | 0.003  |         | 0.001  |         |
| High blood pressure status at age 50 (1/0)-imputed  | 0.002  |         | 0.001  |         |
| Diabetes status at age 50 (imputed)                 | 0.010  |         | 0.004  |         |
| Lung disease status at age 50 (1/0)-imputed         | -0.002 |         | -0.001 |         |
| Smoking status at age 50 (imputed)                  | 0.001  |         | 0.000  |         |
| Splined two-year lag of BMI <= log(30)              | -0.073 |         | -0.025 |         |
| Splined two-year lag of BMI > log(30)               | -0.017 |         | -0.006 |         |
| Splined init of BMI age 50 <= log(30)               | 0.049  |         | 0.017  |         |
| Splined init of BMI age 50 > log(30)                | 0.014  |         | 0.005  |         |
| Log of years between current interview and previous | 0.028  |         | 0.010  |         |
| Init. of Ever smoked                                | 0.001  |         | 0.000  |         |

note: .01 - \*\*\*, .05 - \*\*, .1 - \*;

|                                                     | Log(BMI) (logbmi)<br>coefficients |         | Log(BMI) (logbmi)<br>marginal effects |         |
|-----------------------------------------------------|-----------------------------------|---------|---------------------------------------|---------|
|                                                     | coef                              | p-value | coef                                  | p-value |
| Male                                                | 0.001*                            | 0.001   | 0.001                                 |         |
| Non-Hispanic black                                  | -0.002**                          | 0.001   | -0.002                                |         |
| Hispanic                                            | -0.002**                          | 0.001   | -0.002                                |         |
| Less than high school                               | -0.002**                          | 0.001   | -0.002                                |         |
| Some college and above                              | -0.000                            | 0.001   | -0.000                                |         |
| l2adl1p                                             | 0.001                             | 0.001   | 0.001                                 |         |
| l2iadl1p                                            | -0.004***                         | 0.001   | -0.004                                |         |
| Male AND Less than high school                      | 0.000                             | 0.001   | 0.000                                 |         |
| Male AND Non-Hispanic black                         | -0.005***                         | 0.001   | -0.005                                |         |
| Male AND Hispanic                                   | -0.001                            | 0.002   | -0.001                                |         |
| Male AND Some college and above                     | -0.001                            | 0.001   | -0.001                                |         |
| Min(63, two-year lag of age)                        | -0.000                            | 0.000   | -0.000                                |         |
| Min(Max(0, two-year lag age - 63), 73 - 63)         | -0.001***                         | 0.000   | -0.001                                |         |
| Max(0, two-year lag age - 73)                       | -0.002***                         | 0.000   | -0.002                                |         |
| Two-year lag of Heart disease                       | -0.001                            | 0.001   | -0.001                                |         |
| Two-year lag of Stroke                              | -0.003***                         | 0.001   | -0.003                                |         |
| Two-year lag of Cancer                              | -0.001                            | 0.001   | -0.001                                |         |
| Two-year lag of Hypertension                        | 0.004***                          | 0.000   | 0.004                                 |         |
| Two-year lag of Diabetes                            | -0.001                            | 0.001   | -0.001                                |         |
| Two-year lag of Lung disease                        | -0.005***                         | 0.001   | -0.005                                |         |
| Two-year lag of R had heart attack since last wave  | 0.006***                          | 0.002   | 0.006                                 |         |
| Two-year lag of Has 2 or more IADLs                 | -0.003**                          | 0.002   | -0.003                                |         |
| Two-year lag of Has exactly 2 ADLs                  | 0.000                             | 0.001   | 0.000                                 |         |
| Two-year lag of Has 3 or more ADLs                  | -0.001                            | 0.001   | -0.001                                |         |
| Two-year lag of Current smoking                     | -0.011***                         | 0.001   | -0.011                                |         |
| Two-year lag of Widowed                             | 0.001*                            | 0.001   | 0.001                                 |         |
| Heart problem status at age 50 (1/0)-imputed        | -0.000                            | 0.002   | -0.000                                |         |
| Stroke status at age 50 (1/0)-imputed               | 0.009*                            | 0.005   | 0.009                                 |         |
| Cancer status at age 50 (1/0)-imputed               | 0.002*                            | 0.001   | 0.002                                 |         |
| High blood pressure status at age 50 (1/0)-imputed  | 0.003***                          | 0.001   | 0.003                                 |         |
| Diabetes status at age 50 (imputed)                 | -0.004***                         | 0.001   | -0.004                                |         |
| Lung disease status at age 50 (1/0)-imputed         | 0.005                             | 0.003   | 0.005                                 |         |
| Init. of Ever smoked                                | 0.002***                          | 0.001   | 0.002                                 |         |
| Smoking status at age 50 (imputed)                  | 0.001                             | 0.001   | 0.001                                 |         |
| Splined two-year lag of BMI <= log(30)              | 0.814***                          | 0.003   | 0.814                                 |         |
| Splined two-year lag of BMI > log(30)               | 0.827***                          | 0.004   | 0.827                                 |         |
| Splined init of BMI age 50 <= log(30)               | 0.138***                          | 0.003   | 0.138                                 |         |
| Splined init of BMI age 50 > log(30)                | 0.102***                          | 0.004   | 0.102                                 |         |
| Log of years between current interview and previous | -0.012***                         | 0.001   | -0.012                                |         |
| Init. of                                            | 0.000                             | 0.000   | 0.000                                 |         |
| _cons                                               | 0.057                             | 0.088   |                                       |         |

note: .01 - \*\*\*; .05 - \*\*; .1 - \*;
